# Supplementary material for: The level of adherence to best-practice guidelines by interprofessional teams with and without acute care nurse practitioners in cardiac surgery: A study protocol
Source: PubMed Central journal article supplement (PMC9976998; doi:10.1371/journal.pone.0282467), 2023-03-01

# PLOS ONE

## The level of adherence to best-practice guidelines by interprofessional teams with and without acute care nurse practitioners in cardiac surgery: a study protocol --Manuscript Draft--

|                                |                                                                                                                                                                                                                                                                                                                                                                                                                                                                                                                                                                                                                                                                                                                                                                                                                                                                                                                                                                                                                                                                                                                                                                                                                                                                                                                                                                                                                                                                                                                                                                                                                                                                                                                                                                                                                                                                                                                                                                                                                                                                                                                                                                                                                                                                                                                            |
|--------------------------------|----------------------------------------------------------------------------------------------------------------------------------------------------------------------------------------------------------------------------------------------------------------------------------------------------------------------------------------------------------------------------------------------------------------------------------------------------------------------------------------------------------------------------------------------------------------------------------------------------------------------------------------------------------------------------------------------------------------------------------------------------------------------------------------------------------------------------------------------------------------------------------------------------------------------------------------------------------------------------------------------------------------------------------------------------------------------------------------------------------------------------------------------------------------------------------------------------------------------------------------------------------------------------------------------------------------------------------------------------------------------------------------------------------------------------------------------------------------------------------------------------------------------------------------------------------------------------------------------------------------------------------------------------------------------------------------------------------------------------------------------------------------------------------------------------------------------------------------------------------------------------------------------------------------------------------------------------------------------------------------------------------------------------------------------------------------------------------------------------------------------------------------------------------------------------------------------------------------------------------------------------------------------------------------------------------------------------|
| <b>Manuscript Number:</b>      | PONE-D-21-40085                                                                                                                                                                                                                                                                                                                                                                                                                                                                                                                                                                                                                                                                                                                                                                                                                                                                                                                                                                                                                                                                                                                                                                                                                                                                                                                                                                                                                                                                                                                                                                                                                                                                                                                                                                                                                                                                                                                                                                                                                                                                                                                                                                                                                                                                                                            |
| <b>Article Type:</b>           | Study Protocol                                                                                                                                                                                                                                                                                                                                                                                                                                                                                                                                                                                                                                                                                                                                                                                                                                                                                                                                                                                                                                                                                                                                                                                                                                                                                                                                                                                                                                                                                                                                                                                                                                                                                                                                                                                                                                                                                                                                                                                                                                                                                                                                                                                                                                                                                                             |
| <b>Full Title:</b>             | The level of adherence to best-practice guidelines by interprofessional teams with and without acute care nurse practitioners in cardiac surgery: a study protocol                                                                                                                                                                                                                                                                                                                                                                                                                                                                                                                                                                                                                                                                                                                                                                                                                                                                                                                                                                                                                                                                                                                                                                                                                                                                                                                                                                                                                                                                                                                                                                                                                                                                                                                                                                                                                                                                                                                                                                                                                                                                                                                                                         |
| <b>Short Title:</b>            | Adherence to best-practice guidelines by interprofessional teams with and without nurse practitioners                                                                                                                                                                                                                                                                                                                                                                                                                                                                                                                                                                                                                                                                                                                                                                                                                                                                                                                                                                                                                                                                                                                                                                                                                                                                                                                                                                                                                                                                                                                                                                                                                                                                                                                                                                                                                                                                                                                                                                                                                                                                                                                                                                                                                      |
| <b>Corresponding Author:</b>   | Li-Anne Audet, MSc<br>McGill University Faculty of Medicine and Health Sciences<br>Montreal, Quebec CANADA                                                                                                                                                                                                                                                                                                                                                                                                                                                                                                                                                                                                                                                                                                                                                                                                                                                                                                                                                                                                                                                                                                                                                                                                                                                                                                                                                                                                                                                                                                                                                                                                                                                                                                                                                                                                                                                                                                                                                                                                                                                                                                                                                                                                                 |
| <b>Keywords:</b>               | Acute care nurse practitioner, best-practice guidelines, cardiac surgery, interprofessional teams, quality of care                                                                                                                                                                                                                                                                                                                                                                                                                                                                                                                                                                                                                                                                                                                                                                                                                                                                                                                                                                                                                                                                                                                                                                                                                                                                                                                                                                                                                                                                                                                                                                                                                                                                                                                                                                                                                                                                                                                                                                                                                                                                                                                                                                                                         |
| <b>Abstract:</b>               | <p><b>Background</b><br/>Acute care nurse practitioners (ACNP) have been implemented in postoperative cardiac surgery settings and have shown to provide significant benefits to patients and organizations. To explain these associations, recent studies have suggested that ACNP increase the level of adherence to best-practice guidelines by interprofessional teams. However, it is unknown if interprofessional teams with ACNP are associated with higher levels of adherence to best-practice guidelines compared to interprofessional teams without ACNP. Furthermore, no extraction tool is available to measure the level of adherence to best-practice guidelines by interprofessional teams in postoperative cardiac surgery settings. This project aims to examine the level of adherence to best-practice guidelines of interprofessional teams with and without ACNP in a postoperative cardiac surgery setting in Québec, Canada.</p> <p><b>Methods</b><br/>A retrospective observational study will be conducted of 300 patients hospitalized between January 1, 2019 and January 31, 2020 in a postoperative cardiac surgery unit in Québec, Canada. Data will be collected from patient health records and electronic databases. An extraction tool will be developed based on systematic review of the literature, and will include best-practice guidelines and confounding variables related to patient and interprofessional teams' characteristics. Content and criterion validation, and a pilot-test will be conducted for the development of the tool. A multivariate linear regression model will be developed and adjusted for several confounding variables, in order to examine the association between interprofessional teams with and without ACNP, and the level of adherence to best-practice guidelines.</p> <p><b>Discussion</b><br/>This project represents the first study to examine the level of adherence to best-practice guidelines by interprofessional teams with and without ACNP in a postoperative cardiac surgery setting. The findings of this project will generate empirical data focusing on the contribution of ACNP within interprofessional teams, and ultimately enhance the delivery of high quality and evidence-based care for patients and families.</p> |
| <b>Order of Authors:</b>       | Li-Anne Audet, MSc<br>Mélanie Lavoie-Tremblay, PhD<br>Éric Tchouaket, PhD<br>Kelley Kilpatrick, PhD                                                                                                                                                                                                                                                                                                                                                                                                                                                                                                                                                                                                                                                                                                                                                                                                                                                                                                                                                                                                                                                                                                                                                                                                                                                                                                                                                                                                                                                                                                                                                                                                                                                                                                                                                                                                                                                                                                                                                                                                                                                                                                                                                                                                                        |
| <b>Additional Information:</b> |                                                                                                                                                                                                                                                                                                                                                                                                                                                                                                                                                                                                                                                                                                                                                                                                                                                                                                                                                                                                                                                                                                                                                                                                                                                                                                                                                                                                                                                                                                                                                                                                                                                                                                                                                                                                                                                                                                                                                                                                                                                                                                                                                                                                                                                                                                                            |
| <b>Question</b>                | <b>Response</b>                                                                                                                                                                                                                                                                                                                                                                                                                                                                                                                                                                                                                                                                                                                                                                                                                                                                                                                                                                                                                                                                                                                                                                                                                                                                                                                                                                                                                                                                                                                                                                                                                                                                                                                                                                                                                                                                                                                                                                                                                                                                                                                                                                                                                                                                                                            |
| <b>Financial Disclosure</b>    | This project is funded by the Réseau de recherche en intervention en sciences infirmières du Québec (RRISIQ). LAA holds doctoral scholarships from the Fonds de                                                                                                                                                                                                                                                                                                                                                                                                                                                                                                                                                                                                                                                                                                                                                                                                                                                                                                                                                                                                                                                                                                                                                                                                                                                                                                                                                                                                                                                                                                                                                                                                                                                                                                                                                                                                                                                                                                                                                                                                                                                                                                                                                            |

Enter a financial disclosure statement that describes the sources of funding for the work included in this submission. Review the [submission guidelines](#) for detailed requirements. View published research articles from [PLOS ONE](#) for specific examples.

This statement is required for submission and **will appear in the published article** if the submission is accepted. Please make sure it is accurate.

#### Unfunded studies

Enter: *The author(s) received no specific funding for this work.*

#### Funded studies

Enter a statement with the following details:

- Initials of the authors who received each award
- Grant numbers awarded to each author
- The full name of each funder
- URL of each funder website
- Have or will the sponsors or funders play any role in the study design, data collection (when applicable) and analysis, decision to publish, or preparation of the manuscript?
- **NO** - Include this sentence at the end of your statement: *The funders had and will not have a role in study design, data collection and analysis, decision to publish, or preparation of the manuscript.*
- **YES** - Specify the role(s) played.

\* typeset

#### Competing Interests

Use the instructions below to enter a competing interest statement for this submission. On behalf of all authors, disclose any [competing interests](#) that could be perceived to bias this work—acknowledging all financial support and any other relevant financial or non-financial competing interests.

This statement is **required** for submission and **will appear in the published article** if the submission is accepted. Please make

recherche du Québec – santé as well as from the Québec Ministry of Education (Ministère de l'Éducation et de l'Enseignement Supérieur du Québec). ET holds a career award from the Fonds de recherche du Québec – Santé (Junior 2 Research Salary Award). KK holds a career award from the Fonds de recherche du Québec – Santé (Senior Research Salary Award) and holder of the Susan E. French Chair in Nursing Research and Innovative Practice. No funding sources were involved in the study conception and design, data collection, analysis, interpretation, or in the final decision to submit this manuscript for publication.

The authors have declared that non competing interests exist.

|                                                                                                                                                                                                                                                                                                                                                                                                                                                                                                                                                                                                                                                                                                                       |                                                                                                                                                                                                                                                                                                                                                                                                                                                                                                                                                                                                                                                                                                                                                                                                                                                                                                                                                                                                                                                                                                                                                                                                                                                                                                                                                                                                                                                            |
|-----------------------------------------------------------------------------------------------------------------------------------------------------------------------------------------------------------------------------------------------------------------------------------------------------------------------------------------------------------------------------------------------------------------------------------------------------------------------------------------------------------------------------------------------------------------------------------------------------------------------------------------------------------------------------------------------------------------------|------------------------------------------------------------------------------------------------------------------------------------------------------------------------------------------------------------------------------------------------------------------------------------------------------------------------------------------------------------------------------------------------------------------------------------------------------------------------------------------------------------------------------------------------------------------------------------------------------------------------------------------------------------------------------------------------------------------------------------------------------------------------------------------------------------------------------------------------------------------------------------------------------------------------------------------------------------------------------------------------------------------------------------------------------------------------------------------------------------------------------------------------------------------------------------------------------------------------------------------------------------------------------------------------------------------------------------------------------------------------------------------------------------------------------------------------------------|
| <p>sure it is accurate and that any funding sources listed in your Funding Information later in the submission form are also declared in your Financial Disclosure statement.</p> <p>View published research articles from <a href="#">PLOS ONE</a> for specific examples.</p> <p><b>NO authors have competing interests</b></p> <p>Enter: <i>The authors have declared that no competing interests exist.</i></p> <p><b>Authors with competing interests</b></p> <p>Enter competing interest details beginning with this statement:</p> <p><i>I have read the journal's policy and the authors of this manuscript have the following competing interests: [insert competing interests here]</i></p> <p>* typeset</p> |                                                                                                                                                                                                                                                                                                                                                                                                                                                                                                                                                                                                                                                                                                                                                                                                                                                                                                                                                                                                                                                                                                                                                                                                                                                                                                                                                                                                                                                            |
| <p><b>Ethics Statement</b></p> <p>Enter an ethics statement for this submission. This statement is required if the study involved:</p> <ul style="list-style-type: none"> <li>• Human participants</li> <li>• Human specimens or tissue</li> <li>• Vertebrate animals or cephalopods</li> <li>• Vertebrate embryos or tissues</li> <li>• Field research</li> </ul> <p>Write "N/A" if the submission does not require an ethics statement.</p> <p>General guidance is provided below. Consult the <a href="#">submission guidelines</a> for detailed instructions. <b>Make sure that all information entered here is included in the Methods section of the manuscript.</b></p>                                        | <p>Ethics approval:<br/>Final REB Approval of a New Research Project<br/>The level of adherence to best-practice guidelines of interprofessionnel teams with and without adult care nurse practitioner in postoperative cardiac surgery: a retrospective observational study (IPSSA chirurgiecardiaque / 2022-8094)<br/>MUHC REB Co-Chair for the CTGQ panel: Me Marie Hirtle</p> <p>Dear Dr. Lavoie-Tremblay,<br/>Thank you for submitting your responses and corrections for the research project indicated above, as requested by the McGill University Health Centre (MUHC) Research Ethics Board (REB).<br/>The MUHC REB, more precisely its Cells, Tissues, Genetics &amp; Qualitative (CTGQ) research panel provided conditional approval for the research project after a delegated review provided by its member(s).<br/>On 2021-09-15, a delegated review of your responses and corrections was provided by member(s) of the MUHC REB. The research project was found to meet scientific and ethical standards for conduct at the MUHC.</p> <p>The following documents were approved or acknowledged by the MUHC REB:<br/>Initial Submission Form (F11NIR-80464)<br/>REB Conditions &amp; PI Responses Form(s) (F20-82210, F20-83659) Documents utilisés pour le recrutement<br/>(Poster_Fr_V2_2021-08-23_REB Approved.docx) [date : 2021-08-23]<br/>(Poster_Eng_V2_2021-08-23_REB Approved.docx) [date : 2021-08-23] Protocole de recherche</p> |

|                                                                                                                                                                                                                                                                                                                                                                                                                                                                                                                                                                                                                                                                                                                                                                                                                                                                                                                                                                                                                                                                                                                                                                                                                                                                                                                                                                                                                                                                                                                                                                                                                           |                                                                                                                                                                                                                                                                                                                                                                                                                                                                                                                                                                                                                                                                                                                                                                                                                                                                                                                                                                                                                                                                                                                                                                                                                                                                                                                                                                                                                                                                                                                                                                                                                                                                                                                                                                                                                                                                                                                                                                                                                                                                                                                                                                                                                                                                                                                        |
|---------------------------------------------------------------------------------------------------------------------------------------------------------------------------------------------------------------------------------------------------------------------------------------------------------------------------------------------------------------------------------------------------------------------------------------------------------------------------------------------------------------------------------------------------------------------------------------------------------------------------------------------------------------------------------------------------------------------------------------------------------------------------------------------------------------------------------------------------------------------------------------------------------------------------------------------------------------------------------------------------------------------------------------------------------------------------------------------------------------------------------------------------------------------------------------------------------------------------------------------------------------------------------------------------------------------------------------------------------------------------------------------------------------------------------------------------------------------------------------------------------------------------------------------------------------------------------------------------------------------------|------------------------------------------------------------------------------------------------------------------------------------------------------------------------------------------------------------------------------------------------------------------------------------------------------------------------------------------------------------------------------------------------------------------------------------------------------------------------------------------------------------------------------------------------------------------------------------------------------------------------------------------------------------------------------------------------------------------------------------------------------------------------------------------------------------------------------------------------------------------------------------------------------------------------------------------------------------------------------------------------------------------------------------------------------------------------------------------------------------------------------------------------------------------------------------------------------------------------------------------------------------------------------------------------------------------------------------------------------------------------------------------------------------------------------------------------------------------------------------------------------------------------------------------------------------------------------------------------------------------------------------------------------------------------------------------------------------------------------------------------------------------------------------------------------------------------------------------------------------------------------------------------------------------------------------------------------------------------------------------------------------------------------------------------------------------------------------------------------------------------------------------------------------------------------------------------------------------------------------------------------------------------------------------------------------------------|
| <p><b>Format for specific study types</b></p> <p><b>Human Subject Research (involving human participants and/or tissue)</b></p> <ul style="list-style-type: none"> <li>• Give the name of the institutional review board or ethics committee that approved the study</li> <li>• Include the approval number and/or a statement indicating approval of this research</li> <li>• Indicate the form of consent obtained (written/oral) or the reason that consent was not obtained (e.g. the data were analyzed anonymously)</li> </ul> <p><b>Animal Research (involving vertebrate animals, embryos or tissues)</b></p> <ul style="list-style-type: none"> <li>• Provide the name of the Institutional Animal Care and Use Committee (IACUC) or other relevant ethics board that reviewed the study protocol, and indicate whether they approved this research or granted a formal waiver of ethical approval</li> <li>• Include an approval number if one was obtained</li> <li>• If the study involved <i>non-human primates</i>, add <i>additional details</i> about animal welfare and steps taken to ameliorate suffering</li> <li>• If anesthesia, euthanasia, or any kind of animal sacrifice is part of the study, include briefly which substances and/or methods were applied</li> </ul> <p><b>Field Research</b></p> <p>Include the following details if this study involves the collection of plant, animal, or other materials from a natural setting:</p> <ul style="list-style-type: none"> <li>• Field permit number</li> <li>• Name of the institution or relevant body that granted permission</li> </ul> | <p>(Research_proposal_Li-AnneAudet_V2_2021-08-23_Fr_REB Approved.docx) [date : 2021-08-23]</p> <p>Documents utilisés pour le recrutement<br/>(Recruitment_email_Fr_V2_2021-08-23_REB Approved.docx) [date : 2021-08-23]<br/>(Recruitment_email_Eng_V2_2021-08-23_REB Approved.docx) [date : 2021-08- 23]</p> <p>Questionnaire(s) et matériel de recherche<br/>(Qualtrics_questionnaire_Fr_REB Approved.docx) [date : 2021-09-06]<br/>(Qualtrics_questionnaire_Eng_REB Approved.docx) [date : 2021-09-06]<br/>(Extraction_tool_Fr_REB Approved.docx)<br/>(Extraction_tool_Eng_REB Approved.docx)</p> <p>FIC approuvé(s) par le CÉR<br/>(ICF_Fr_V2_2021-08-23_REB Approved.docx) [Date: 2021-08-23]<br/>(ICF_Eng_V2_2021-08-23_REB Approved.docx) [Date: 2021-08-23]</p> <p>This will be reported to the MUHC REB and will be entered accordingly into the minutes of the next CTGQ meeting. Please be advised that you may only initiate the study after all required reviews and decisions are received and documented and you have received the MUHC authorization letter.</p> <p>Scientific approval:<br/>Dear Li-Anne,<br/>On behalf the IsoN Comprehensive Examination Committee, I am pleased to confirm that you successfully passed your PhD comprehensive examination on April 13, 2021 for your project entitled: Le niveau d'adhérence aux pratiques exemplaires des équipes interprofessionnelles avec et sans infirmières praticiennes spécialisées en soins aux adultes en contexte de chirurgie cardiaque : une étude observationnelle rétrospective. Your comprehensive examination (both your written protocol and oral presentation of your proposed thesis research) demonstrated that you have sufficient strength in terms of scientific knowledge, originality of thought and the capacity for clear expression to continue your doctoral research.<br/>The Comprehensive Examination Committee members (external examiners) were: Dr. Christine Maheu (Associate Professor, ISON, Chair of the Comprehensive Examination Committee) and Dr. Andraea Van Hulst (Associate Professor, ISON).<br/>You have now advanced to the status of doctoral candidate. Congratulations on this important milestone, and we wish you success with the completion of your doctoral research.<br/>Sincerely,</p> |
| <p><b>Data Availability</b></p> <p>Authors are required to make the data underlying their research findings fully available, without restriction.</p> <p>If the manuscript reports pilot or preliminary results, the data underlying those results must be made available at the time of publication. A Data Availability</p>                                                                                                                                                                                                                                                                                                                                                                                                                                                                                                                                                                                                                                                                                                                                                                                                                                                                                                                                                                                                                                                                                                                                                                                                                                                                                             | <p>N/A - the protocol does not report results</p>                                                                                                                                                                                                                                                                                                                                                                                                                                                                                                                                                                                                                                                                                                                                                                                                                                                                                                                                                                                                                                                                                                                                                                                                                                                                                                                                                                                                                                                                                                                                                                                                                                                                                                                                                                                                                                                                                                                                                                                                                                                                                                                                                                                                                                                                      |

Statement describing where the data can be found is required at submission. Your answers to this question constitute the Data Availability Statement and will be published in the article, if accepted. When legal or ethical requirements prohibit public data sharing, authors must indicate how researchers may obtain access to the data. See the [PLOS Data Policy](#) and [FAQ](#) for detailed information.

**Important:** Stating 'data available on request from the author' is not sufficient. If your data are only available upon request, select 'No' for the first question and explain your situation in the text box.

For protocols without pilot or preliminary data, authors are strongly encouraged to state how they plan to share research data from their study when it is completed or published.

Do the authors confirm that EITHER the protocol does not report results OR all data underlying the preliminary results will be made fully available without restriction?

**Describe where the data may be found in full sentences. If you are copying our sample text, replace any instances of XXX with the appropriate details.**

- If **no pilot data are reported** in the manuscript, please enter the following:  
*No datasets were generated or analysed during the current study. All relevant data from this study will be made available upon study completion.*
- If the manuscript reports pilot data **held in a public repository**, include URLs, accession numbers or DOIs. If this information will only be available after acceptance, indicate this by ticking the box below. For example: *All XXX files are available from the XXX database*

No datasets were generated or analysed during the current study. All relevant data from this study will be made available upon study completion.

(accession number(s) **XXX, XXX**).

- If the manuscript reports pilot data contained **within the manuscript and/or Supporting Information files**, enter the following:

*All relevant data are within the manuscript and its Supporting Information files.*

- If neither of these applies but you are able to provide **details of access elsewhere**, with or without limitations, please do so. For example:

*Data cannot be shared publicly because of [XXX]. Data are available from the **XXX** Institutional Data Access / Ethics Committee (contact via **XXX**) for researchers who meet the criteria for access to confidential data.*

*The data underlying the results presented in the study are available from (include the name of the third party and contact information or URL).*

- This text is appropriate if the data are owned by a third party and authors do not have permission to share the data.

For study protocols with data management or sharing plans, authors are encouraged to briefly describe in their Data Availability Statement how data they generate will be made accessible when the study is completed. For example:

- Deidentified research data will be made publicly available when the study is completed and published.

\* typeset

Additional data availability information:

1       **The level of adherence to best-practice guidelines by interprofessional teams**  
2       **with and without acute care nurse practitioners in cardiac surgery: a study**  
3       **protocol**

4  
5  
6       **Authors and affiliations:** Li-Anne Audet, RN.<sup>1</sup>, M.Sc, Mélanie Lavoie-Tremblay, RN.<sup>2</sup>,  
7       Ph.D, Éric Tchouaket, Ph.D<sup>3</sup>, Kelley Kilpatrick, RN., Ph.D<sup>1,4,5</sup>

8  
9  
10      <sup>1</sup> McGill University, Ingram School of Nursing, Faculty of Medicine and Health Sciences,  
11      680 Sherbrooke West, Suite 1800, Montreal, QC, Canada, H3A2M7

12  
13      <sup>2</sup> Université de Montréal, Faculté des sciences infirmières, Pavillon Marguerite-  
14      d'Youville, 2375 chemin de la Côte-Ste-Catherine, Montreal, QC, Canada, H3T1A8

15  
16      <sup>3</sup> Université du Québec en Outaouais, Département des sciences infirmières, 5 rue  
17      Saint-Joseph, Saint-Jérôme, QC, Canada, J7Z0B7

18  
19      <sup>4</sup> Centre intégré universitaire de santé et de services sociaux de l'Est-de-l'Île-de-  
20      Montréal-Hôpital Maisonneuve-Rosemont (CIUSSS-EMTL-HMR), 5415, boulevard de  
21      l'Assomption, Montreal, QC, Canada, H1T 2M4

22  
23      <sup>5</sup> Susan E. French Chair in Nursing Research and Innovative Practice, McGill University,  
24      Ingram School of Nursing, Faculty of Medicine and Health Sciences, 680 Sherbrooke  
25      West, Suite 1800, Montreal, QC, Canada, H4A 2M7

26  
27      **Corresponding author:** Li-Anne Audet, Ingram School of Nursing, McGill University,  
28      680 Sherbrooke Street West, Montreal, QC, H3A2M7, Email address: [li-  
29      anne.audet@mail.mcgill.ca](mailto:li-anne.audet@mail.mcgill.ca)

30      Word count: 5,520

31

32

33

34

35

36

37

38

39 **The level of adherence to best-practice guidelines by interprofessional teams**  
40 **with and without acute care nurse practitioners in cardiac surgery: a study**  
41 **protocol**

42 **Short title**

43 Adherence to best-practice guidelines by interprofessional teams with and without acute  
44 care nurse practitioners

45 **Abstract**

46 **Background**

47 Acute care nurse practitioners (ACNP) have been implemented in postoperative cardiac  
48 surgery settings and have shown to provide significant benefits to patients and  
49 organizations. To explain these associations, recent studies have suggested that ACNP  
50 increase the level of adherence to best-practice guidelines by interprofessional teams.  
51 However, it is unknown if interprofessional teams with ACNP are associated with higher  
52 levels of adherence to best-practice guidelines compared to interprofessional teams  
53 without ACNP. Furthermore, no extraction tool is available to measure the level of  
54 adherence to best-practice guidelines by interprofessional teams in postoperative  
55 cardiac surgery settings. This project aims to examine the level of adherence to best-  
56 practice guidelines of interprofessional teams with and without ACNP in a postoperative  
57 cardiac surgery setting in Québec, Canada.

58 **Methods**

59 A retrospective observational study will be conducted of 300 patients hospitalized  
60 between January 1, 2019 and January 31, 2020 in a postoperative cardiac surgery unit  
61 in Québec, Canada. Data will be collected from patient health records and electronic



62 databases. An extraction tool will be developed based on systematic review of the  
63 literature, and will include best-practice guidelines and confounding variables related to  
64 patient and interprofessional teams' characteristics. Content and criterion validation,  
65 and a pilot-test will be conducted for the development of the tool. A multivariate linear  
66 regression model will be developed and adjusted for ~~several~~ confounding variables, in  
67 order to examine the association between interprofessional teams with and without  
68 ACNP, and the level of adherence to best-practice guidelines.

## 69 **Discussion**

70 This project represents the first study to examine the level of adherence to best-practice  
71 guidelines by interprofessional teams with and without ACNP in a postoperative cardiac  
72 surgery setting. The findings of this project will generate empirical data focusing on the  
73 contribution of ACNP within interprofessional teams, and ultimately enhance the  
74 delivery of high quality and evidence-based care for patients and families.

## 75 **Keywords**

76 Acute care nurse practitioner, best-practice guidelines, cardiac surgery,  
77 interprofessional teams, quality of care

78

79

80

81

82

83

84

## 85 **Background**

86 Cardiac surgeries are one of the leading types of surgical procedures performed  
87 internationally. In 2017, approximately 1 million patients throughout the world underwent  
88 a cardiac surgery (1). In 2018, the Society of Thoracic Surgeons (STS) reported  
89 287,872 cardiac surgeries and procedures performed in the United States (2). In  
90 Canada, 42,989 coronary artery bypass grafts (CABG) and 7,186 valve repairs were  
91 performed between 2013 and 2016 (3, 4).

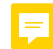

92 In the postoperative phase after the surgery, many patients are at high risk of  
93 developing adverse events and postoperative complications such as myocardial  
94 infarction and wound infection (5). These complications are associated with higher risk  
95 of mortality and development of comorbidities (e.g., heart failure), as well as a decrease  
96 in the well-being and quality of life of patients and families (6). For healthcare  
97 organizations, adverse events and postoperative complications are associated with a  
98 longer length of stay at the hospital, higher rates of readmission in intensive care units,  
99 higher rates of surgical re exploration, and an increase in cost (7, 8).

100 To prevent the risk of adverse events and postoperative complications for  
101 patients and families, international healthcare organizations and research teams have  
102 developed best-practice guidelines (7, 9). Best-practice guidelines are defined as  
103 evidence-based practice of care, and aim to ensure the performance of  
104 interprofessional teams, enhancing the quality and safety of the care given to patients  
105 and families. In postoperative cardiac surgery settings, best-practice guidelines related  
106 to the pharmacotherapy, laboratory tests, clinical indicators, and lifestyle promotion

107 (e.g., diet, cardiac rehabilitation) have been developed and implemented in healthcare  
108 centres (2).

109 A consensus in the literature supports the importance of a high level of  
110 adherence by interprofessional teams to best-practice guidelines, in order to ensure  
111 their efficacy (7, 10). Adherence to best-practice guidelines is defined as the  
112 achievement of ~~the guideline recommendation~~, as well as the associated interventions  
113 ~~recommendations~~, performed by clinicians (11). In surgical settings (e.g., neurosurgery, orthopedic  
114 surgery) international research teams (12-15) have developed composite scores to  
115 examine the level of adherence to best-practice guidelines by interprofessional teams.  
116 Their findings suggested that a higher level of adherence is associated with a higher  
117 quality of care given to patients and families.

118 In postoperative cardiac surgery settings, recent studies (5, 16) identified a  
119 significant association between a high level of adherence to best-practice guidelines by  
120 interprofessional teams and a lower risk of postoperative complications and adverse  
121 events for patients. Other studies (5, 16, 17) have shown a significant association  
122 between a lower level of adherence to best-practice guidelines by interprofessional  
123 teams and a higher risk of postoperative complications and adverse events for patients.  
124 Larrazet et al. (2014) conducted a longitudinal study  from 144 patients who died after  
125 cardiac surgery. The authors identified a significant association between a lack of  
126 adherence to best-practice guidelines by interprofessional teams, and a higher risk of  
127 mortality, highlighting the importance of ~~the~~  high adherence to best-practice guidelines  
128 by interprofessional teams (17). 

129           Recent studies have examined the practice of nurse practitioners (NP) within  
130 primary and acute care settings, and suggested that their practice could increase the  
131 level of adherence to best-practice guidelines by interprofessional teams (18, 19). The  
132 NPs support of the practice of different care providers in the team with a focus on best  
133 evidence is believed to **undergird** providers' adherence to best-practice guidelines   
134 focused on pharmacotherapy, clinical indicators, and lifestyle promotion. NPs also  
135 enhance collaboration and communication among teams' members and ~~the~~ continuity of   
136 care, ~~contributing to the higher~~ adherence to best-practice guidelines by   
137 interprofessional teams (18, 20).

138           The NP is an advanced practice nursing role, based on a **graduate-level**   
139 education and in-depth nursing and medical expertise (21-23). In several acute care  
140 settings, including postoperative cardiac surgery, acute care nurse practitioners (ACNP)  
141 have been implemented in interprofessional teams and performed activities such as the  
142 clinical and psychosocial assessment of patients, the prescription and management of  
143 pharmacotherapy, laboratory tests and clinical interventions, lifestyle promotion,  
144 teaching of coping strategies, preparation for hospital discharge, and the management  
145 of consultations and external resources (24). International research teams (23, 25) have  
146 examined **their** practice in postoperative cardiac surgery settings. They identified   
147 significant associations between the ACNPs' practice and higher patient satisfaction, as  
148 well as between higher participation of patients to cardiac rehabilitation and lower length  
149 of stay at the hospital after the cardiac surgery. **However, other research teams** (21,   
150 26) did not identify significant associations between ACNP practice and patient and  
151 organizational outcomes within postoperative cardiac surgery settings, thus leading to

152 inconsistent findings in the current literature. To understand the inconsistent findings in  
153 the current literature, systematic reviews of randomized controlled trials (RCT) (21, 23)  
154 have been conducted. These systematic reviews have identified three important limits  
155 contributing to the inconsistent findings of the current literature.

156         Firstly, although several RCT of the current literature focus on the efficacy of  
157 ACNP for patients and healthcare organizations, less attention has been paid to the  
158 efficacy of these providers for interprofessional teams. The qualitative study of Reich et  
159 al. (2018) suggested that the implementation of ACNP within interprofessional teams  
160 increases the level of adherence of those teams to best-practice guidelines in  
161 postoperative cardiac surgery settings, and represents an underlying factor contributing  
162 to the efficacy of NP (19). However, these propositions have not been subjected to  
163 statistical validation, thus it is unknown if interprofessional teams with ACNP are  
164 associated with higher levels of adherence to best-practice guidelines, compared to  
165 interprofessional teams without ACNP. Moreover, until today, no validated extraction  
166 tool is available to measure the level of adherence to best-practice guidelines of  
167 interprofessional teams with and without ACNP in postoperative cardiac surgery  
168 settings.

169         Secondly, systematics reviews have highlighted the difficulty in adequality  
170 controlling confounding variables in the existing RCT (21, 23). Confounding variables  
171 represent important factors influencing the efficacy of ACNP on patient and  
172 organizational outcomes in postoperative cardiac surgery settings. Methodological limits  
173 of the existing RCT, such as the small sample size and high attrition rate, limit the  
174 capacity of research teams to develop robust multivariate statistical models adjusted for

175 confounding variables related to patient, interprofessional teams, and organizational  
176 characteristics (21, 23). Interestingly, retrospective observational studies have shown to  
177 be a relevant alternative to examine the association between ACNP and patient and  
178 organizational outcomes in postoperative cardiac surgery settings. Existing studies (27-  
179 30) have used retrospective observational studies to gather a large cohort of patients,  
180 limit attrition, and develop statistical models adjusted for many confounding variables.  
181 These studies (6, 27-29) have identified significant associations between ACNP within  
182 interprofessional teams, and lower risks of mortality and decreased costs in  
183 postoperative cardiac surgery settings.

184 Thirdly, the majority of the RCT focuses on ~~the practice of~~ ACNP within primary   
185 care settings (e.g., in-home care, rehabilitation clinic) after ~~the~~ cardiac surgery. Less  
186 attention has been paid to ~~the practice of~~ ACNP in acute care settings; however, within   
187 these settings, ACNP works in collaboration with cardiac surgeons, nursing teams,  
188 rehabilitation teams, social workers, and other members of ~~the~~ interprofessional teams  
189 to ensure ~~the patient~~ optimal recovery after ~~the~~ surgery, and prevents ~~the~~ risk of  
190 adverse events and postoperative complications. ~~Moreover,~~ for patients and families,  
191 the acute care hospitalization after ~~the~~ surgery represents a crucial phase of their  
192 postoperative recovery and is associated with several physical, psychosocial, and  
193 emotional stressors (30). Future studies are needed to ~~better document~~ the contribution   
194 of ACNP in interprofessional teams within acute care settings, and identify the benefits  
195 of their practice for patients, families, interprofessional teams, and healthcare  
196 organizations.

197  ~~Consequently~~, this project aims to examine the level of adherence to best-  
198 practice guidelines of interprofessional teams with and without ACNP in acute  
199 postoperative cardiac surgery settings in Québec, Canada.

## 200 **Study objectives and hypothesis**

201 The objectives of this study are as follows:

202 1. Develop and pilot-test an extraction tool to measure the level of adherence to  
203 best-practice guidelines of interprofessional teams within postoperative cardiac  
204 surgery setting.

205 2. Describe the patient and interprofessional teams' characteristics, as well as the  
206 level of adherence to best-practice guidelines, of patients under the care of  
207 interprofessional teams with and without ACNP.

208 3. Examine the association between interprofessional teams with ACNP and the  
209 level of adherence to best-practice guidelines, compared to interprofessional  
210 teams without ACNP, **after adjusting patient and interprofessional team**

211 **characteristics in postoperative cardiac surgery setting.** 

212 4. The hypothesis of this study is:

213 H1: This study will verify if interprofessional teams with ACNP are associated  
214 with a higher level of adherence to best-practice guidelines compared to  
215 interprofessional teams without ACNP, after controlling for the patient and  
216 interprofessional team characteristics.

## 217 **Methods and design**

### 218 **Study design**

219 A retrospective observational study (31, 32) will be conducted at a University healthcare  
220 centre (UHC) in Québec, Canada. Annually, this healthcare centre performs  
221 approximately 1,000 cardiac surgeries and procedures and has a postoperative cardiac  
222 surgery unit of 36 beds. De-identified data will be extracted from the UHC data  
223 warehouse and the patient health records to assemble the retrospective cohort of  
224 patients and conduct the data collection. Ethics approval was obtained from the McGill  
225 University Health Centre Research Ethics Board on September 15, 2021 (IPSSA  
226 chirurgie cardiaque/2022-8094). ~~This project uses the guidelines from *Strengthening the*  
227 *Reporting of Observational Studies in Epidemiology (STROBE) Statement: Guidelines*  
228 *for Reporting Observational Studies* (32) were used for this project (SA appendix).~~

### 229 **The hospitalization of patients after cardiac surgery**

230 After cardiac surgery, patients are admitted to the intensive care unit (ICU), and are  
231 under the care of ICU teams. At the time of data collection, the ICU teams in Québec,  
232 Canada do not include ACNP. On average, patients are hospitalized for 24 hours in the  
233 ICU before being transferred to the postoperative cardiac surgery unit. Patients  
234 readmitted to the ICU are under the care of ICU teams.

235 Upon admission to the postoperative cardiac surgery unit, patients are assigned  
236 to the care of interprofessional teams with or without ACNP. Team assignment depends  
237 on the current workload of each team, and the availability of the beds in the unit.  
238 Interprofessional teams with ACNPs are assigned 16 of the unit's beds (44%) and  
239 interprofessional teams without ACNP are assigned 20 of the unit's beds (56%).  
240 Patients are followed by their respective teams from their admission to the cardiac



241 surgery unit, until the hospital discharge or death. On average, the length of stay at the  
242 hospital after the surgery ranges from 9 to 11 days (33).

243 Interprofessional teams with and without ACNP include the following: cardiac  
244 surgeons and residents nursing teams, skin care and wound therapists,  
245 physiotherapists, nutritionists, respiratory therapists, social workers, and medical and  
246 other specialists. Interprofessional teams with and without ACNP ensure the daily  
247 follow-up of patients, the assessment of the patient's clinical and psychosocial condition,  
248 the management of pharmacotherapy, clinical intervention, laboratory tests, lifestyle  
249 promotion, and the preparation of patients upon hospital discharge.

### 250 **The practice of acute care nurse practitioners in postoperative cardiac surgery** 251 **unit**

252 Since 2017, seven ACNPs practice in postoperative cardiac surgery, based on a  
253 monthly rotation system. Two ACNP simultaneously practice within interprofessional  
254 teams and collaborate with other clinicians to ensure the daily follow-up of the patients  
255 after cardiac surgery. ACNP practice includes the assessment of the clinical and  
256 psychosocial condition of the patient and families, the management of the  
257 pharmacotherapy, clinical interventions, and laboratory tests. The ACNP also teaches  
258 coping strategies, lifestyle promotion, cardiac rehabilitation, preparation of the patients  
259 and families for the in-home recovery after discharge, and supports the cardiac surgeon  
260 in the patient hospital discharge (34). 

### 261 **Study population and sample**

262 A dynamic cohort of patients will be assembled from hospitalized patients at the  
263 postoperative cardiac surgery unit between January 1, 2019, and January 31, 2020.

264 This timeframe will avoid the recruitment of patients during the COVID-19 pandemic, a  
265 window of time during which the practice of ACNP within the unit was inconsistent.  
266 Patients will be selected, based on three inclusion criteria: 1) patient admitted for a  
267 diagnosis of CABG and/or valve repair (~~i.e., these surgeries were selected because~~  
268 ~~they are the most frequently performed internationally~~), 2) patient age is over 18 years  
269 old, and 3) patient has been hospitalized for at least 24 hours in the postoperative  
270 cardiac surgery unit. The minimum 24-hour criteria will allow our team to examine the  
271 hospitalization of the patient at the postoperative cardiac surgery unit, which is the   
272 setting where ACNPs practice in Québec (35). Patients will be identified from the  
273 electronic databases of the UHC and the diagnostic codes of the Canadian Institute for  
274 Health Information (36) (SB appendix).

275 A sample size calculation was conducted in G\*power (37). This project will  
276 include 15 variables, including one independent variable, one dependent variable, and   
277 13 confounding variables. To perform one multivariate linear regression model and  
278 detect an effect size of  $f^2=0.15$  with a power of 0.80 and a standard error of 5%, a  
279 minimum sample size of 183 patients was estimated.

280 A total of 300 patients will be selected, based on the sample size calculation and  
281 an over-estimation of at least 20%, to consider the risk of error from the presence of  
282 missing data and incomplete patient health records (38, 39). A systematic random  
283 selection of 150 patients under the care of interprofessional teams with ACNP will be  
284 conducted and matched with 150 patients under the care of interprofessional teams  
285 without ACNP. Three criteria (40-43) will be used to match each pair (1:1): 1) age (i.e., a

286 five-year gap will be tolerated) 2) sex, and 3) type of cardiac surgery (i.e., CABG, valve  
287 repair, or CABG/valve repair).

288 Patients will be followed from their admission to the ICU after the cardiac  
289 surgery, until the occurrence of the following events, whichever occurs first: 1)  
290 discharge from the hospital, 2) death, or 3) the cumulation of 14-days in hospital after  
291 the surgery. The 14-days' timeframe will allow our team to capture the acute phase of  
292 the patient hospitalization after the cardiac surgery (33). The total length of stay for  
293 patients hospitalized longer than 14-days will be measured.

#### 294 **Variables under study**

295 A systematic review of RCTs (24) and an extensive search in the literature and  
296 international healthcare organizations (e.g., American Heart Association, Society of  
297 Thoracic Surgeons) was conducted to retrieve best-practice guidelines for  
298 interprofessional teams in postoperative cardiac surgery settings, and confounding  
299 variables related to patient and interprofessional teams' characteristics. A total of 12  
300 best-practice guidelines and 13 confounding variables were identified and presented in  
301 Figure 1. The operationalization of each variable is presented in SC appendix.

302 *Independent variable: interprofessional teams with and without acute care nurse*  
303 *practitioner*

304 A dichotomous variable will be created to measure the inclusion of at least one ACNP  
305 within the interprofessional team. For patients under the care of an interprofessional  
306 team with ACNP, an additional descriptive variable will measure the number of days  
307 where the ACNP was implicated in the daily follow-up of the patient, on the entire  
308 hospitalization at the postoperative cardiac surgery unit.

309 *Dependant variable: the level of adherence to best-practice guidelines by*  
310 *interprofessional teams*

311 A composite score will be developed to measure the level of adherence to best-practice  
312 guidelines by interprofessional teams. An individual composite score will be calculated  
313 per patient per day of hospitalization at the postoperative cardiac surgery unit. A total of  
314 12 best-practice guidelines will be included in the composite score (Figure 1). Each  
315 best-practice guideline will be scored on two points based on the following: 1) the  
316 achievement of the guideline recommendation (e.g., prescription of beta blocker) and 2)  
317 the associated interventions performed by clinicians (e.g., follow-up of the blood  
318 pressure). All best-practice guidelines are divided into three categories: 1)  
319 pharmacotherapy (n=4), 2) laboratory tests (n=4), and 3) postoperative assessment  
320 (n=4).

321 Four best-practice guidelines are included in the category of pharmacotherapy.  
322 These guidelines are the prescription and monitoring of medications including: 1)  
323 anticoagulants, 2) beta blockers, 3) lipid-lowering agents, and 4) anti-platelets, during  
324 hospitalization and at hospital discharge of the patient. For each best-practice guideline,  
325 two additional descriptive variables will be collected, including the type of medication  
326 prescribed and the presence of a contraindication, which precludes the possibility of  
327 achieving the guideline recommendation (e.g., allergy).

328 Four best-practice guidelines on laboratory tests are included, recommending the  
329 prescription and monitoring of the following: 1) potassium (K+), 2) magnesium (Mg+), 3)  
330 serum glucose, and 4) **international normalized ratio (INR)** by interprofessional teams  
331 during the patient's hospitalization in the postoperative cardiac surgery unit. The 

332 achievement of each best-practice guideline recommendation will be confirmed if the  
333 laboratory result falls under the normal range supported by the current literature. The  
334 following three additional descriptive variables will be measured for each guideline: 1)  
335 number of prescriptions requested by interprofessional teams, 2) proportion of abnormal  
336 values below or above normal range, and 3) average of all values of laboratory tests.

337 Four best-practice guidelines are included in the category of the postoperative  
338 assessment performed by interprofessional teams. A daily assessment of the patient's  
339 level of pain, surgical wound(s), nutrition, and mobilization will be measured. For each  
340 best-practice guideline recommendation, the achievement of the guideline will be  
341 confirmed if at least one postoperative assessment per day is performed by the ACNP  
342 or other members of the interprofessional teams during the patient's hospitalization in  
343 the postoperative cardiac surgery unit. Two additional descriptive variables will be  
344 measured for each best-practice guideline, including: 1) the total number of  
345 postoperative assessments performed by interprofessional teams during the  
346 hospitalization, and 2) the type of associated interventions conducted by clinicians (e.g.,  
347 non-pharmacological, consultation, etc.).

348 *Confounding variables related to patient characteristics*

349 Eleven confounding variables related to patient characteristics will be measured. For  
350 each patient, sociodemographic characteristics (e.g., sex, age) will be measured. The  
351 total length of stay at the hospital will be measured, which includes the stay in the ICU  
352 and postoperative cardiac surgery unit. The type of cardiac surgery will be collected  
353 from a categorical variable with three categories: 1) CABG, 2) valve repair, and 3)  
354 CABG/valve repairs. Comorbidities will be measured and operationalized from the

355 Charlson Comorbidity Index (CCI) (44, 45). A total score of 24 points will be calculated  
356 for each patient based on the 17 clinical conditions included in the CCI (SD appendix).  
357 The length of stay in the postoperative cardiac surgery unit will be collected for each  
358 patient. The hospital 30-days readmission at the postoperative cardiac surgery unit after  
359 discharge will be measured for each patient from a dichotomous variable.

360 Four confounding variables related to the patient characteristics in the ICU  
361 setting will be measured. The total number of hours hospitalized in the ICU will be  
362 measured from the time (in hours) of admission to the ICU after the surgery and the  
363 time (in hours) of discharge of the patient. The postoperative prolonged mechanical  
364 ventilation will be measured from a dichotomous variable. A prolonged mechanical  
365 ventilation will be confirmed if the time under mechanical ventilation exceeds 24 hours.  
366 The failed extubation of the patient and reintubation after first extubation will be  
367 measured with a dichotomous variable. The number of episodes of ICU readmission  
368 after initial discharge will be measured for each patient.

369 *Confounding variables related to interprofessional teams' characteristics*

370 Two confounding variables related to interprofessional teams' characteristics will be  
371 measured. First, the cardiac surgeon who performed the surgery and ensured the  
372 follow-up of the patient's recovery will be noted. A confidential code will be created for  
373 each surgeon practising in the UHC. Second, a discrete variable will be created to  
374 measure the number of consultations conducted by clinicians from different expertises  
375 (e.g., nutrition, rehabilitation team) during the patient's hospitalization in the  
376 postoperative cardiac surgery unit. A categorical descriptive variable will be created to  
377 measure each clinicians expertise, including the following: 1) rehabilitation team (e.g.,

378 physical therapist, occupational therapist), 2) respiratory therapist, 3) social worker, 4)  
379 skin and wound care therapist, 5) nutritionist, and 6) speciality consultation (e.g.,  
380 internal medicine, nephrology).

### 381 **Data collection**

382 An extraction tool will be developed and pilot-tested, based on the best-practice  
383 guidelines and the confounding variables related to the patient and interprofessional  
384 team characteristics (Figure 1). One extraction will be completed per patient per day  
385 during the hospitalization in the postoperative cardiac surgery unit. The development of  
386 the extraction tool followed the Consensus-based Standards for the selection of health  
387 measurement instrument (COSMIN) guidelines (46) and will include three stages: the  
388 content validation; the criteria validation; and the pilot-test.

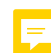

#### 389 *Data collection for the content validation*

390 Content validation will be performed following two steps (46). First, an expert committee  
391 will be recruited from clinicians, managers, and researchers who have expertise in  
392 postoperative cardiac surgery. The identification and recruitment of experts will be  
393 conducted by our research team and will include experts in Canada. A total of 10  
394 experts will be recruited, including at least the following five: 1) an ACNP who worked a  
395 minimum of one year within a postoperative cardiac surgery unit outside of our  
396 associated UHC, 2) a cardiac surgeon or fellow in cardiac surgery who worked at least  
397 two years in an acute care centre outside of our associated UHC, 3) a nurse manager  
398 who manages, at least one year, a postoperative cardiac surgery unit, within our  
399 associated UHC, 4) a healthcare professional who worked in the data warehouse of our

400 associated UHC for at least one year, and 5) a researcher in nursing or healthcare  
401 sciences with an expertise in measurement instruments and/or cardiac surgery.

402         Second, an electronic survey (47) will be created and composed of all items of  
403 the extraction tool (best-practice guidelines and confounding variables). For each item,  
404 experts will assess its relevance using a 5-points Likert scale (48, 49). Additional  
405 spaces for qualitative comments and suggestions will be included in the survey. Two  
406 rounds of revision are planned. After the first round, our team will update the extraction  
407 tool and revise any unclear items based on the experts' recommendations, and an  
408 updated version will be resubmitted to the expert committee.

409 *Data collection for the criterion validation*

410 The criterion validation of the extraction tool will follow three consecutive steps. Firstly,  
411 the best-practice guidelines of The Society of Thoracic Surgeons (STS) have been  
412 selected as the gold standard of comparison for this study. For many years, the STS  
413 has been a leading healthcare organization in the development and validation of best-  
414 practice guidelines and performance measures in the care of patients in cardiac surgery  
415 settings (10). In 2007, the STS developed and validated 21 performance measures for  
416 the delivery of high quality of care for patients who underwent CABG, valve repair, and  
417 CABG/valve repairs (50, 51). For this project, five performance measures were  
418 selected, including: 1) prolonged mechanical ventilation higher than 24 hours in the ICU;  
419 2) a 30-day readmission rate at the postoperative cardiac surgery unit after hospital  
420 discharge; and prescription of the 3) anti-platelet, 4) beta blocker, 5) and lipid-lowering  
421 agent, during the hospitalization at the postoperative cardiac surgery unit and at  
422 discharge. Each performance measure is operationalized as the proportion of patients



423 who achieved the outcome (e.g., proportion of patients who were under prolonged  
424 mechanical ventilation) over the total sample size (46, 47).

425 Secondly, 30 patient health records will be reviewed independently by two  
426 reviewers on two occasions. For the first round of revision, the patient's health record  
427 will be reviewed with the extraction tool. For the second round of revision, the records  
428 will be reviewed with the five performance measures from the STS.

#### 429 *Data collection for the pilot-test*

430 A pilot-test will be conducted to assess the feasibility of the tool, standardize data  
431 collection among reviewers, examine the quality and accessibility of the retrospective  
432 data, and update the tool if needed. Four iterative steps will be included in the pilot-test  
433 (52-55). First, two reviewers will conduct the pilot-test and data collection. Training  
434 sessions and documentation will be given to the reviewers.

435 Secondly, 30 patient health records from hospitalized patients in the  
436 postoperative cardiac surgery unit between January 1, 2019, and January 31, 2020, will  
437 be randomly selected. These patients will not be included in the retrospective cohort.  
438 Data will be collected by the two reviewers with the extraction tool. Inter-rater reliability  
439 will be assessed and a Cohen kappa higher than 0.60 will be targeted (55).

440 Thirdly, a triangulation of the available data will be performed to assess the  
441 quality and accessibility of the data. Multiple data sources will be screened between the  
442 electronic databases and patient health records. Items from the extraction tool with a  
443 high quantity of missing data or low quality of available data will be modified or  
444 removed.

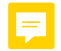

445 Finally, frequent meetings among all research team members will be conducted  
446 to discuss divergences, reinforce convergences, and establish a consensus. The  
447 extraction tool will be updated after the pilot-test if needed (52).

448 During data collection from the retrospective cohort of patients, an additional 30  
449 patient health records will be reviewed by two independent reviewers to ensure the  
450 standardization of the data collection (49, 50). Inter-rater reliability will be assessed and  
451 a Cohen Kappa value higher than 0.60 will be targeted (55).

## 452 **Data analysis**

453 Statistical analysis will be conducted to meet objectives one, two and three. The unit of  
454 observation will be the patient-level and the unit of analysis will be the interprofessional  
455 team-level.

### 456 *Objective 1*

457 The content validation of the extraction tool will include two rounds of revisions, with  
458 additional rounds if needed (56, 57). For each round of revision, a Fleiss Kappa will be  
459 calculated and a value between 0.60 and 0.80 will be targeted (48, 49). The content  
460 validity index (CVI) of each individual item of the extraction tool will be calculated from  
461 the proportion of experts who rated a score of 4 or 5 on the Likert scale (58). A CVI of  
462 0.80 will be targeted for each item and items with a value below 0.80 will be removed or  
463 modified. Then, the proportion of items with a CVI value above 0.80 will be calculated to  
464 determine the overall CVI of the extraction tool. A value higher than 0.80 for the overall  
465 CVI of the extraction tool will be targeted (46). Qualitative comments and  
466 recommendations by experts will be analyzed by content analysis (59).

467 The criteria validation will be assessed using 30 patient health records. Five  
468 performance measures developed by the STS will serve as the gold standard for the  
469 comparison (10). First, the proportion of patients who achieved each performance  
470 measure over the total sample size (n=30) will be calculated, from the measures  
471 collected with the gold standard, as well as the measures collected with the extraction  
472 tool. Second, Spearman correlation will be calculated to assess the correlation between  
473 the proportions obtained from the measures of the gold standard, and the proportions  
474 obtained from the measures of the extraction tool. Values of Spearman correlation  
475 higher than 0.70 will be targeted (48, 49).

#### 476 *Objective 2*

477 Descriptive analysis will be performed to assess the level of adherence by  
478 interprofessional teams with and without ACNP, as well as the confounding variables for  
479 patients under the care of both teams (60). An analysis of missing data will be  
480 conducted to examine the quality and distribution of missing data within patient health  
481 records and electronic databases. Team meetings and consultations with clinicians and  
482 statisticians will be held to discuss and identify potential causes of missing data, as well  
483 as to conduct a statistical analysis to manage them (61).

484 A composite score will be developed to measure the level of adherence to best-  
485 practice guidelines by interprofessional teams with and without ACNP. A composite  
486 score per patient per day of hospitalization in postoperative cardiac surgery will be  
487 developed and based on four consecutive steps. 

488 Firstly, for each best-practice guideline, a score on a scale of two will be created  
489 and points will be attributed for: 1) the achievement of the best-practice guideline

490 recommendation, and 2) the associated intervention performed by clinicians. Points will  
491 be given based on the information contained in the patient health record and electronic  
492 databases. A missed intervention will be considered as a lack of adherence to best-  
493 practice guidelines, and no point will be given.

494 Secondly, all best-practice guidelines are divided into three categories: 1)  
495 pharmacotherapy, 2) laboratory tests, and 3) postoperative assessments. The sum of  
496 the individual score of each best-practice guideline will be calculated for each category.  
497 More specifically, each category includes four best-practice guidelines, and will be  
498 based on a total score ranging from zero to eight.

499 Thirdly, an overall composite score will be calculated from the sum of all the  
500 scores of the three categories, ranging from zero to 24. The overall composite score will  
501 be transformed into a value in percentage (0 to 100%) and an increase of the score will  
502 be associated with an increase of the level of adherence to best-practice guidelines by  
503 interprofessional teams. An overall score will be calculated per patient per each day  
504 hospitalized in the postoperative cardiac surgery unit.

505 Finally, an average composite score will be calculated from the average of all  
506 overall scores during the patient's hospitalization at the postoperative cardiac surgery  
507 unit. An average composite score will be calculated for all patients included in the  
508 retrospective cohort. A graphic illustration will be created from all average scores to  
509 visualize the tendency and distribution of the scores of the cohort.

### 510 *Objective 3*

511 Bivariate analysis will be conducted, and the statistical significance will be based on a  $p$ -  
512 value of 0.05 (60). The Bonferroni correction will be applied for the examination of each

513 confounding variable related to the patient and interprofessional teams' characteristics  
514 (62).

515 A multivariate linear regression model will be developed to examine the  
516 association between interprofessional teams with and without ACNP and the level of  
517 adherence to best-practice guidelines (63-65). An examination of the distribution of the  
518 data will be performed. In the case of an abnormal distribution of the data, a  
519 transformation will be conducted to adjust the statistical model based on the observed  
520 data. The independent variables will include the interprofessional teams with and  
521 without ACNP, as well confounding variables. A correlation matrix will be developed,  
522 and tolerance value lower than 0.2 and a variance inflation factor (VIF) value higher  
523 than 5 will be used to identify multicollinearity between independent variables (63-65).  
524 Independent variables with multicollinearity will be removed one at the time and a new  
525 regression will be calculated. The dependent variable of the regression model will be  
526 the average composite score (%) of the level of adherence to best-practice guidelines.  
527 Statistical significance will be based on a  $p$ -value of 0.05. Sensibility analysis will be  
528 conducted based on a selection of confounding variables related to the characteristics  
529 of the patient (e.g., length of stay, ICU readmission). The selection of these confounding  
530 variables will be based on the observed data and descriptive analysis. The residual  
531 analysis and the analysis of the  $R^2$  will be conducted to assess the goodness-of-fit of  
532 the multivariate linear regression model.

### 533 **Interpretation of the findings**

534 Consultations with clinicians and managers practising in postoperative cardiac surgery  
535 settings in Québec and Canada will be conducted to gain an in-depth understanding of

536 the findings. These consultations will allow our team to explore potential underlying  
537 factors and mechanisms which could influence the level of adherence to best-practice  
538 guidelines by interprofessional teams with and without ACNP. Field notes will be taken  
539 during these consultations and analyzed using content analysis (45). 

#### 540 **Ethical considerations**

541 Ethics approval was obtained prior to the beginning of the study. No identifying  
542 information will be collected during the content validation with the expert committee and  
543 the data collection within electronic databases and patient health records. A confidential  
544 pairing system will be created to match the patient identification with a random number  
545 (66). The database of the project will be kept in a secure server, protected by a  
546 confidential numeric code known only by the research team. During the dissemination of  
547 the findings, data will be shared in an aggregated form and the identity of the UHC, as  
548 well as the identity of the patients and clinicians, will remain confidential.

#### 549 **Discussion**

550 ACNPs hold an important place within interprofessional teams caring for patients and  
551 families following cardiac surgery. For patients and families, ACNPs contribute to the  
552 management of pharmacotherapy, clinical and psychosocial conditions, as well as  
553 lifestyle promotion and teaching of coping strategies. For interprofessional teams,  
554 ACNPs enhance ~~the~~ collaboration and communication among team members and  
555 reinforce continuity of care. Until now studies examined the efficacy of ACNP on patient  
556 and organization outcomes within postoperative cardiac surgery settings; however, less  
557 attention has been paid to underlying factors contributing to the effect of ACNPs on  
558 these outcomes. To the best of our knowledge, this study represents the first project to

559 examine the association between interprofessional teams with and without ACNP, and  
560 the level of adherence to best-practice guidelines in a postoperative cardiac surgery  
561 setting. As part of this project, a systematic review of randomized controlled trials was  
562 published to retrieve the current literature of the efficacy of ACNP and advanced  
563 practice nursing roles in postoperative cardiac surgery settings, and to examine their  
564 adherence to best-practice guidelines (40).

565 ~~Finally,~~ the findings of this study will further the understanding of the contribution  
566 of ACNP for interprofessional teams, clinicians and managers practising in  
567 postoperative cardiac surgery settings in Québec, Canada and **internationally**. This   
568 project will generate empirical data to support and document the practice of ACNPs  
569 within interprofessional teams. ~~Finally,~~ the extraction tool focusing on the level of  
570 adherence to best-practice guidelines by interprofessional teams in postoperative  
571 cardiac surgery will be available for the field of cardiac surgery research, and the  
572 scientific community more broadly. 

### 573 **Funding**

574 This project is funded by the Réseau de recherche en intervention en sciences  
575 infirmières du Québec (RRISIQ). Li-Anne Audet holds doctoral scholarships from the  
576 Fonds de recherche du Québec – santé as well as from the Québec Ministry of  
577 Education (Ministère de l'Éducation et de l'Enseignement Supérieur du Québec).  
578 Éric Tchouaket holds a career award from the Fonds de recherche du Québec – Santé  
579 (Junior 2 Research Salary Award). Kelley Kilpatrick holds a career award from the  
580 Fonds de recherche du Québec – Santé (Senior Research Salary Award) and holder of  
581 the Susan E. French Chair in Nursing Research and Innovative Practice. No funding

582 sources were involved in the study conception and design, data collection, analysis,  
583 interpretation, or in the final decision to submit this manuscript for publication.

#### 584 **Competing interest**

585 None to declare.

#### 586 **Acknowledgments**

587 The authors would like to acknowledge the comments received from Christine Maheu,  
588 Andraea Van Hulst, and Alain Biron.

#### 589 **Author Contributions**

590 Conceptualization: Li-Anne Audet, Mélanie Lavoie-Tremblay, Éric Tchouaket, Kelley  
591 Kilpatrick

592 Methodology: Li-Anne Audet, Mélanie Lavoie-Tremblay, Éric Tchouaket, Kelley  
593 Kilpatrick

594 Supervision: Mélanie Lavoie-Tremblay, Éric Tchouaket, Kelley Kilpatrick

595 Writing – original draft: Li-Anne Audet

596 Writing – review & editing: Mélanie Lavoie-Tremblay, Éric Tchouaket, Kelley Kilpatrick

#### 597 **References**

- 598 1. Caplan LR. Primer on cerebrovascular diseases. London, United Kingdom:  
599 Academic Press is an imprint of Elsevier; 2017.  
600
- 601 2. Bowdish ME, D'Agostino RS, Thourani VH, Desai N, Shahian DM, Fernandez  
602 FG, et al. The Society of Thoracic Surgeons Adult Cardiac Surgery Database: 2020  
603 Update on Outcomes and Research. The Annals of thoracic surgery. 2020;109(6):1646-  
604 55.  
605
- 606 3. Philippon F, Racine N, Labrecque N, Paradis M-J. Réseau québécois de  
607 cardiologie tertiaire. Rapport d'activité 2010-2013. Québec, QC; 2013.  
608
- 609 4. Canadian Institute of Health Information. Cardiac Care Quality Indicators Report.  
610 Ottawa, ON: Canadian Institute for Health Information  
611 ; 2017.



- 612  
613 5. Bourgon Labelle J, Audet L, Farand P, Rochefort C. Are hospital nurse staffing  
614 practices associated with postoperative cardiac events and death? A systematic review.  
615 PLOS ONE [Internet]. 2019; 14(10).  
616
- 617 6. Lane-Fall MB, Ramaswamy TS, Brown SES, He X, Gutsche JT, Fleisher LA, et  
618 al. Structural, Nursing, and Physician Characteristics and 30-Day Mortality for Patients  
619 Undergoing Cardiac Surgery in Pennsylvania. *Critical care medicine*. 2017;45(9):1472-  
620 80.  
621
- 622 7. Benjamin JE, Virani SS, Callaway WC, Chamberlain MA, Chang RA, Cheng ES,  
623 et al. Heart Disease and Stroke Statistics—2018 Update: A Report From the American  
624 Heart Association. *Circulation*. 2019;137(12):e67-e492.  
625
- 626 8. Goldfarb M, Bendayan M, Rudski LG, Morin JF, Langlois Y, Ma F, et al. Cost of  
627 Cardiac Surgery in Frail Compared With Nonfrail Older Adults. *The Canadian journal of*  
628 *cardiology*. 2017;33(8):1020-6.  
629
- 630 9. McConnell G, Woltz P, Bradford WT, Ledford JE, Williams JB. Enhanced  
631 recovery after cardiac surgery program to improve patient outcomes. *Nursing*.  
632 2018;48(11):24-31.  
633
- 634 10. The Society of Thoracic Surgeons. Performance Measures 2019  
635 [internet],Chicago (USA):The Society of Thoracic Surgeons; 2019 [updated 2019; cited  
636 2021 Aug 24]. Available from: [https://www.sts.org/quality-safety/performance-](https://www.sts.org/quality-safety/performance-measures)  
637 [measures](https://www.sts.org/quality-safety/performance-measures)].  
638
- 639 11. Khalil V, Danninger M, Wang W, Khalil H. An audit of adherence to heart failure  
640 guidelines in an Australian hospital: A pharmacist perspective. *Journal of Evaluation in*  
641 *Clinical Practice*. 2017;23(6):1195-202.  
642
- 643 12. Burnier M, Egan BM. Adherence in Hypertension: A Review of Prevalence, Risk  
644 Factors, Impact, and Management. *Circulation Research*. 2019;124(7):1124-40.  
645
- 646 13. Chan W, Chen A, Tiao D, Selinger C, Leong R. Medication adherence in  
647 inflammatory bowel disease. *Intestinal Research [Internet]*. 2017; 15(4):434-45.  
648
- 649 14. López-Campos JL, Quintana Gallego E, Carrasco Hernández L. Status of and  
650 strategies for improving adherence to COPD treatment. *International Journal of COPD*  
651 [Internet]. 2019; 14:1503-15.  
652
- 653 15. Moon SJ, Lee WY, Hwang JS, Hong YP, Morisky DE. Accuracy of a screening  
654 tool for medication adherence: A systematic review and meta-analysis of the Morisky  
655 Medication Adherence Scale-8. *PloS one*. 2017;12(11):e0187139.  
656

- 657 16. Witwer M, Dobbins G, Uher C, McFarren M. Auditing CAUTI Best Practices  
658 Bundle Adherence in a 24-bed Neurovascular/Cardiovascular/Intensive Care Unit. AJIC:  
659 American Journal of Infection Control. 2019;47(6 Supplement):S30.  
660
- 661 17. Larrazet F, Folliguet T, Laborde F, Bachet J, Hervé C. Mortality meetings: ethical  
662 considerations and adherence to evidence-based practice from 6 years of experience in  
663 a mixed cardiac department. European journal of cardio-thoracic surgery : official  
664 journal of the European Association for Cardio-thoracic Surgery. 2011;40(5):1039-45.  
665
- 666 18. Norful AA, Ye S, Van der-Biezen M, Poghosyan L. Nurse Practitioner-Physician  
667 Comanagement of Patients in Primary Care. Policy, politics & nursing practice.  
668 2018:1527154418815024.  
669
- 670 19. Reich E, Then K, Rankin J. Barriers to Clinical Practice Guideline Implementation  
671 for Septic Patients in the Emergency Department. Journal of Emergency Nursing.  
672 2018;44(6):552-62.  
673
- 674 20. Kleinpell. Outcome assessment in advanced practice nursing. New York, NY:  
675 Springer Publishing Company, LLC; 2017.  
676
- 677 21. Smigorowsky MJ, Sebastianski M, Sean McMurtry M, Tsuyuki RT, Norris CM.  
678 Outcomes of nurse practitioner-led care in patients with cardiovascular disease: A  
679 systematic review and meta-analysis. Journal of advanced nursing. 2020;76(1):81-95.  
680
- 681 22. Yang BK, Johantgen ME, Trinkoff AM, Idzik SR, Wince J, Tomlinson C. State  
682 Nurse Practitioner Practice Regulations and U.S. Health Care Delivery Outcomes: A  
683 Systematic Review. Medical care research and review : MCRR.  
684 2020:1077558719901216.  
685
- 686 23. Mares M, McNally S, Fernandez R. Effectiveness of nurse-led cardiac  
687 rehabilitation programs following coronary artery bypass graft surgery: a systematic  
688 review. 2018;16(12):2304-29.  
689
- 690 24. Audet L, Paquette L, Bordeleau S, Lavoie-Tremblay M, Kilpatrick K. The  
691 association between advanced practice nursing roles and outcomes in adults following  
692 cardiac surgery: A systematic review of randomized controlled trials. International  
693 journal of Nursing Studies. 2021.  
694
- 695 25. Kwak C, Ko Y. Clinical Nurse Specialist–Led Implementation of an Early  
696 Discharge Protocol After Cardiac Surgery. Clin Nurse Spec. 2019;33(4):184-90.  
697
- 698 26. Doyle L. A systematic review to enquire is Advanced Nurse Practitioner care  
699 more effective for the cardiac surgery patient, compared to standard care. European  
700 Journal of Cardiovascular Nursing. 2015;1:90.  
701

- 702 27. Hall MH, Esposito RA, Jahn L, Blenderman R, Hartman AR, Pekmezaris R, et al.  
703 Cardiac surgery nurse practitioner home visits prevent coronary artery bypass graft  
704 readmissions. *Annals of Thoracic Surgery*. 2014;97(5):1488-95.  
705
- 706 28. Southey D, Mishra PK, Nevill A, Aktuerk D, Luckraz H. Continuity of care by  
707 cardiothoracic nurse practitioners: Impact on outcome. *Asian Cardiovascular and*  
708 *Thoracic Annals*. 2014;22(8):944-7.  
709
- 710 29. Skinner H, Skoyles J, Redfearn S, Jutley R, Mitchell I, Richens D. Advanced care  
711 nurse practitioners can safely provide sole resident cover for level three patients: impact  
712 on outcomes, cost and work patterns in a cardiac surgery programme. *European*  
713 *Journal Of Cardio-Thoracic Surgery*. 2013;43(1):19-22.  
714
- 715 30. Bourgon Labelle J, Farand P, Vincelette C, Dumont M, Le Blanc M, Rochefort  
716 CM. Validation of an algorithm based on administrative data to detect new onset of atrial  
717 fibrillation after cardiac surgery. *BMC Medical Research Methodology*. 2020;20(1).  
718
- 719 31. Needleman J, Buerhaus P, Pankratz VS, Leibson CL, Stevens SR, Harris M.  
720 Nurse staffing and inpatient hospital mortality. *New England Journal of Medicine*.  
721 2011;364(11):1037-45.  
722
- 723 32. von Elm E, Altman DG, Egger M, Pocock SJ, Gøtzsche PC, Vandenbroucke JP.  
724 The Strengthening the Reporting of Observational Studies in Epidemiology (STROBE)  
725 Statement: guidelines for reporting observational studies. *International Journal Of*  
726 *Surgery (London, England)*. 2014;12(12):1495-9.  
727
- 728 33. Bourgon Labelle J. Associations entre les pratiques quotidiennes de gestion du  
729 personnel de soins et l'incidence de la fibrillation auriculaire postopératoire en chirurgie  
730 cardiaque. *Savoirs UdeS: Université de Sherbrooke*; 2020.  
731
- 732 34. Ordre des infirmières et infirmiers du Québec. Encadrement de la pratique des  
733 IPS Montréal [internet]. Québec (Can):Ordre des infirmières et infirmiers du  
734 Québec;2021 [updated 2021 cited 2021 Aug 24]. Available from:  
735 [https://www.oiq.org/en/pratique-professionnelle/pratique-avancee/ips/encadrement-de-](https://www.oiq.org/en/pratique-professionnelle/pratique-avancee/ips/encadrement-de-la-pratique-des-ips)  
736 [la-pratique-des-ips](https://www.oiq.org/en/pratique-professionnelle/pratique-avancee/ips/encadrement-de-la-pratique-des-ips)  
737
- 738 35. Hoffman LA, Guttendorf J. Integrating Nurse Practitioners into the Critical Care  
739 Team. *Critical Care Alert*. 2014;21(12).  
740
- 741 36. Canadian Institute of Health Information. Canadian Coding Standards for ICD-10-  
742 CA and CCI [internet].Ottawa (Can):Canadian Institute of Health Information; 2019  
743 [updated 2019 cited 2021 Aug 24]. Available from:  
744 <https://secure.cihi.ca/estore/productSeries.htm?pc=PCC189>.  
745

- 746 37. Yenipinar A, Koç Ş, Çanga D, Kaya F. Determining Sample Size in Logistic  
747 Regression with G-Power. *Black Sea Journal of Engineering and Science*.  
748 2019;2(1):16-22.  
749
- 750 38. Coleman N, Halas G, Peeler W, Casaclang N, Williamson T, Katz A. From  
751 patient care to research: a validation study examining the factors contributing to data  
752 quality in a primary care electronic medical record database. *BMC Family Practice*  
753 [Internet]. 2015; 16(1):11.  
754
- 755 39. Sudeh C-S, Hardeep S, David R, Jill S, Morris R, Aneez E, et al. Missed  
756 diagnostic opportunities and English general practice: a study to determine their  
757 incidence, confounding and contributing factors and potential impact on patients through  
758 retrospective review of electronic medical records. *Implementation Science* [Internet].  
759 2015; 10(1):105.  
760
- 761 40. Tremblay J-A, Laramée P, Lamarche Y, Denault A, Beaubien-Souligny W,  
762 Frenette A-J, et al. Potential risks in using midodrine for persistent hypotension after  
763 cardiac surgery: a comparative cohort study. *Annals of intensive care*. 2020;10(1):1-8.  
764
- 765 41. Kuhns BD, Hannon CP, Makhni EC, Alter J, Mather RC, 3rd, Salata MJ, et al. A  
766 Comparison of Clinical Outcomes After Unilateral or Bilateral Hip Arthroscopic Surgery:  
767 Age- and Sex-Matched Cohort Study. *The American journal of sports medicine*.  
768 2017;45(13):3044-51.  
769
- 770 42. Ravi B, Pincus D, Wasserstein D, Govindarajan A, Huang A, Austin PC, et al.  
771 Association of Overlapping Surgery With Increased Risk for Complications Following  
772 Hip Surgery: A Population-Based, Matched Cohort Study. *JAMA internal medicine*.  
773 2018;178(1):75-83.  
774
- 775 43. Oichi T, Chikuda H, Ohya J, Ohtomo R, Morita K, Matsui H, et al. Mortality and  
776 morbidity after spinal surgery in patients with Parkinson's disease: a retrospective  
777 matched-pair cohort study. *Spine journal*. 2017;17(4):531-7.  
778
- 779 44. Charlson ME, Pompei P, Ales KL, MacKenzie CR. A new method of classifying  
780 prognostic comorbidity in longitudinal studies: development and validation. *Journal of*  
781 *chronic diseases*. 1987;40(5):373-83.  
782
- 783 45. Quan H, Li B, Couris CM, Fushimi K, Graham P, Hider P, et al. Updating and  
784 validating the Charlson comorbidity index and score for risk adjustment in hospital  
785 discharge abstracts using data from 6 countries. *American Journal of Epidemiology*.  
786 2011;173(6):676-82.  
787
- 788 46. Terwee CB, Prinsen C, Chiarotto A, de Vet H, Bouter LM, Alonso J, et al.  
789 COSMIN methodology for assessing the content validity of PROMs—user manual.  
790 Amsterdam: VU University Medical Center. 2018.  
791

- 792 47. Holt TP, Loraas TM. Using qualtrics panels to source external auditors: A  
793 replication study. *Journal of Information Systems*. 2019;33(1):29-41.  
794
- 795 48. Streiner DL, Norman GR, Cairney J. *Health measurement scales : a practical*  
796 *guide to their development and use*. Oxford: Oxford University Press; 2015.  
797
- 798 49. Grant JS, Davis LL. Selection and use of content experts for instrument  
799 development. *Research in nursing & health*. 1997;20(3):269-74.  
800
- 801 50. O'Brien SMP, Shahian DMMD, DeLong ERP, Normand S-LTP, Edwards FHMD,  
802 Ferraris VAMD, et al. Quality Measurement in Adult Cardiac Surgery: Part 2—Statistical  
803 Considerations in Composite Measure Scoring and Provider Rating. *The Annals of*  
804 *Thoracic Surgery*. 2007;83(4 Supplement):S13-S26.  
805
- 806 51. Shahian D, Edwards F, Ferraris V, Haan C, Rich J, Normand S, et al. Quality  
807 Measurement in Adult Cardiac Surgery: Part 1—Conceptual Framework and Measure  
808 Selection. *The Annals of Thoracic Surgery*. 2007;83(4 Supplement):S3-S12.  
809
- 810 52. Dubois CA, D'Amour D, Tchouaket E, Clarke S, Rivard M, Blais R. Associations  
811 of patient safety outcomes with models of nursing care organization at unit level in  
812 hospitals. *International journal for quality in health care : journal of the International*  
813 *Society for Quality in Health Care*. 2013;25(2):110-7.  
814
- 815 53. Gearing RE, Mian IA, Barber J, Ickowicz A. A methodology for conducting  
816 retrospective chart review research in child and adolescent psychiatry. *Journal of the*  
817 *Canadian Academy of Child and Adolescent Psychiatry*. 2006;15(3):126-34.  
818  
819
- 820 54. Vassar M, Holzmann M. The retrospective chart review: important  
821 methodological considerations. *Journal of educational evaluation for health professions*.  
822 2013;10:12.  
823
- 824 55. McHugh ML. Interrater reliability: the kappa statistic. *Biochemia medica*.  
825 2012;22(3):276-82.  
826
- 827 56. Tchouaket E, Boivin S, Robins S, Sia D, Kilpatrick K, Brousseau S, et al.  
828 Development and validation of a time and motion guide to assess the costs of  
829 prevention and control interventions for nosocomial infections: A Delphi method among  
830 experts. *PLoS ONE [Internet]*. 2020; 15(11).  
831
- 832 57. Rym B, Hendy A, Marine L, Olivier S, Corinne A. Using and reporting the Delphi  
833 method for selecting healthcare quality indicators: a systematic review. *PLoS ONE*  
834 *[Internet]*. 2011; 6(6).  
835

836 58. Polit DF, Beck CT, Owen SV. Is the CVI an acceptable indicator of content  
837 validity? Appraisal and recommendations. *Research in Nursing & Health*.  
838 2007;30(4):459-67.  
839

840 59. Vaismoradi M, Salsali M, Turunen H, Bondas T. A qualitative study on Iranian  
841 nurses' experiences and perspectives on how to provide safe care in clinical practice.  
842 *Journal of Research in Nursing*. 2013;18(4):351-65.  
843

844 60. Tabachnick, Fidell. *Using multivariate statistics*. Sixth edition.. ed. Fidell L, editor:  
845 Boston : Pearson Education; 2013.  
846

847 61. Ibrahim JG, Chu H, Chen M-H. Missing data in clinical studies: issues and  
848 methods. *J Clin Oncol*. 2012;30(26):3297.  
849

850 62. Armstrong RA. When to use the Bonferroni correction. *Ophthalmic &*  
851 *physiological optics : the journal of the British College of Ophthalmic Opticians*  
852 *(Optometrists)*. 2014;34(5):502-8.  
853

854 63. Daoud JI, editor *Multicollinearity and regression analysis*. *Journal of Physics:*  
855 *Conference Series*; 2017: IOP Publishing.  
856

857 64. Kilpatrick K, Tchouaket E, Carter N, Bryant-Lukosius D, DiCenso A. Structural  
858 and Process Factors That Influence Clinical Nurse Specialist Role Implementation.  
859 *Clinical Nurse Specialist*. 2016;30(2):89-100.  
860

861 65. Olive DJ. *Linear regression*. Cham, Switzerland: Springer; 2017.  
862

863 66. Ramakrishnan N, Hanauer D, Keller B. Mining electronic health records.  
864 *Computer*. 2010;43(10):77-81.  
865  
866

867  
868  
869  
870  
871  
872  
873

**Figure 1. The confounding variables and the level of adherence to best-practice guidelines by interprofessional teams with and without acute care nurse practitioners in cardiac surgery**

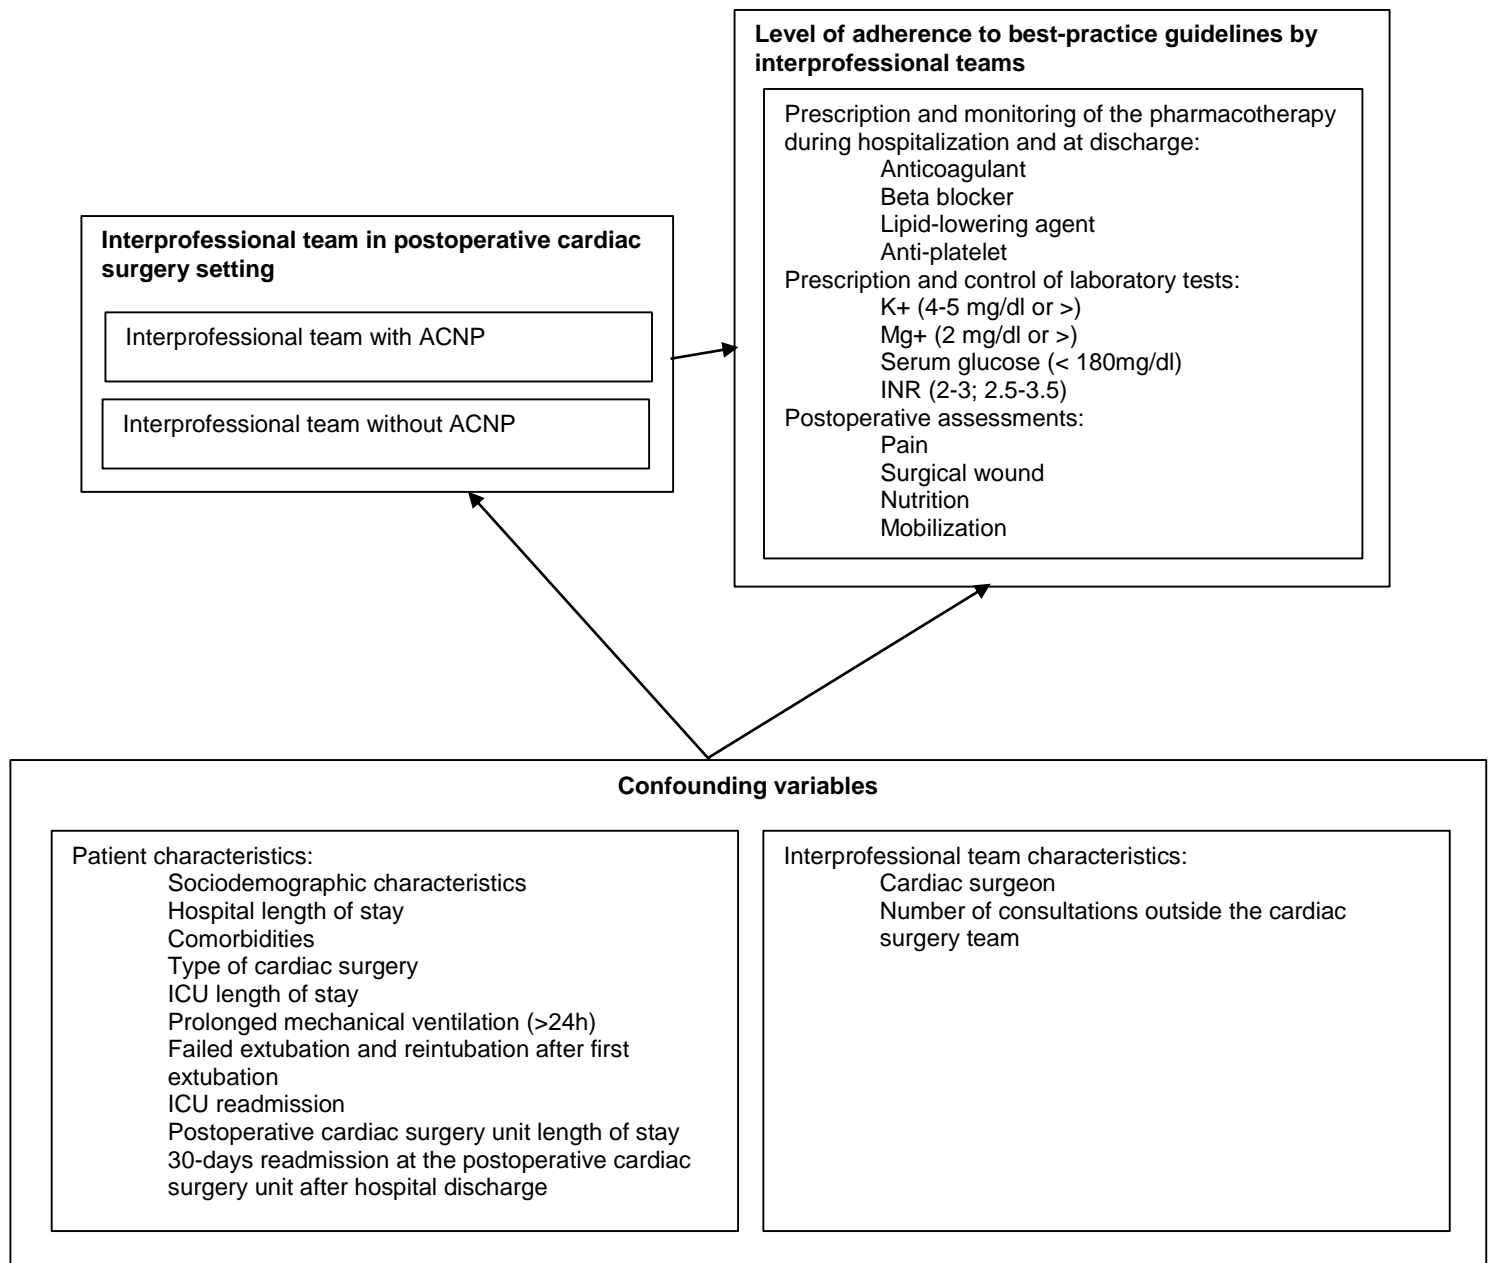

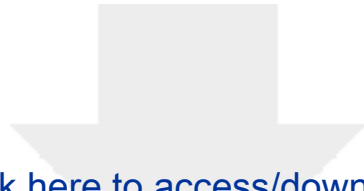

Click here to access/download  
**Supporting Information**  
supporting\_information.docx

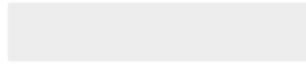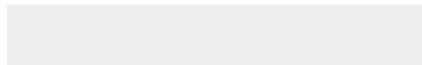

Supplement: pone.0282467.s005.pdf [file pone.0282467.s005.pdf]
