# Supplementary material for: The level of adherence to best-practice guidelines by interprofessional teams with and without acute care nurse practitioners in cardiac surgery: A study protocol
Source: PubMed Central journal article supplement (PMC9976998; doi:10.1371/journal.pone.0282467), 2023-03-01
Supplement: pone.0282467.s006.pdf [file pone.0282467.s006.pdf]

# PLOS ONE

## The level of adherence to best-practice guidelines by interprofessional teams with and without acute care nurse practitioners in cardiac surgery: a study protocol

--Manuscript Draft--

|                               |                                                                                                                                                                                                                                                                                                                                                                                                                                                                                                                                                                                                                                                                                                                                                                                                                                                                                                                                                                                                                                                                                                                                                                                                                                                                                                                                                                                                                                                                                                                                                                                                                                                                                                                                                                                                                                                                                                                                                                                                                                                                                                                                                                                                                                                                                                                            |
|-------------------------------|----------------------------------------------------------------------------------------------------------------------------------------------------------------------------------------------------------------------------------------------------------------------------------------------------------------------------------------------------------------------------------------------------------------------------------------------------------------------------------------------------------------------------------------------------------------------------------------------------------------------------------------------------------------------------------------------------------------------------------------------------------------------------------------------------------------------------------------------------------------------------------------------------------------------------------------------------------------------------------------------------------------------------------------------------------------------------------------------------------------------------------------------------------------------------------------------------------------------------------------------------------------------------------------------------------------------------------------------------------------------------------------------------------------------------------------------------------------------------------------------------------------------------------------------------------------------------------------------------------------------------------------------------------------------------------------------------------------------------------------------------------------------------------------------------------------------------------------------------------------------------------------------------------------------------------------------------------------------------------------------------------------------------------------------------------------------------------------------------------------------------------------------------------------------------------------------------------------------------------------------------------------------------------------------------------------------------|
| <b>Manuscript Number:</b>     | PONE-D-21-40085R1                                                                                                                                                                                                                                                                                                                                                                                                                                                                                                                                                                                                                                                                                                                                                                                                                                                                                                                                                                                                                                                                                                                                                                                                                                                                                                                                                                                                                                                                                                                                                                                                                                                                                                                                                                                                                                                                                                                                                                                                                                                                                                                                                                                                                                                                                                          |
| <b>Article Type:</b>          | Study Protocol                                                                                                                                                                                                                                                                                                                                                                                                                                                                                                                                                                                                                                                                                                                                                                                                                                                                                                                                                                                                                                                                                                                                                                                                                                                                                                                                                                                                                                                                                                                                                                                                                                                                                                                                                                                                                                                                                                                                                                                                                                                                                                                                                                                                                                                                                                             |
| <b>Full Title:</b>            | The level of adherence to best-practice guidelines by interprofessional teams with and without acute care nurse practitioners in cardiac surgery: a study protocol                                                                                                                                                                                                                                                                                                                                                                                                                                                                                                                                                                                                                                                                                                                                                                                                                                                                                                                                                                                                                                                                                                                                                                                                                                                                                                                                                                                                                                                                                                                                                                                                                                                                                                                                                                                                                                                                                                                                                                                                                                                                                                                                                         |
| <b>Short Title:</b>           | Adherence to best-practice guidelines by interprofessional teams with and without nurse practitioners                                                                                                                                                                                                                                                                                                                                                                                                                                                                                                                                                                                                                                                                                                                                                                                                                                                                                                                                                                                                                                                                                                                                                                                                                                                                                                                                                                                                                                                                                                                                                                                                                                                                                                                                                                                                                                                                                                                                                                                                                                                                                                                                                                                                                      |
| <b>Corresponding Author:</b>  | Li-Anne Audet, MSc<br>McGill University Faculty of Medicine and Health Sciences<br>Montreal, Quebec CANADA                                                                                                                                                                                                                                                                                                                                                                                                                                                                                                                                                                                                                                                                                                                                                                                                                                                                                                                                                                                                                                                                                                                                                                                                                                                                                                                                                                                                                                                                                                                                                                                                                                                                                                                                                                                                                                                                                                                                                                                                                                                                                                                                                                                                                 |
| <b>Keywords:</b>              | Acute care nurse practitioner, best-practice guidelines, cardiac surgery, interprofessional teams, quality of care                                                                                                                                                                                                                                                                                                                                                                                                                                                                                                                                                                                                                                                                                                                                                                                                                                                                                                                                                                                                                                                                                                                                                                                                                                                                                                                                                                                                                                                                                                                                                                                                                                                                                                                                                                                                                                                                                                                                                                                                                                                                                                                                                                                                         |
| <b>Abstract:</b>              | <p><b>Background</b><br/>Acute care nurse practitioners (ACNP) have been implemented in postoperative cardiac surgery settings and have shown to provide significant benefits to patients and organizations. To explain these associations, recent studies have suggested that ACNP increase the level of adherence to best-practice guidelines by interprofessional teams. However, it is unknown if interprofessional teams with ACNP are associated with higher levels of adherence to best-practice guidelines compared to interprofessional teams without ACNP. Furthermore, no extraction tool is available to measure the level of adherence to best-practice guidelines by interprofessional teams in postoperative cardiac surgery settings. This project aims to examine the level of adherence to best-practice guidelines of interprofessional teams with and without ACNP in a postoperative cardiac surgery setting in Québec, Canada.</p> <p><b>Methods</b><br/>A retrospective observational study will be conducted of 300 patients hospitalized between January 1, 2019 and January 31, 2020 in a postoperative cardiac surgery unit in Québec, Canada. Data will be collected from patient health records and electronic databases. An extraction tool will be developed based on systematic review of the literature, and will include best-practice guidelines and confounding variables related to patient and interprofessional teams' characteristics. Content and criterion validation, and a pilot-test will be conducted for the development of the tool. A multivariate linear regression model will be developed and adjusted for several confounding variables, in order to examine the association between interprofessional teams with and without ACNP, and the level of adherence to best-practice guidelines.</p> <p><b>Discussion</b><br/>This project represents the first study to examine the level of adherence to best-practice guidelines by interprofessional teams with and without ACNP in a postoperative cardiac surgery setting. The findings of this project will generate empirical data focusing on the contribution of ACNP within interprofessional teams, and ultimately enhance the delivery of high quality and evidence-based care for patients and families.</p> |
| <b>Order of Authors:</b>      | Li-Anne Audet, MSc<br>Mélanie Lavoie-Tremblay, PhD<br>Éric Tchouaket, PhD<br>Kelley Kilpatrick, PhD                                                                                                                                                                                                                                                                                                                                                                                                                                                                                                                                                                                                                                                                                                                                                                                                                                                                                                                                                                                                                                                                                                                                                                                                                                                                                                                                                                                                                                                                                                                                                                                                                                                                                                                                                                                                                                                                                                                                                                                                                                                                                                                                                                                                                        |
| <b>Response to Reviewers:</b> | September 13th, 2022                                                                                                                                                                                                                                                                                                                                                                                                                                                                                                                                                                                                                                                                                                                                                                                                                                                                                                                                                                                                                                                                                                                                                                                                                                                                                                                                                                                                                                                                                                                                                                                                                                                                                                                                                                                                                                                                                                                                                                                                                                                                                                                                                                                                                                                                                                       |

To the Editor of Plos One,

We thank the reviewer and the editor for their thoughtful comments and have summarized our modifications to the manuscript addressing their questions and suggestions in the table attached with our submission.

Please do not hesitate to contact us if you require any additional information or have any further questions.

We will look forward to hearing from you.

Sincerely,  
Li-Anne Audet

**Additional Information:**

| Question | Response |
|----------|----------|
|----------|----------|

|                                                                                                                                                                                                                                                                                                                                                                                                                                                                                                     |                                                                                                                                                                                                                                                                                                                                                                                                                                                                                                                                                                                                                                                                                                                                                                                                                |
|-----------------------------------------------------------------------------------------------------------------------------------------------------------------------------------------------------------------------------------------------------------------------------------------------------------------------------------------------------------------------------------------------------------------------------------------------------------------------------------------------------|----------------------------------------------------------------------------------------------------------------------------------------------------------------------------------------------------------------------------------------------------------------------------------------------------------------------------------------------------------------------------------------------------------------------------------------------------------------------------------------------------------------------------------------------------------------------------------------------------------------------------------------------------------------------------------------------------------------------------------------------------------------------------------------------------------------|
| <p><b>Financial Disclosure</b></p> <p>Enter a financial disclosure statement that describes the sources of funding for the work included in this submission. Review the <a href="#">submission guidelines</a> for detailed requirements. View published research articles from <a href="#">PLOS ONE</a> for specific examples.</p> <p>This statement is required for submission and <b>will appear in the published article</b> if the submission is accepted. Please make sure it is accurate.</p> | <p>This project is funded by the Réseau de recherche en intervention en sciences infirmières du Québec (RRISIQ). LAA holds doctoral scholarships from the Fonds de recherche du Québec – santé as well as from the Québec Ministry of Education (Ministère de l'Éducation et de l'Enseignement Supérieur du Québec). ET holds a career award from the Fonds de recherche du Québec – Santé (Junior 2 Research Salary Award). KK holds a career award from the Fonds de recherche du Québec – Santé (Senior Research Salary Award) and holder of the Susan E. French Chair in Nursing Research and Innovative Practice. No funding sources were involved in the study conception and design, data collection, analysis, interpretation, or in the final decision to submit this manuscript for publication.</p> |
|-----------------------------------------------------------------------------------------------------------------------------------------------------------------------------------------------------------------------------------------------------------------------------------------------------------------------------------------------------------------------------------------------------------------------------------------------------------------------------------------------------|----------------------------------------------------------------------------------------------------------------------------------------------------------------------------------------------------------------------------------------------------------------------------------------------------------------------------------------------------------------------------------------------------------------------------------------------------------------------------------------------------------------------------------------------------------------------------------------------------------------------------------------------------------------------------------------------------------------------------------------------------------------------------------------------------------------|

**Unfunded studies**

Enter: *The author(s) received no specific funding for this work.*

**Funded studies**

Enter a statement with the following details:

- Initials of the authors who received each award
- Grant numbers awarded to each author
- The full name of each funder
- URL of each funder website
- Have or will the sponsors or funders play any role in the study design, data collection (when applicable) and analysis, decision to publish, or preparation of the manuscript?
- **NO** - Include this sentence at the end of your statement: *The funders had and will not have a role in study design, data collection and analysis, decision to publish, or preparation of the manuscript.*
- **YES** - Specify the role(s) played.

\* typeset

**Competing Interests**

Use the instructions below to enter a competing interest statement for this submission. On behalf of all authors, disclose any [competing interests](#) that could be perceived to bias this work—acknowledging all financial support and any other relevant financial or non-financial competing interests.

This statement is **required** for submission and **will appear in the published article** if the submission is accepted. Please make sure it is accurate and that any funding sources listed in your Funding Information later in the submission form are also declared in your Financial Disclosure statement.

View published research articles from [PLOS ONE](#) for specific examples.

The authors have declared that non competing interests exist.

**NO authors have competing interests**

Enter: *The authors have declared that no competing interests exist.*

**Authors with competing interests**

Enter competing interest details beginning with this statement:

*I have read the journal's policy and the authors of this manuscript have the following competing interests: [insert competing interests here]*

\* typeset

**Ethics Statement**

Enter an ethics statement for this submission. This statement is required if the study involved:

- Human participants
- Human specimens or tissue
- Vertebrate animals or cephalopods
- Vertebrate embryos or tissues
- Field research

Write "N/A" if the submission does not require an ethics statement.

General guidance is provided below. Consult the [submission guidelines](#) for detailed instructions. **Make sure that all information entered here is included in the Methods section of the manuscript.**

Ethics approval:  
 Final REB Approval of a New Research Project  
 The level of adherence to best-practice guidelines of interprofessionnel teams with and without adult care nurse practitioner in postoperative cardiac surgery: a retrospective observational study (IPSSA chirurgiecardiaque / 2022-8094)  
 MUHC REB Co-Chair for the CTGQ panel: Me Marie Hirtle

Dear Dr. Lavoie-Tremblay,  
 Thank you for submitting your responses and corrections for the research project indicated above, as requested by the McGill University Health Centre (MUHC) Research Ethics Board (REB).  
 The MUHC REB, more precisely its Cells, Tissues, Genetics & Qualitative (CTGQ) research panel provided conditional approval for the research project after a delegated review provided by its member(s).  
 On 2021-09-15, a delegated review of your responses and corrections was provided by member(s) of the MUHC REB. The research project was found to meet scientific and ethical standards for conduct at the MUHC.

The following documents were approved or acknowledged by the MUHC REB:  
 Initial Submission Form (F11NIR-80464)  
 REB Conditions & PI Responses Form(s) (F20-82210, F20-83659) Documents utilisés pour le recrutement  
 (Poster\_Fr\_V2\_2021-08-23\_REB Approved.docx) [date : 2021-08-23]  
 (Poster\_Eng\_V2\_2021-08-23\_REB Approved.docx) [date : 2021-08-23] Protocole de recherche  
 (Research\_proposal\_Li-AnneAudet\_V2\_2021-08-23\_Fr\_REB Approved.docx) [date : 2021-08-23]  
 Documents utilisés pour le recrutement  
 (Recruitment\_email\_Fr\_V2\_2021-08-23\_REB Approved.docx) [date : 2021-08-23]  
 (Recruitment\_email\_Eng\_V2\_2021-08-23\_REB Approved.docx) [date : 2021-08-23]  
 Questionnaire(s) et matériel de recherche  
 (Qualtrics\_questionnaire\_Fr\_REB Approved.docx) [date : 2021-09-06]  
 (Qualtrics\_questionnaire\_Eng\_REB Approved.docx) [date : 2021-09-06]  
 (Extraction\_tool\_Fr\_REB Approved.docx)  
 (Extraction\_tool\_Eng\_REB Approved.docx)

|                                                                                                                                                                                                                                                                                                                                                                                                                                                                                                                                                                                                                                                                                                                                                                                                                                                                                                                                                                                                                                                                                                                                                                                                                                                                                                                                                                                                                                                                                                                                                                                                                           |                                                                                                                                                                                                                                                                                                                                                                                                                                                                                                                                                                                                                                                                                                                                                                                                                                                                                                                                                                                                                                                                                                                                                                                                                                                                                                                                                                                                                                                                                                                                                                                                                                                                                                                                  |
|---------------------------------------------------------------------------------------------------------------------------------------------------------------------------------------------------------------------------------------------------------------------------------------------------------------------------------------------------------------------------------------------------------------------------------------------------------------------------------------------------------------------------------------------------------------------------------------------------------------------------------------------------------------------------------------------------------------------------------------------------------------------------------------------------------------------------------------------------------------------------------------------------------------------------------------------------------------------------------------------------------------------------------------------------------------------------------------------------------------------------------------------------------------------------------------------------------------------------------------------------------------------------------------------------------------------------------------------------------------------------------------------------------------------------------------------------------------------------------------------------------------------------------------------------------------------------------------------------------------------------|----------------------------------------------------------------------------------------------------------------------------------------------------------------------------------------------------------------------------------------------------------------------------------------------------------------------------------------------------------------------------------------------------------------------------------------------------------------------------------------------------------------------------------------------------------------------------------------------------------------------------------------------------------------------------------------------------------------------------------------------------------------------------------------------------------------------------------------------------------------------------------------------------------------------------------------------------------------------------------------------------------------------------------------------------------------------------------------------------------------------------------------------------------------------------------------------------------------------------------------------------------------------------------------------------------------------------------------------------------------------------------------------------------------------------------------------------------------------------------------------------------------------------------------------------------------------------------------------------------------------------------------------------------------------------------------------------------------------------------|
| <p><b>Format for specific study types</b></p> <p><b>Human Subject Research (involving human participants and/or tissue)</b></p> <ul style="list-style-type: none"> <li>• Give the name of the institutional review board or ethics committee that approved the study</li> <li>• Include the approval number and/or a statement indicating approval of this research</li> <li>• Indicate the form of consent obtained (written/oral) or the reason that consent was not obtained (e.g. the data were analyzed anonymously)</li> </ul> <p><b>Animal Research (involving vertebrate animals, embryos or tissues)</b></p> <ul style="list-style-type: none"> <li>• Provide the name of the Institutional Animal Care and Use Committee (IACUC) or other relevant ethics board that reviewed the study protocol, and indicate whether they approved this research or granted a formal waiver of ethical approval</li> <li>• Include an approval number if one was obtained</li> <li>• If the study involved <i>non-human primates</i>, add <i>additional details</i> about animal welfare and steps taken to ameliorate suffering</li> <li>• If anesthesia, euthanasia, or any kind of animal sacrifice is part of the study, include briefly which substances and/or methods were applied</li> </ul> <p><b>Field Research</b></p> <p>Include the following details if this study involves the collection of plant, animal, or other materials from a natural setting:</p> <ul style="list-style-type: none"> <li>• Field permit number</li> <li>• Name of the institution or relevant body that granted permission</li> </ul> | <p>FIC approuvé(s) par le CÉR<br/> (ICF_Fr_V2_2021-08-23_REB Approved.docx) [Date: 2021-08-23]<br/> (ICF_Eng_V2_2021-08-23_REB Approved.docx) [Date: 2021-08-23]</p> <p>This will be reported to the MUHC REB and will be entered accordingly into the minutes of the next CTGQ meeting. Please be advised that you may only initiate the study after all required reviews and decisions are received and documented and you have received the MUHC authorization letter.</p> <p>Scientific approval:<br/> Dear Li-Anne,<br/> On behalf the IsoN Comprehensive Examination Committee, I am pleased to confirm that you successfully passed your PhD comprehensive examination on April 13, 2021 for your project entitled: <i>Le niveau d'adhérence aux pratiques exemplaires des équipes interprofessionnelles avec et sans infirmières praticiennes spécialisées en soins aux adultes en contexte de chirurgie cardiaque : une étude observationnelle rétrospective.</i> Your comprehensive examination (both your written protocol and oral presentation of your proposed thesis research) demonstrated that you have sufficient strength in terms of scientific knowledge, originality of thought and the capacity for clear expression to continue your doctoral research.<br/> The Comprehensive Examination Committee members (external examiners) were: Dr. Christine Maheu (Associate Professor, ISoN, Chair of the Comprehensive Examination Committee) and Dr. Andraea Van Hulst (Associate Professor, ISoN).<br/> You have now advanced to the status of doctoral candidate. Congratulations on this important milestone, and we wish you success with the completion of your doctoral research.<br/> Sincerely,</p> |
| <p><b>Data Availability</b></p> <p>Authors are required to make the data underlying their research findings fully available, without restriction.</p> <p>If the manuscript reports pilot or preliminary results, the data underlying those results must be made available at the time of publication. A Data Availability</p>                                                                                                                                                                                                                                                                                                                                                                                                                                                                                                                                                                                                                                                                                                                                                                                                                                                                                                                                                                                                                                                                                                                                                                                                                                                                                             | <p>N/A - the protocol does not report results</p>                                                                                                                                                                                                                                                                                                                                                                                                                                                                                                                                                                                                                                                                                                                                                                                                                                                                                                                                                                                                                                                                                                                                                                                                                                                                                                                                                                                                                                                                                                                                                                                                                                                                                |

Statement describing where the data can be found is required at submission. Your answers to this question constitute the Data Availability Statement and will be published in the article, if accepted. When legal or ethical requirements prohibit public data sharing, authors must indicate how researchers may obtain access to the data. See the [PLOS Data Policy](#) and [FAQ](#) for detailed information.

**Important:** Stating 'data available on request from the author' is not sufficient. If your data are only available upon request, select 'No' for the first question and explain your situation in the text box.

For protocols without pilot or preliminary data, authors are strongly encouraged to state how they plan to share research data from their study when it is completed or published.

Do the authors confirm that EITHER the protocol does not report results OR all data underlying the preliminary results will be made fully available without restriction?

**Describe where the data may be found in full sentences. If you are copying our sample text, replace any instances of XXX with the appropriate details.**

- If **no pilot data are reported** in the manuscript, please enter the following:  
*No datasets were generated or analysed during the current study. All relevant data from this study will be made available upon study completion.*
- If the manuscript reports pilot data **held in a public repository**, include URLs, accession numbers or DOIs. If this information will only be available after acceptance, indicate this by ticking the box below. For example: *All XXX files are available from the XXX database*

No datasets were generated or analysed during the current study. All relevant data from this study will be made available upon study completion.

(accession number(s) **XXX, XXX**).

- If the manuscript reports pilot data contained **within the manuscript and/or Supporting Information files**, enter the following:

*All relevant data are within the manuscript and its Supporting Information files.*

- If neither of these applies but you are able to provide **details of access elsewhere**, with or without limitations, please do so. For example:

*Data cannot be shared publicly because of [XXX]. Data are available from the **XXX** Institutional Data Access / Ethics Committee (contact via **XXX**) for researchers who meet the criteria for access to confidential data.*

*The data underlying the results presented in the study are available from (include the name of the third party and contact information or URL).*

- This text is appropriate if the data are owned by a third party and authors do not have permission to share the data.

For study protocols with data management or sharing plans, authors are encouraged to briefly describe in their Data Availability Statement how data they generate will be made accessible when the study is completed. For example:

- Deidentified research data will be made publicly available when the study is completed and published.

\* typeset

Additional data availability information:

1  
2 **The level of adherence to best-practice guidelines by interprofessional teams**  
3 **with and without acute care nurse practitioners in cardiac surgery: a study**  
4 **protocol**  
5  
6

7 **Authors and affiliations:** Li-Anne Audet, RN.<sup>1</sup>, M.Sc, Mélanie Lavoie-Tremblay, RN.<sup>2</sup>,  
8 Ph.D, Éric Tchouaket, Ph.D<sup>3</sup>, Kelley Kilpatrick, RN., Ph.D<sup>1,4,5</sup>  
9

10  
11 <sup>1</sup> McGill University, Ingram School of Nursing, Faculty of Medicine and Health Sciences,  
12 680 Sherbrooke West, Suite 1800, Montreal, QC, Canada, H3A2M7  
13

14 <sup>2</sup> Université de Montréal, Faculté des sciences infirmières, Pavillon Marguerite-  
15 d'Youville, 2375 chemin de la Côte-Ste-Catherine, Montreal, QC, Canada, H3T1A8  
16

17 <sup>3</sup> Université du Québec en Outaouais, Département des sciences infirmières, 5 rue  
18 Saint-Joseph, Saint-Jérôme, QC, Canada, J7Z0B7  
19

20 <sup>4</sup> Centre intégré universitaire de santé et de services sociaux de l'Est-de-l'Île-de-  
21 Montréal-Hôpital Maisonneuve-Rosemont (CIUSSS-EMTL-HMR), 5415, boulevard de  
22 l'Assomption, Montreal, QC, Canada, H1T 2M4  
23

24 <sup>5</sup> Susan E. French Chair in Nursing Research and Innovative Practice, McGill University,  
25 Ingram School of Nursing, Faculty of Medicine and Health Sciences, 680 Sherbrooke  
26 West, Suite 1800, Montreal, QC, Canada, H4A 2M7  
27

28 **Corresponding author:** Li-Anne Audet, Ingram School of Nursing, McGill University,  
29 680 Sherbrooke Street West, Montreal, QC, H3A2M7, Email address: [li-  
30 anne.audet@mail.mcgill.ca](mailto:li-anne.audet@mail.mcgill.ca)

31 Word count: 5,721  
32  
33  
34  
35  
36  
37  
38



39

40 **The level of adherence to best-practice guidelines by interprofessional teams**  
41 **with and without acute care nurse practitioners in cardiac surgery: a study**  
42 **protocol**

43 **Short title**

44 Adherence to best-practice guidelines by interprofessional teams with and without acute  
45 care nurse practitioners

46 **Abstract**

47 **Background**

48 Acute care nurse practitioners (ACNP) have been implemented in postoperative cardiac  
49 surgery settings and have shown to provide significant benefits to patients and  
50 organizations. To explain these associations, recent studies have suggested that ACNP  
51 increase the level of adherence to best-practice guidelines by interprofessional teams.  
52 However, it is unknown if interprofessional teams with ACNP are associated with higher  
53 levels of adherence to best-practice guidelines compared to interprofessional teams  
54 without ACNP. Furthermore, no extraction tool is available to measure the level of  
55 adherence to best-practice guidelines by interprofessional teams in postoperative  
56 cardiac surgery settings. This project aims to examine the level of adherence to best-  
57 practice guidelines of interprofessional teams with and without ACNP in a postoperative  
58 cardiac surgery setting in Québec, Canada.

59 **Methods**

60 A retrospective observational study will be conducted of 300 patients hospitalized  
61 between January 1, 2019 and January 31, 2020 in a postoperative cardiac surgery unit

62 in Québec, Canada. Data will be collected from patient health records and electronic  
63 databases. An extraction tool will be developed based on systematic review of the  
64 literature, and will include best-practice guidelines and confounding variables related to  
65 patient and interprofessional teams' characteristics. Content and criterion validation,  
66 and a pilot-test will be conducted for the development of the tool. A multivariate linear  
67 regression model will be developed and adjusted for several confounding variables, in  
68 order to examine the association between interprofessional teams with and without  
69 ACNP, and the level of adherence to best-practice guidelines.

## 70 **Discussion**

71 This project represents the first study to examine the level of adherence to best-practice  
72 guidelines by interprofessional teams with and without ACNP in a postoperative cardiac  
73 surgery setting. The findings of this project will generate empirical data focusing on the  
74 contribution of ACNP within interprofessional teams, and ultimately enhance the  
75 delivery of high quality and evidence-based care for patients and families.

## 76 **Keywords**

77 Acute care nurse practitioner, best-practice guidelines, cardiac surgery,  
78 interprofessional teams, quality of care

79

80

81

82

83

84

85 **Background**

86 Cardiac surgeries are one of the leading types of surgical procedures performed  
87 internationally. In 2017, approximately 1 million patients throughout the world underwent  
88 a cardiac surgery (1). Most cardiac surgeries are performed in developed countries (1).  
89 In 2018, the Society of Thoracic Surgeons (STS) reported 287,872 cardiac surgeries  
90 and procedures performed in the United States (2). In Canada, 42,989 coronary artery  
91 bypass grafts (CABG) and 7,186 valve repairs were performed between 2013 and 2016  
92 (3, 4).

93 In the postoperative phase after the surgery, many patients are at high risk of  
94 developing adverse events and postoperative complications such as myocardial  
95 infarction and wound infection (5). These complications are associated with higher risk  
96 of mortality and development of comorbidities (e.g., heart failure), as well as a decrease  
97 in the well-being and quality of life of patients and families (6). For healthcare  
98 organizations, adverse events and postoperative complications are associated with a  
99 longer length of stay at the hospital, higher rates of readmission in intensive care units,  
100 higher rates of surgical re exploration, and an increase in cost (7, 8).

101 To prevent the risk of adverse events and postoperative complications for  
102 patients and families, international healthcare organizations and research teams have  
103 developed best-practice guidelines (7, 9). Best-practice guidelines are defined as  
104 evidence-based practice of care, and aim to ensure the performance of  
105 interprofessional teams, enhancing the quality and safety of the care given to patients  
106 and families. In postoperative cardiac surgery settings, best-practice guidelines related  
107 to the pharmacotherapy, laboratory tests, clinical indicators, and lifestyle promotion

108 (e.g., diet, cardiac rehabilitation) have been developed and implemented in healthcare  
109 centres (2).

110 A consensus in the literature supports the importance of a high level of  
111 adherence by interprofessional teams to best-practice guidelines, in order to ensure  
112 their efficacy (7, 10). Adherence to best-practice guidelines is defined as the  
113 achievement of the guideline, as well as the associated interventions performed by  
114 clinicians (11). In surgical settings (e.g., neurosurgery, orthopedic surgery) international  
115 research teams (12-15) have developed composite scores to examine the level of  
116 adherence to best-practice guidelines by interprofessional teams. Their findings  
117 suggested that a higher level of adherence is associated with a higher quality of care  
118 given to patients and families.

119 In postoperative cardiac surgery settings, recent studies (5, 16) identified a  
120 significant association between a high level of adherence to best-practice guidelines by  
121 interprofessional teams and a lower risk of postoperative complications and adverse  
122 events for patients. Other studies (5, 16, 17) have shown a significant association  
123 between a lower level of adherence to best-practice guidelines by interprofessional  
124 teams and a higher risk of postoperative complications and adverse events for patients.  
125 Larrazzet et al. (2014) conducted a longitudinal study of 144 patients who died after  
126 cardiac surgery. The authors identified a significant association between a lack of  
127 adherence to best-practice guidelines by interprofessional teams, and a higher risk of  
128 mortality, highlighting the importance of the high adherence to best-practice guidelines  
129 by interprofessional teams (17).

130 Internationally, there is variability in the scope of practice and level of autonomy  
131 of ACNPs (18,19). Recent studies have examined the practice of nurse practitioners  
132 (NP) within primary and acute care settings, and suggested that their practice could  
133 increase the level of adherence to best-practice guidelines by interprofessional teams  
134 (18, 19). The NP's support of the practice of different care providers in the team with a  
135 focus on best evidence is believed to underpin providers' adherence to best-practice  
136 guidelines focused on pharmacotherapy, clinical indicators, and lifestyle promotion. NPs  
137 also enhance collaboration and communication among teams' members and facilitate  
138 continuity of care, contributing to the higher adherence to best-practice guidelines by  
139 interprofessional teams (18, 20).

140 Based on the International Council of Nurses guidelines, the NP is an advanced  
141 practice nursing role, based on a graduate or postgraduate education and an in-depth  
142 nursing and medical expertise (21-23). In several acute care settings, including  
143 postoperative cardiac surgery, acute care nurse practitioners (ACNP) have been  
144 implemented in interprofessional teams and performed activities such as the clinical and  
145 psychosocial assessment of patients, the prescription and management of  
146 pharmacotherapy, laboratory tests and clinical interventions, lifestyle promotion,  
147 teaching of coping strategies, preparation for hospital discharge, and the management  
148 of consultations and external resources (24). International research teams (23, 25) have  
149 examined the practice of ACNPs within postoperative cardiac surgery settings. They  
150 identified significant associations between the ACNPs' practice and higher patient  
151 satisfaction, higher participation of patients to cardiac rehabilitation, and lower length of  
152 stay at the hospital after the cardiac surgery. However, other research teams (21, 26)

153 did not identify significant associations between ACNP practice and patient and  
154 organizational outcomes within postoperative cardiac surgery settings. More  
155 specifically, the authors suggested that the difficulty of recruiting participants, the high  
156 attrition rate, the small sample sizes, and the inability to adjust the data analysis for  
157 confounding variables related to the patient and interprofessional teams' characteristics  
158 were important limits contributing to the non-significant findings (21,26).

159         Systematic reviews of randomized controlled trials (RCT) (21, 23) have been  
160 conducted to understand the inconsistent findings in the current literature. These  
161 systematic reviews have identified three important limits contributing to the inconsistent  
162 findings of the current literature. Firstly, although several RCT of the current literature  
163 focus on the efficacy of ACNP for patients and healthcare organizations, less attention  
164 has been paid to the efficacy of these providers for interprofessional teams. The  
165 qualitative study of Reich et al. (2018) suggested that the implementation of ACNP  
166 within interprofessional teams increases the level of adherence of those teams to best-  
167 practice guidelines in postoperative cardiac surgery settings, and represents an  
168 underlying factor contributing to the efficacy of NP (19). However, these propositions  
169 have not been subjected to statistical validation, thus it is unknown if interprofessional  
170 teams with ACNP are associated with higher levels of adherence to best-practice  
171 guidelines, compared to interprofessional teams without ACNP. Moreover, until today,  
172 no validated extraction tool is available to measure the level of adherence to best-  
173 practice guidelines of interprofessional teams with and without ACNP in postoperative  
174 cardiac surgery settings.

175           Secondly, systematic reviews have highlighted the difficulty in adequacy  
176 controlling confounding variables in the existing RCT (21, 23). Confounding variables  
177 represent important factors influencing the efficacy of ACNP on patient and  
178 organizational outcomes in postoperative cardiac surgery settings. Methodological limits  
179 of the existing RCT, such as the small sample size and high attrition rate, limit the  
180 capacity of research teams to develop robust multivariate statistical models adjusted for  
181 confounding variables related to patient, interprofessional teams, and organizational  
182 characteristics (21, 23). Interestingly, retrospective observational studies have shown to  
183 be a relevant alternative to examine the association between ACNP and patient and  
184 organizational outcomes in postoperative cardiac surgery settings. Existing studies (27-  
185 30) have used retrospective observational studies to gather a large cohort of patients,  
186 limit attrition, and develop statistical models adjusted for many confounding variables.  
187 These studies (6, 27-29) have identified significant associations between ACNP within  
188 interprofessional teams, and lower risks of mortality and decreased costs in  
189 postoperative cardiac surgery settings.

190           Thirdly, the majority of the RCT focus on ACNP practice within primary care  
191 settings (e.g., in-home care, rehabilitation clinic) after the cardiac surgery. Less  
192 attention has been paid to ACNP practice in acute care settings; however, within these  
193 settings, ACNP works in collaboration with cardiac surgeons, nursing teams,  
194 rehabilitation teams, social workers, and other members of the interprofessional teams  
195 to ensure the patient optimal recovery after the surgery and prevents the risk of adverse  
196 events and postoperative complications. Moreover, for patients and families, the acute  
197 care hospitalization after the surgery represents a crucial phase of their postoperative

198 recovery and is associated with several physical, psychosocial, and emotional stressors  
199 (30). Future studies are needed to substantiate the contribution of ACNP in  
200 interprofessional teams within acute care settings, and identify the benefits of their  
201 practice for patients, families, interprofessional teams, and healthcare organizations.

202         Consequently, the aim of this project is to examine the level of adherence to  
203 best-practice guidelines of interprofessional teams with and without ACNP in acute  
204 postoperative cardiac surgery settings in Québec, Canada.

### 205 **Study hypothesis and objectives**

206 The hypothesis of this study is:

207         H1: This study will verify if interprofessional teams with ACNP are associated  
208 with a higher level of adherence to best-practice guidelines compared to  
209 interprofessional teams without ACNP, after controlling for the patient and  
210 interprofessional team characteristics.

211 The objectives of this study are as follows:

- 212         1. Develop and pilot-test an extraction tool to measure the level of adherence to  
213             best-practice guidelines of interprofessional teams within postoperative cardiac  
214             surgery setting.
- 215         2. Describe the patient and interprofessional teams' characteristics, as well as the  
216             level of adherence to best-practice guidelines, of patients under the care of  
217             interprofessional teams with and without ACNP.
- 218         3. Examine the association between interprofessional teams with ACNP and the  
219             level of adherence to best-practice guidelines, compared to interprofessional



220 teams without ACNP, after adjusting patient and interprofessional team  
221 characteristics in postoperative cardiac surgery setting.

## 222 **Methods and design**

### 223 **Study design**

224 A retrospective observational study (31, 32) will be conducted. De-identified data will be  
225 extracted from the UHC data **warehouse**, and the patient health records to assemble  
226 the retrospective cohort of patients and conduct the data collection. Ethics approval was  
227 obtained from the McGill University Health Centre Research Ethics Board on  
228 September 15, 2021 (IPSSA chirurgie cardiaque/2022-8094). This project uses the  
229 guidelines from *Strengthening the Reporting of Observational Studies in Epidemiology*  
230 *(STROBE) Statement: Guidelines for Reporting Observational Studies* (32) were used  
231 for this project (SA appendix).

### 232 **Study setting**

233 This study will be conducted at a University healthcare centre (UHC) in Québec,  
234 Canada. Annually, this healthcare centre performs approximately 1,000 cardiac  
235 surgeries and has a 36-bed postoperative cardiac surgery unit.

236 After cardiac surgery, patients are admitted to the intensive care unit (ICU), and  
237 are under the care of ICU teams. At the time of data collection, the ICU teams in  
238 Québec, Canada do not include ACNP. On average, patients are hospitalized for 24  
239 hours in the ICU before being transferred to the postoperative cardiac surgery unit.  
240 Patients readmitted to the ICU are under the care of ICU teams.

241 Upon admission to the postoperative cardiac surgery unit, patients are assigned  
242 to the care of interprofessional teams with or without ACNP. Team assignment depends

243 on the current workload of each team, and the availability of the beds in the unit.  
244 Interprofessional teams with ACNPs are assigned 16 of the unit's beds (44%) and  
245 interprofessional teams without ACNP are assigned 20 of the unit's beds (56%).  
246 Patients are followed by their respective teams from their admission to the cardiac  
247 surgery unit, until the hospital discharge or death. On average, the length of stay at the  
248 hospital after the surgery ranges from 9 to 11 days (33).

249 Interprofessional teams with and without ACNP include the following: cardiac  
250 surgeons and residents nursing teams, skin care and wound therapists,  
251 physiotherapists, nutritionists, respiratory therapists, social workers, and medical and  
252 other specialists. Interprofessional teams with and without ACNP ensure the daily  
253 follow-up of patients, the assessment of the patient's clinical and psychosocial condition,  
254 the management of pharmacotherapy, clinical intervention, laboratory tests, lifestyle  
255 promotion, and the preparation of patients upon hospital discharge.

### 256 **The practice of acute care nurse practitioners in postoperative cardiac surgery** 257 **unit**

258 Since 2017, seven ACNPs practice in postoperative cardiac surgery, based on a  
259 monthly rotation system. Two ACNP simultaneously practice within interprofessional  
260 teams and collaborate with other clinicians to ensure the daily follow-up of the patients  
261 after cardiac surgery. ACNP practice includes the assessment of the clinical and  
262 psychosocial condition of the patient and families, the management of the  
263 pharmacotherapy, clinical interventions, and laboratory tests. The ACNP also teaches  
264 coping strategies, lifestyle promotion, cardiac rehabilitation, preparation of the patients  
265 and families for the in-home recovery after discharge. The ACNP supports the

266 preparation for hospital discharge (e.g., prescription of the patient medication after  
267 discharge, summary for the family physician, etc.) (34).

### 268 **Study population and sample**

269 A dynamic cohort of patients will be assembled from hospitalized patients at the  
270 postoperative cardiac surgery unit between January 1, 2019, and January 31, 2020.

271 This timeframe will avoid the recruitment of patients during the COVID-19 pandemic, a  
272 window of time during which the practice of ACNP within the unit was inconsistent.

273 Patients will be selected, based on three inclusion criteria: 1) patient admitted for a  
274 diagnosis of CABG and/or valve repair, 2) patient age is over 18 years old, and 3)  
275 patient has been hospitalized for at least 24 hours in the postoperative cardiac surgery  
276 unit. The minimum 24-hour criteria will allow our team to examine the hospitalization of  
277 the patient in the postoperative cardiac surgery unit, which is the setting where ACNPs  
278 practice in Québec (35). Patients will be identified from the electronic databases of the  
279 UHC and the diagnostic codes of the Canadian Institute for Health Information (36) (SB  
280 appendix).

281 A sample size calculation was conducted in G\*power (37). This project will  
282 include 15 variables, including one independent variable, one dependent variable, and  
283 13 confounding variables. The variables selected for this project are described in the  
284 next section. To perform one multivariate linear regression model and detect an effect  
285 size of  $f^2=0.15$  with a power of 0.80 and a standard error of 5%, a minimum sample size  
286 of 183 patients was estimated.

287 A total of 300 patients will be selected, based on the sample size calculation and  
288 an over-estimation of at least 20%, to consider the risk of error from the presence of

289 missing data and incomplete patient health records (38, 39). A systematic random  
290 selection of 150 patients under the care of interprofessional teams with ACNP will be  
291 conducted and matched with 150 patients under the care of interprofessional teams  
292 without ACNP. Three criteria (40-43) will be used to match each pair (1:1): 1) age (i.e., a  
293 five-year gap will be tolerated) 2) sex, and 3) type of cardiac surgery (i.e., CABG, valve  
294 repair, or CABG/valve repair).

295 Patients will be followed from their admission to the ICU after the cardiac  
296 surgery, until the occurrence of the following events, whichever occurs first: 1)  
297 discharge from the hospital, 2) death, or 3) the cumulation of 14-days in hospital after  
298 the surgery. The 14-days' timeframe will allow our team to capture the acute phase of  
299 the patient hospitalization after the cardiac surgery (33). The total length of stay for  
300 patients hospitalized longer than 14-days will be measured.

### 301 **Variables under study**

302 A systematic review of RCTs (24) and an extensive search in the literature and  
303 international healthcare organizations (e.g., American Heart Association, Society of  
304 Thoracic Surgeons) was conducted to retrieve best-practice guidelines for  
305 interprofessional teams in postoperative cardiac surgery settings, and confounding  
306 variables related to patient and interprofessional teams' characteristics. A total of 12  
307 best-practice guidelines and 13 confounding variables were identified and presented in  
308 Figure 1. The operationalization of each variable is presented in SC appendix.

309 *Independent variable: interprofessional teams with and without acute care nurse*  
310 *practitioner*

311 A dichotomous variable will be created to measure the inclusion of at least one ACNP  
312 within the interprofessional team. For patients under the care of an interprofessional  
313 team with ACNP, an additional descriptive variable will measure the number of days  
314 where the ACNP was implicated in the daily follow-up of the patient, on the entire  
315 hospitalization at the postoperative cardiac surgery unit.

316 *Dependant variable: the level of adherence to best-practice guidelines by*  
317 *interprofessional teams*

318 A composite score will be developed to measure the level of adherence to best-practice  
319 guidelines by interprofessional teams. An individual composite score will be calculated  
320 per patient per day of hospitalization at the postoperative cardiac surgery unit. A total of  
321 12 best-practice guidelines will be included in the composite score (Figure 1). Each  
322 best-practice guideline will be scored on two points based on the following: 1) the  
323 achievement of the guideline recommendation (e.g., prescription of beta blocker) and 2)  
324 the associated interventions performed by clinicians (e.g., follow-up of the blood  
325 pressure). All best-practice guidelines are divided into three categories: 1)  
326 pharmacotherapy (n=4), 2) laboratory tests (n=4), and 3) postoperative assessment  
327 (n=4).

328 Four best-practice guidelines are included in the category of pharmacotherapy.  
329 These guidelines are the prescription and monitoring of medications including: 1)  
330 anticoagulants, 2) beta blockers, 3) lipid-lowering agents, and 4) anti-platelets, during  
331 hospitalization and at hospital discharge of the patient. For each best-practice guideline,  
332 two additional descriptive variables will be collected, including the type of medication

333 prescribed and the presence of a contraindication, which precludes the possibility of  
334 achieving the guideline recommendation (e.g., allergy).

335 Four best-practice guidelines on laboratory tests are included, recommending the  
336 prescription and monitoring of the following: 1) potassium (K+), 2) magnesium (Mg+), 3)  
337 serum glucose, and 4) international normalized ratio (INR) by interprofessional teams  
338 during the patient's hospitalization in the postoperative cardiac surgery unit. The  
339 achievement of each best-practice guideline recommendation will be confirmed if the  
340 laboratory result falls under the normal range supported by the current literature. An  
341 additional variable called "no INR needed" will be added specifically for the best-practice  
342 guideline related to the prescription and management of INR, to take into consideration  
343 patient who don't need a strict INR follow-up (e.g., administration of direct acting oral  
344 anticoagulant (DAOC)). A pilot test will be performed to assess the characteristics of the  
345 patients hospitalized at the post-operative cardiac surgery unit and the feasibility of the  
346 data collection. The following three additional descriptive variables will be measured for  
347 each guideline: 1) number of prescriptions requested by interprofessional teams, 2)  
348 proportion of abnormal values below or above normal range, and 3) average of all  
349 values of laboratory tests.

350 Four best-practice guidelines are included in the category of the postoperative  
351 assessment performed by interprofessional teams. A daily assessment of the patient's  
352 level of pain, surgical wound(s), nutrition, and mobilization will be measured. For each  
353 best-practice guideline recommendation, the achievement of the guideline will be  
354 confirmed if at least one postoperative assessment per day is performed by the ACNP  
355 or other members of the interprofessional teams during the patient's hospitalization in

356 the postoperative cardiac surgery unit. Two additional descriptive variables will be  
357 measured for each best-practice guideline, including: 1) the total number of  
358 postoperative assessments performed by interprofessional teams during the  
359 hospitalization, and 2) the type of associated interventions conducted by clinicians (e.g.,  
360 non-pharmacological, consultation, etc.).

361 *Confounding variables related to patient characteristics*

362 Eleven confounding variables related to patient characteristics will be measured. For  
363 each patient, sociodemographic characteristics (e.g., sex, age) will be measured. The  
364 total length of stay at the hospital will be measured, which includes the stay in the ICU  
365 and postoperative cardiac surgery unit. The type of cardiac surgery will be collected  
366 from a categorical variable with three categories: 1) CABG, 2) valve repair, and 3)  
367 CABG/valve repairs. Comorbidities will be measured and operationalized from the  
368 Charlson Comorbidity Index (CCI) (44, 45). A total score of 24 points will be calculated  
369 for each patient based on the 17 clinical conditions included in the CCI (SD appendix).  
370 The length of stay in the postoperative cardiac surgery unit will be collected for each  
371 patient. The hospital 30-days readmission at the postoperative cardiac surgery unit after  
372 discharge will be measured for each patient from a dichotomous variable.

373 Four confounding variables related to the patient characteristics in the ICU  
374 setting will be measured. The total number of hours hospitalized in the ICU will be  
375 measured from the time (in hours) of admission to the ICU after the surgery and the  
376 time (in hours) of discharge of the patient. The postoperative prolonged mechanical  
377 ventilation will be measured from a dichotomous variable. A prolonged mechanical  
378 ventilation will be confirmed if the time under mechanical ventilation exceeds 24 hours.

379 The failed extubation of the patient and reintubation after first extubation will be  
380 measured with a dichotomous variable. The number of episodes of ICU readmission  
381 after initial discharge will be measured for each patient.

### 382 *Confounding variables related to interprofessional teams' characteristics*

383 Two confounding variables related to interprofessional teams' characteristics will be  
384 measured. First, the cardiac surgeon who performed the surgery and ensured the  
385 follow-up of the patient's recovery will be noted. A confidential code will be created for  
386 each surgeon practising in the UHC. Second, a discrete variable will be created to  
387 measure the number of consultations conducted by clinicians from different expertises  
388 (e.g., nutrition, rehabilitation team) during the patient's hospitalization in the  
389 postoperative cardiac surgery unit. A categorical descriptive variable will be created to  
390 measure each clinician's expertise, including the following: 1) rehabilitation team (e.g.,  
391 physical therapist, occupational therapist), 2) respiratory therapist, 3) social worker, 4)  
392 skin and wound care therapist, 5) nutritionist, and 6) speciality consultation (e.g.,  
393 internal medicine, nephrology).

### 394 **Data collection**

395 An extraction tool will be developed and pilot-tested, based on the best-practice  
396 guidelines and the confounding variables related to the patient and interprofessional  
397 team characteristics (Figure 1). One extraction will be completed per patient per day  
398 during the hospitalization in the postoperative cardiac surgery unit, by the first author or  
399 a research assistant. The development of the extraction tool followed the Consensus-  
400 based Standards for the selection of health measurement instrument (COSMIN)



401 guidelines (46) and will include three stages: the content validation; the criteria  
402 validation; and the pilot-test.

403 *Data collection for the content validation*

404 Content validation will be performed following two steps (46). First, an expert committee  
405 will be recruited from clinicians, managers, and researchers who have expertise in  
406 postoperative cardiac surgery. The identification and recruitment of experts will be  
407 conducted by our research team and will include experts in Canada. A total of 10  
408 experts will be recruited, including at least the following five: 1) an ACNP who worked a  
409 minimum of one year within a postoperative cardiac surgery unit outside of our  
410 associated UHC, 2) a cardiac surgeon or fellow in cardiac surgery who worked at least  
411 two years in an acute care centre outside of our associated UHC, 3) a nurse manager  
412 who manages, at least one year, a postoperative cardiac surgery unit, within our  
413 associated UHC, 4) a healthcare professional who worked in the data warehouse of our  
414 associated UHC for at least one year, and 5) a researcher in nursing or healthcare  
415 sciences with an expertise in measurement instruments and/or cardiac surgery.

416         Second, an electronic survey (47) will be created and composed of all items of  
417 the extraction tool (best-practice guidelines and confounding variables). For each item,  
418 experts will assess its relevance using a 5-points Likert scale (48, 49). Additional  
419 spaces for qualitative comments and suggestions will be included in the survey. Two  
420 rounds of revision are planned. After the first round, our team will update the extraction  
421 tool and revise any unclear items based on the experts' recommendations, and an  
422 updated version will be resubmitted to the expert committee.

423 *Data collection for the criterion validation*

424 The criterion validation of the extraction tool will follow three consecutive steps. Firstly,  
425 the best-practice guidelines of The Society of Thoracic Surgeons (STS) have been  
426 selected as the gold standard of comparison for this study. For many years, the STS  
427 has been a leading healthcare organization in the development and validation of best-  
428 practice guidelines and performance measures in the care of patients in cardiac surgery  
429 settings (10). In 2007, the STS developed and validated 21 performance measures for  
430 the delivery of high quality of care for patients who underwent CABG, valve repair, and  
431 CABG/valve repairs (50, 51). For this project, five performance measures were  
432 selected, including: 1) prolonged mechanical ventilation higher than 24 hours in the ICU;  
433 2) a 30-day readmission rate at the postoperative cardiac surgery unit after hospital  
434 discharge; and prescription of the 3) anti-platelet, 4) beta blocker, 5) and lipid-lowering  
435 agent, during the hospitalization at the postoperative cardiac surgery unit and at  
436 discharge. Each performance measure is operationalized as the proportion of patients  
437 who achieved the outcome (e.g., proportion of patients who were under prolonged  
438 mechanical ventilation) over the total sample size (46, 47).

439 Secondly, 30 patient health records will be reviewed independently by two  
440 reviewers on two occasions, including the first author and a research assistant. For the  
441 first round of revision, the patient's health record will be reviewed with the extraction  
442 tool. For the second round of revision, the records will be reviewed with the five  
443 performance measures from the STS.

#### 444 *Data collection for the pilot-test*

445 A pilot-test will be conducted to assess the feasibility of the tool, standardize data  
446 collection among reviewers, examine the quality and accessibility of the retrospective

447 data, and update the tool if needed. Four iterative steps will be included in the pilot-test  
448 (52-55). First, two reviewers will conduct the pilot-test and data collection. Training  
449 sessions and documentation will be given to the reviewers.

450 Secondly, 30 patient health records from hospitalized patients in the  
451 postoperative cardiac surgery unit between January 1, 2019, and January 31, 2020, will  
452 be randomly selected. These patients will not be included in the retrospective cohort.  
453 Data will be collected by the two reviewers with the extraction tool. Inter-rater reliability  
454 will be assessed and a Cohen kappa higher than 0.60 will be targeted (55).

455 Thirdly, a triangulation of the available data will be performed to assess the  
456 quality and accessibility of the data. Multiple data sources will be screened between the  
457 electronic databases and patient health records. Items from the extraction tool with a  
458 high quantity of missing data or low quality of available data will be modified or  
459 removed.

460 Finally, frequent meetings among all research team members will be conducted  
461 to discuss divergences, reinforce convergences, and establish a consensus. The  
462 extraction tool will be updated after the pilot-test if needed (52).

463 During data collection from the retrospective cohort of patients, an additional 30  
464 patient health records will be reviewed by two independent reviewers to ensure the  
465 standardization of the data collection (49, 50). Inter-rater reliability will be assessed and  
466 a Cohen Kappa value higher than 0.60 will be targeted (55).

467 **Data analysis**

468 Statistical analysis will be conducted to meet objectives one, two and three. The unit of  
469 observation will be the patient-level and the unit of analysis will be the interprofessional  
470 team-level.

471 *Objective 1*

472 The content validation of the extraction tool will include two rounds of revisions, with  
473 additional rounds if needed (56, 57). For each round of revision, a Fleiss Kappa will be  
474 calculated and a value between 0.60 and 0.80 will be targeted (48, 49). The content  
475 validity index (CVI) of each individual item of the extraction tool will be calculated from  
476 the proportion of experts who rated a score of 4 or 5 on the Likert scale (58). A CVI of  
477 0.80 will be targeted for each item and items with a value below 0.80 will be removed or  
478 modified. Then, the proportion of items with a CVI value above 0.80 will be calculated to  
479 determine the overall CVI of the extraction tool. A value higher than 0.80 for the overall  
480 CVI of the extraction tool will be targeted (46). Qualitative comments and  
481 recommendations by experts will be analyzed by content analysis (59).

482 The criteria validation will be assessed using 30 patient health records. Five  
483 performance measures developed by the STS will serve as the gold standard for the  
484 comparison (10). First, the proportion of patients who achieved each performance  
485 measure over the total sample size (n=30) will be calculated, from the measures  
486 collected with the gold standard, as well as the measures collected with the extraction  
487 tool. Second, Spearman correlation will be calculated to assess the correlation between  
488 the proportions obtained from the measures of the gold standard, and the proportions  
489 obtained from the measures of the extraction tool. Values of Spearman correlation  
490 higher than 0.70 will be targeted (48, 49).

491 *Objective 2*

492 Descriptive analysis will be performed to assess the level of adherence by  
493 interprofessional teams with and without ACNP, as well as the confounding variables for  
494 patients under the care of both teams (60). An analysis of missing data will be  
495 conducted to examine the quality and distribution of missing data within patient health  
496 records and electronic databases. Team meetings and consultations with clinicians and  
497 statisticians will be held to discuss and identify potential causes of missing data, as well  
498 as to conduct a statistical analysis to manage them (61).

499 A composite score will be developed to measure the level of adherence to best-  
500 practice guidelines by interprofessional teams with and without ACNP. A composite  
501 score per patient per day of hospitalization in postoperative cardiac surgery will be  
502 developed and based on four consecutive steps. Firstly, for each best-practice  
503 guideline, a score on a scale of two will be created and points will be attributed for: 1)  
504 the achievement of the best-practice guideline recommendation, and 2) the associated  
505 intervention performed by clinicians. Points will be given based on the information  
506 contained in the patient health record and electronic databases. A missed intervention  
507 will be considered as a lack of adherence to best-practice guidelines, and no point will  
508 be given.

509 Secondly, all best-practice guidelines are divided into three categories: 1)  
510 pharmacotherapy, 2) laboratory tests, and 3) postoperative assessments. The sum of  
511 the individual score of each best-practice guideline will be calculated for each category.  
512 More specifically, each category includes four best-practice guidelines, and will be  
513 based on a total score ranging from zero to eight.

514 Thirdly, an overall composite score will be calculated from the sum of all the  
515 scores of the three categories, ranging from zero to 24. The overall composite score will  
516 be transformed into a value in percentage (0 to 100%) and an increase of the score will  
517 be associated with an increase of the level of adherence to best-practice guidelines by  
518 interprofessional teams. An overall score will be calculated per patient per each day  
519 hospitalized in the postoperative cardiac surgery unit.

520 Finally, an average composite score will be calculated from the average of all  
521 overall scores during the patient's hospitalization at the postoperative cardiac surgery  
522 unit. An average composite score will be calculated for all patients included in the  
523 retrospective cohort. A graphic illustration will be created from all average scores to  
524 visualize the tendency and distribution of the scores of the cohort.

### 525 *Objective 3*

526 Bivariate analysis will be conducted, and the statistical significance will be based on a  $p$ -  
527 value of 0.05 (60). The Bonferroni correction will be applied for the examination of each  
528 confounding variable related to the patient and interprofessional teams' characteristics  
529 (62).

530 A multivariate linear regression model will be developed to examine the  
531 association between interprofessional teams with and without ACNP and the level of  
532 adherence to best-practice guidelines (63-65). An examination of the distribution of the  
533 data will be performed. In the case of an abnormal distribution of the data, a  
534 transformation will be conducted to adjust the statistical model based on the observed  
535 data. The independent variables will include the interprofessional teams with and  
536 without ACNP, as well confounding variables. A correlation matrix will be developed,

537 and tolerance value lower than 0.2 and a variance inflation factor (VIF) value higher  
538 than 5 will be used to identify multicollinearity between independent variables (63-65).  
539 Independent variables with multicollinearity will be removed one at the time and a new  
540 regression will be calculated. The dependent variable of the regression model will be  
541 the average composite score (%) of the level of adherence to best-practice guidelines.  
542 Statistical significance will be based on a *p*-value of 0.05. Sensitivity analysis will be  
543 conducted based on a selection of confounding variables related to the characteristics  
544 of the patient (e.g., length of stay, ICU readmission). The selection of these confounding  
545 variables will be based on the observed data and descriptive analysis. The residual  
546 analysis and the analysis of the  $R^2$  will be conducted to assess the goodness-of-fit of  
547 the multivariate linear regression model.

#### 548 **Interpretation of the findings**

549 Consultations with clinicians and managers practising in postoperative cardiac surgery  
550 settings in Québec and Canada will be conducted to gain an in-depth understanding of  
551 the findings. These consultations will allow our team to explore potential underlying  
552 factors and mechanisms which could influence the level of adherence to best-practice  
553 guidelines by interprofessional teams with and without ACNP. Field notes will be taken  
554 during these consultations and analyzed using content analysis (45).

#### 555 **Ethical considerations**

556 Ethics approval was obtained prior to the beginning of the study. No identifying  
557 information will be collected during the content validation with the expert committee and  
558 the data collection within electronic databases and patient health records. A confidential  
559 pairing system will be created to match the patient identification with a random number

560 (66). The database of the project will be kept in a secure server, protected by a  
561 confidential numeric code known only by the research team. During the dissemination of  
562 the findings, data will be shared in an aggregated form and the identity of the UHC, as  
563 well as the identity of the patients and clinicians, will remain confidential.

## 564 **Discussion**

565 ACNPs hold an important place within interprofessional teams caring for patients and  
566 families following cardiac surgery. For patients and families, ACNPs contribute to the  
567 management of pharmacotherapy, clinical and psychosocial conditions, as well as  
568 lifestyle promotion and teaching of coping strategies. For interprofessional teams,  
569 ACNPs enhance the collaboration and communication among team members and  
570 reinforce continuity of care. Until now studies examined the efficacy of ACNP on patient  
571 and organization outcomes within postoperative cardiac surgery settings; however, less  
572 attention has been paid to underlying factors contributing to the effect of ACNPs on  
573 these outcomes.

574         The findings of this study will further our understanding of the contributions of  
575 ACNPs in interprofessional teams practising in postoperative cardiac surgery settings in  
576 Québec, Canada and internationally. This project will generate empirical data to  
577 support and document the practice of ACNPs within interprofessional teams in four  
578 important ways. Firstly, as part of this project, a systematic review of randomized  
579 controlled trials was published to retrieve the current literature on the efficacy of ACNP  
580 and advanced practice nursing roles in postoperative cardiac surgery settings, and to  
581 examine their adherence to best-practice guidelines (40). Secondly, an extraction tool  
582 focusing on the level of adherence to best-practice guidelines by interprofessional



583 teams in postoperative cardiac surgery will be available for the field of cardiac surgery  
584 research and the scientific community more broadly. Thirdly, for patients under the care  
585 of interprofessional teams with and without ACNP, the findings will provide a description  
586 of the patient and interprofessional team characteristics as well as the adherence to  
587 best-practice guidelines. Finally, this study will examine the effect of ACNPs on the  
588 adherence to best-practice guidelines in settings where ACNPs are incorporated within  
589 inter-professional teams, and provide empirical data for those settings looking to  
590 introduce such roles in a postoperative cardiac surgery setting.

### 591 **Funding**

592 This project is funded by the Réseau de recherche en intervention en sciences  
593 infirmières du Québec (RRISIQ). Li-Anne Audet holds doctoral scholarships from the  
594 Fonds de recherche du Québec – santé as well as from the Québec Ministry of  
595 Education (Ministère de l'Éducation et de l'Enseignement Supérieur du Québec).  
596 Éric Tchouaket holds a career award from the Fonds de recherche du Québec – Santé  
597 (Junior 2 Research Salary Award). Kelley Kilpatrick holds a career award from the  
598 Fonds de recherche du Québec – Santé (Senior Research Salary Award) and holder of  
599 the Susan E. French Chair in Nursing Research and Innovative Practice. No funding  
600 sources were involved in the study conception and design, data collection, analysis,  
601 interpretation, or in the final decision to submit this manuscript for publication.

### 602 **Competing interest**

603 None to declare.

### 604 **Acknowledgments**

605 The authors would like to acknowledge the comments received from Christine Maheu,  
606 Andraea Van Hulst, and Alain Biron.

### 607 **Author Contributions**

608 Conceptualization: Li-Anne Audet, Mélanie Lavoie-Tremblay, Éric Tchouaket, Kelley  
609 Kilpatrick

610 Methodology: Li-Anne Audet, Mélanie Lavoie-Tremblay, Éric Tchouaket, Kelley  
611 Kilpatrick

612 Supervision: Mélanie Lavoie-Tremblay, Éric Tchouaket, Kelley Kilpatrick

613 Writing – original draft: Li-Anne Audet

614 Writing – review & editing: Mélanie Lavoie-Tremblay, Éric Tchouaket, Kelley Kilpatrick

### 615 **References**

- 616 1. Caplan LR. Primer on cerebrovascular diseases. London, United Kingdom:  
617 Academic Press is an imprint of Elsevier; 2017.  
618
- 619 2. Bowdish ME, D'Agostino RS, Thourani VH, Desai N, Shahian DM, Fernandez  
620 FG, et al. The Society of Thoracic Surgeons Adult Cardiac Surgery Database: 2020  
621 Update on Outcomes and Research. *The Annals of thoracic surgery*. 2020;109(6):1646-  
622 55.  
623
- 624 3. Philippon F, Racine N, Labrecque N, Paradis M-J. Réseau québécois de  
625 cardiologie tertiaire. Rapport d'activité 2010-2013. Québec, QC; 2013.  
626
- 627 4. Canadian Institute of Health Information. Cardiac Care Quality Indicators Report.  
628 Ottawa, ON: Canadian Institute for Health Information  
629 ; 2017.  
630
- 631 5. Bourgon Labelle J, Audet L, Farand P, Rochefort C. Are hospital nurse staffing  
632 practices associated with postoperative cardiac events and death? A systematic review.  
633 *PLOS ONE* [Internet]. 2019; 14(10).  
634
- 635 6. Lane-Fall MB, Ramaswamy TS, Brown SES, He X, Gutsche JT, Fleisher LA, et  
636 al. Structural, Nursing, and Physician Characteristics and 30-Day Mortality for Patients  
637 Undergoing Cardiac Surgery in Pennsylvania. *Critical care medicine*. 2017;45(9):1472-  
638 80.  
639

- 640 7. Benjamin JE, Virani SS, Callaway WC, Chamberlain MA, Chang RA, Cheng ES,  
641 et al. Heart Disease and Stroke Statistics—2018 Update: A Report From the American  
642 Heart Association. *Circulation*. 2019;137(12):e67-e492.  
643
- 644 8. Goldfarb M, Bendayan M, Rudski LG, Morin JF, Langlois Y, Ma F, et al. Cost of  
645 Cardiac Surgery in Frail Compared With Nonfrail Older Adults. *The Canadian journal of*  
646 *cardiology*. 2017;33(8):1020-6.  
647
- 648 9. McConnell G, Woltz P, Bradford WT, Ledford JE, Williams JB. Enhanced  
649 recovery after cardiac surgery program to improve patient outcomes. *Nursing*.  
650 2018;48(11):24-31.  
651
- 652 10. The Society of Thoracic Surgeons. Performance Measures 2019  
653 [internet], Chicago (USA):The Society of Thoracic Surgeons; 2019 [updated 2019; cited  
654 2021 Aug 24]. Available from: [https://www.sts.org/quality-safety/performance-](https://www.sts.org/quality-safety/performance-measures)  
655 [measures](https://www.sts.org/quality-safety/performance-measures)].  
656
- 657 11. Khalil V, Danninger M, Wang W, Khalil H. An audit of adherence to heart failure  
658 guidelines in an Australian hospital: A pharmacist perspective. *Journal of Evaluation in*  
659 *Clinical Practice*. 2017;23(6):1195-202.  
660
- 661 12. Burnier M, Egan BM. Adherence in Hypertension: A Review of Prevalence, Risk  
662 Factors, Impact, and Management. *Circulation Research*. 2019;124(7):1124-40.  
663
- 664 13. Chan W, Chen A, Tiao D, Selinger C, Leong R. Medication adherence in  
665 inflammatory bowel disease. *Intestinal Research [Internet]*. 2017; 15(4):434-45.  
666
- 667 14. López-Campos JL, Quintana Gallego E, Carrasco Hernández L. Status of and  
668 strategies for improving adherence to COPD treatment. *International Journal of COPD*  
669 [Internet]. 2019; 14:1503-15.  
670
- 671 15. Moon SJ, Lee WY, Hwang JS, Hong YP, Morisky DE. Accuracy of a screening  
672 tool for medication adherence: A systematic review and meta-analysis of the Morisky  
673 Medication Adherence Scale-8. *PloS one*. 2017;12(11):e0187139.  
674
- 675 16. Witwer M, Dobbins G, Uher C, McFarren M. Auditing CAUTI Best Practices  
676 Bundle Adherence in a 24-bed Neurovascular/Cardiovascular/Intensive Care Unit. *AJIC:*  
677 *American Journal of Infection Control*. 2019;47(6 Supplement):S30.  
678
- 679 17. Larrazet F, Folliguet T, Laborde F, Bachet J, Hervé C. Mortality meetings: ethical  
680 considerations and adherence to evidence-based practice from 6 years of experience in  
681 a mixed cardiac department. *European journal of cardio-thoracic surgery : official*  
682 *journal of the European Association for Cardio-thoracic Surgery*. 2011;40(5):1039-45.  
683

- 684 18. Norful AA, Ye S, Van der-Biezen M, Poghosyan L. Nurse Practitioner-Physician  
685 Comanagement of Patients in Primary Care. Policy, politics & nursing practice.  
686 2018;1527154418815024.  
687
- 688 19. Reich E, Then K, Rankin J. Barriers to Clinical Practice Guideline Implementation  
689 for Septic Patients in the Emergency Department. Journal of Emergency Nursing.  
690 2018;44(6):552-62.  
691
- 692 20. Kleinpell. Outcome assessment in advanced practice nursing. New York, NY:  
693 Springer Publishing Company, LLC; 2017.  
694
- 695 21. Smigorowsky MJ, Sebastianski M, Sean McMurtry M, Tsuyuki RT, Norris CM.  
696 Outcomes of nurse practitioner-led care in patients with cardiovascular disease: A  
697 systematic review and meta-analysis. Journal of advanced nursing. 2020;76(1):81-95.  
698
- 699 22. Yang BK, Johantgen ME, Trinkoff AM, Idzik SR, Wince J, Tomlinson C. State  
700 Nurse Practitioner Practice Regulations and U.S. Health Care Delivery Outcomes: A  
701 Systematic Review. Medical care research and review : MCRR.  
702 2020:1077558719901216.  
703
- 704 23. Mares M, McNally S, Fernandez R. Effectiveness of nurse-led cardiac  
705 rehabilitation programs following coronary artery bypass graft surgery: a systematic  
706 review. 2018;16(12):2304-29.  
707
- 708 24. Audet L, Paquette L, Bordeleau S, Lavoie-Tremblay M, Kilpatrick K. The  
709 association between advanced practice nursing roles and outcomes in adults following  
710 cardiac surgery: A systematic review of randomized controlled trials. International  
711 journal of Nursing Studies. 2021.  
712
- 713 25. Kwak C, Ko Y. Clinical Nurse Specialist–Led Implementation of an Early  
714 Discharge Protocol After Cardiac Surgery. Clin Nurse Spec. 2019;33(4):184-90.  
715
- 716 26. Doyle L. A systematic review to enquire is Advanced Nurse Practitioner care  
717 more effective for the cardiac surgery patient, compared to standard care. European  
718 Journal of Cardiovascular Nursing. 2015;1:90.  
719
- 720 27. Hall MH, Esposito RA, Jahn L, Blenderman R, Hartman AR, Pekmezaris R, et al.  
721 Cardiac surgery nurse practitioner home visits prevent coronary artery bypass graft  
722 readmissions. Annals of Thoracic Surgery. 2014;97(5):1488-95.  
723
- 724 28. Southey D, Mishra PK, Nevill A, Aktuerk D, Luckraz H. Continuity of care by  
725 cardiothoracic nurse practitioners: Impact on outcome. Asian Cardiovascular and  
726 Thoracic Annals. 2014;22(8):944-7.  
727
- 728 29. Skinner H, Skoyles J, Redfearn S, Jutley R, Mitchell I, Richens D. Advanced care  
729 nurse practitioners can safely provide sole resident cover for level three patients: impact

- 730 on outcomes, cost and work patterns in a cardiac surgery programme. European  
731 Journal Of Cardio-Thoracic Surgery. 2013;43(1):19-22.  
732
- 733 30. Bourgon Labelle J, Farand P, Vincelette C, Dumont M, Le Blanc M, Rochefort  
734 CM. Validation of an algorithm based on administrative data to detect new onset of atrial  
735 fibrillation after cardiac surgery. BMC Medical Research Methodology. 2020;20(1).  
736
- 737 31. Needleman J, Buerhaus P, Pankratz VS, Leibson CL, Stevens SR, Harris M.  
738 Nurse staffing and inpatient hospital mortality. New England Journal of Medicine.  
739 2011;364(11):1037-45.  
740
- 741 32. von Elm E, Altman DG, Egger M, Pocock SJ, Gøtzsche PC, Vandenbroucke JP.  
742 The Strengthening the Reporting of Observational Studies in Epidemiology (STROBE)  
743 Statement: guidelines for reporting observational studies. International Journal Of  
744 Surgery (London, England). 2014;12(12):1495-9.  
745
- 746 33. Bourgon Labelle J. Associations entre les pratiques quotidiennes de gestion du  
747 personnel de soins et l'incidence de la fibrillation auriculaire postopératoire en chirurgie  
748 cardiaque. Savoirs UdeS: Université de Sherbrooke; 2020.  
749
- 750 34. Ordre des infirmières et infirmiers du Québec. Encadrement de la pratique des  
751 IPS Montréal [internet]. Québec (Can):Ordre des infirmières et infirmiers du  
752 Québec;2021 [updated 2021 cited 2021 Aug 24]. Available from:  
753 [https://www.oiq.org/en/pratique-professionnelle/pratique-avancee/ips/encadrement-de-](https://www.oiq.org/en/pratique-professionnelle/pratique-avancee/ips/encadrement-de-la-pratique-des-ips)  
754 [la-pratique-des-ips](https://www.oiq.org/en/pratique-professionnelle/pratique-avancee/ips/encadrement-de-la-pratique-des-ips)  
755
- 756 35. Hoffman LA, Guttendorf J. Integrating Nurse Practitioners into the Critical Care  
757 Team. Critical Care Alert. 2014;21(12).  
758
- 759 36. Canadian Institute of Health Information. Canadian Coding Standards for ICD-10-  
760 CA and CCI [internet].Ottawa (Can):Canadian Institute of Health Information; 2019  
761 [updated 2019 cited 2021 Aug 24]. Available from:  
762 <https://secure.cihi.ca/estore/productSeries.htm?pc=PCC189>.  
763
- 764 37. Yenipinar A, Koç Ş, Çanga D, Kaya F. Determining Sample Size in Logistic  
765 Regression with G-Power. Black Sea Journal of Engineering and Science.  
766 2019;2(1):16-22.  
767
- 768 38. Coleman N, Halas G, Peeler W, Casaclang N, Williamson T, Katz A. From  
769 patient care to research: a validation study examining the factors contributing to data  
770 quality in a primary care electronic medical record database. BMC Family Practice  
771 [Internet]. 2015; 16(1):11.  
772
- 773 39. Sudeh C-S, Hardeep S, David R, Jill S, Morris R, Aneez E, et al. Missed  
774 diagnostic opportunities and English general practice: a study to determine their  
775 incidence, confounding and contributing factors and potential impact on patients through

- 776 retrospective review of electronic medical records. *Implementation Science* [Internet].  
777 2015; 10(1):105.
- 778
- 779 40. Tremblay J-A, Laramée P, Lamarche Y, Denault A, Beaubien-Souligny W,  
780 Frenette A-J, et al. Potential risks in using midodrine for persistent hypotension after  
781 cardiac surgery: a comparative cohort study. *Annals of intensive care*. 2020;10(1):1-8.  
782
- 783 41. Kuhns BD, Hannon CP, Makhni EC, Alter J, Mather RC, 3rd, Salata MJ, et al. A  
784 Comparison of Clinical Outcomes After Unilateral or Bilateral Hip Arthroscopic Surgery:  
785 Age- and Sex-Matched Cohort Study. *The American journal of sports medicine*.  
786 2017;45(13):3044-51.  
787
- 788 42. Ravi B, Pincus D, Wasserstein D, Govindarajan A, Huang A, Austin PC, et al.  
789 Association of Overlapping Surgery With Increased Risk for Complications Following  
790 Hip Surgery: A Population-Based, Matched Cohort Study. *JAMA internal medicine*.  
791 2018;178(1):75-83.  
792
- 793 43. Oichi T, Chikuda H, Ohya J, Ohtomo R, Morita K, Matsui H, et al. Mortality and  
794 morbidity after spinal surgery in patients with Parkinson's disease: a retrospective  
795 matched-pair cohort study. *Spine journal*. 2017;17(4):531-7.  
796
- 797 44. Charlson ME, Pompei P, Ales KL, MacKenzie CR. A new method of classifying  
798 prognostic comorbidity in longitudinal studies: development and validation. *Journal of*  
799 *chronic diseases*. 1987;40(5):373-83.  
800
- 801 45. Quan H, Li B, Couris CM, Fushimi K, Graham P, Hider P, et al. Updating and  
802 validating the Charlson comorbidity index and score for risk adjustment in hospital  
803 discharge abstracts using data from 6 countries. *American Journal of Epidemiology*.  
804 2011;173(6):676-82.  
805
- 806 46. Terwee CB, Prinsen C, Chiarotto A, de Vet H, Bouter LM, Alonso J, et al.  
807 COSMIN methodology for assessing the content validity of PROMs—user manual.  
808 Amsterdam: VU University Medical Center. 2018.  
809
- 810 47. Holt TP, Loraas TM. Using qualtrics panels to source external auditors: A  
811 replication study. *Journal of Information Systems*. 2019;33(1):29-41.  
812
- 813 48. Streiner DL, Norman GR, Cairney J. *Health measurement scales : a practical*  
814 *guide to their development and use*. Oxford: Oxford University Press; 2015.  
815
- 816 49. Grant JS, Davis LL. Selection and use of content experts for instrument  
817 development. *Research in nursing & health*. 1997;20(3):269-74.  
818
- 819 50. O'Brien SMP, Shahian DMMD, DeLong ERP, Normand S-LTP, Edwards FHMD,  
820 Ferraris VAMD, et al. Quality Measurement in Adult Cardiac Surgery: Part 2—Statistical

- 821 Considerations in Composite Measure Scoring and Provider Rating. *The Annals of*  
822 *Thoracic Surgery*. 2007;83(4 Supplement):S13-S26.
- 823
- 824 51. Shahian D, Edwards F, Ferraris V, Haan C, Rich J, Normand S, et al. Quality  
825 Measurement in Adult Cardiac Surgery: Part 1—Conceptual Framework and Measure  
826 Selection. *The Annals of Thoracic Surgery*. 2007;83(4 Supplement):S3-S12.
- 827
- 828 52. Dubois CA, D'Amour D, Tchouaket E, Clarke S, Rivard M, Blais R. Associations  
829 of patient safety outcomes with models of nursing care organization at unit level in  
830 hospitals. *International journal for quality in health care : journal of the International*  
831 *Society for Quality in Health Care*. 2013;25(2):110-7.
- 832
- 833 53. Gearing RE, Mian IA, Barber J, Ickowicz A. A methodology for conducting  
834 retrospective chart review research in child and adolescent psychiatry. *Journal of the*  
835 *Canadian Academy of Child and Adolescent Psychiatry*. 2006;15(3):126-34.
- 836
- 837
- 838 54. Vassar M, Holzmann M. The retrospective chart review: important  
839 methodological considerations. *Journal of educational evaluation for health professions*.  
840 2013;10:12.
- 841
- 842 55. McHugh ML. Interrater reliability: the kappa statistic. *Biochemia medica*.  
843 2012;22(3):276-82.
- 844
- 845 56. Tchouaket E, Boivin S, Robins S, Sia D, Kilpatrick K, Brousseau S, et al.  
846 Development and validation of a time and motion guide to assess the costs of  
847 prevention and control interventions for nosocomial infections: A Delphi method among  
848 experts. *PLoS ONE [Internet]*. 2020; 15(11).
- 849
- 850 57. Rym B, Hendy A, Marine L, Olivier S, Corinne A. Using and reporting the Delphi  
851 method for selecting healthcare quality indicators: a systematic review. *PLoS ONE*  
852 *[Internet]*. 2011; 6(6).
- 853
- 854 58. Polit DF, Beck CT, Owen SV. Is the CVI an acceptable indicator of content  
855 validity? Appraisal and recommendations. *Research in Nursing & Health*.  
856 2007;30(4):459-67.
- 857
- 858 59. Vaismoradi M, Salsali M, Turunen H, Bondas T. A qualitative study on Iranian  
859 nurses' experiences and perspectives on how to provide safe care in clinical practice.  
860 *Journal of Research in Nursing*. 2013;18(4):351-65.
- 861
- 862 60. Tabachnick, Fidell. *Using multivariate statistics*. Sixth edition.. ed. Fidell L, editor:  
863 Boston : Pearson Education; 2013.
- 864
- 865 61. Ibrahim JG, Chu H, Chen M-H. Missing data in clinical studies: issues and  
866 methods. *J Clin Oncol*. 2012;30(26):3297.

- 867  
868 62. Armstrong RA. When to use the Bonferroni correction. *Ophthalmic &*  
869 *physiological optics : the journal of the British College of Ophthalmic Opticians*  
870 *(Optometrists)*. 2014;34(5):502-8.  
871  
872 63. Daoud JI, editor *Multicollinearity and regression analysis*. *Journal of Physics:*  
873 *Conference Series*; 2017: IOP Publishing.  
874  
875 64. Kilpatrick K, Tchouaket E, Carter N, Bryant-Lukosius D, DiCenso A. Structural  
876 and Process Factors That Influence Clinical Nurse Specialist Role Implementation.  
877 *Clinical Nurse Specialist*. 2016;30(2):89-100.  
878  
879 65. Olive DJ. *Linear regression*. Cham, Switzerland: Springer; 2017.  
880  
881 66. Ramakrishnan N, Hanauer D, Keller B. Mining electronic health records.  
882 *Computer*. 2010;43(10):77-81.  
883  
884  
  
885  
  
886  
  
887  
  
888  
  
889  
  
890  
  
891



**Figure 1. The confounding variables and the level of adherence to best-practice guidelines by interprofessional teams with and without acute care nurse practitioners in cardiac surgery**

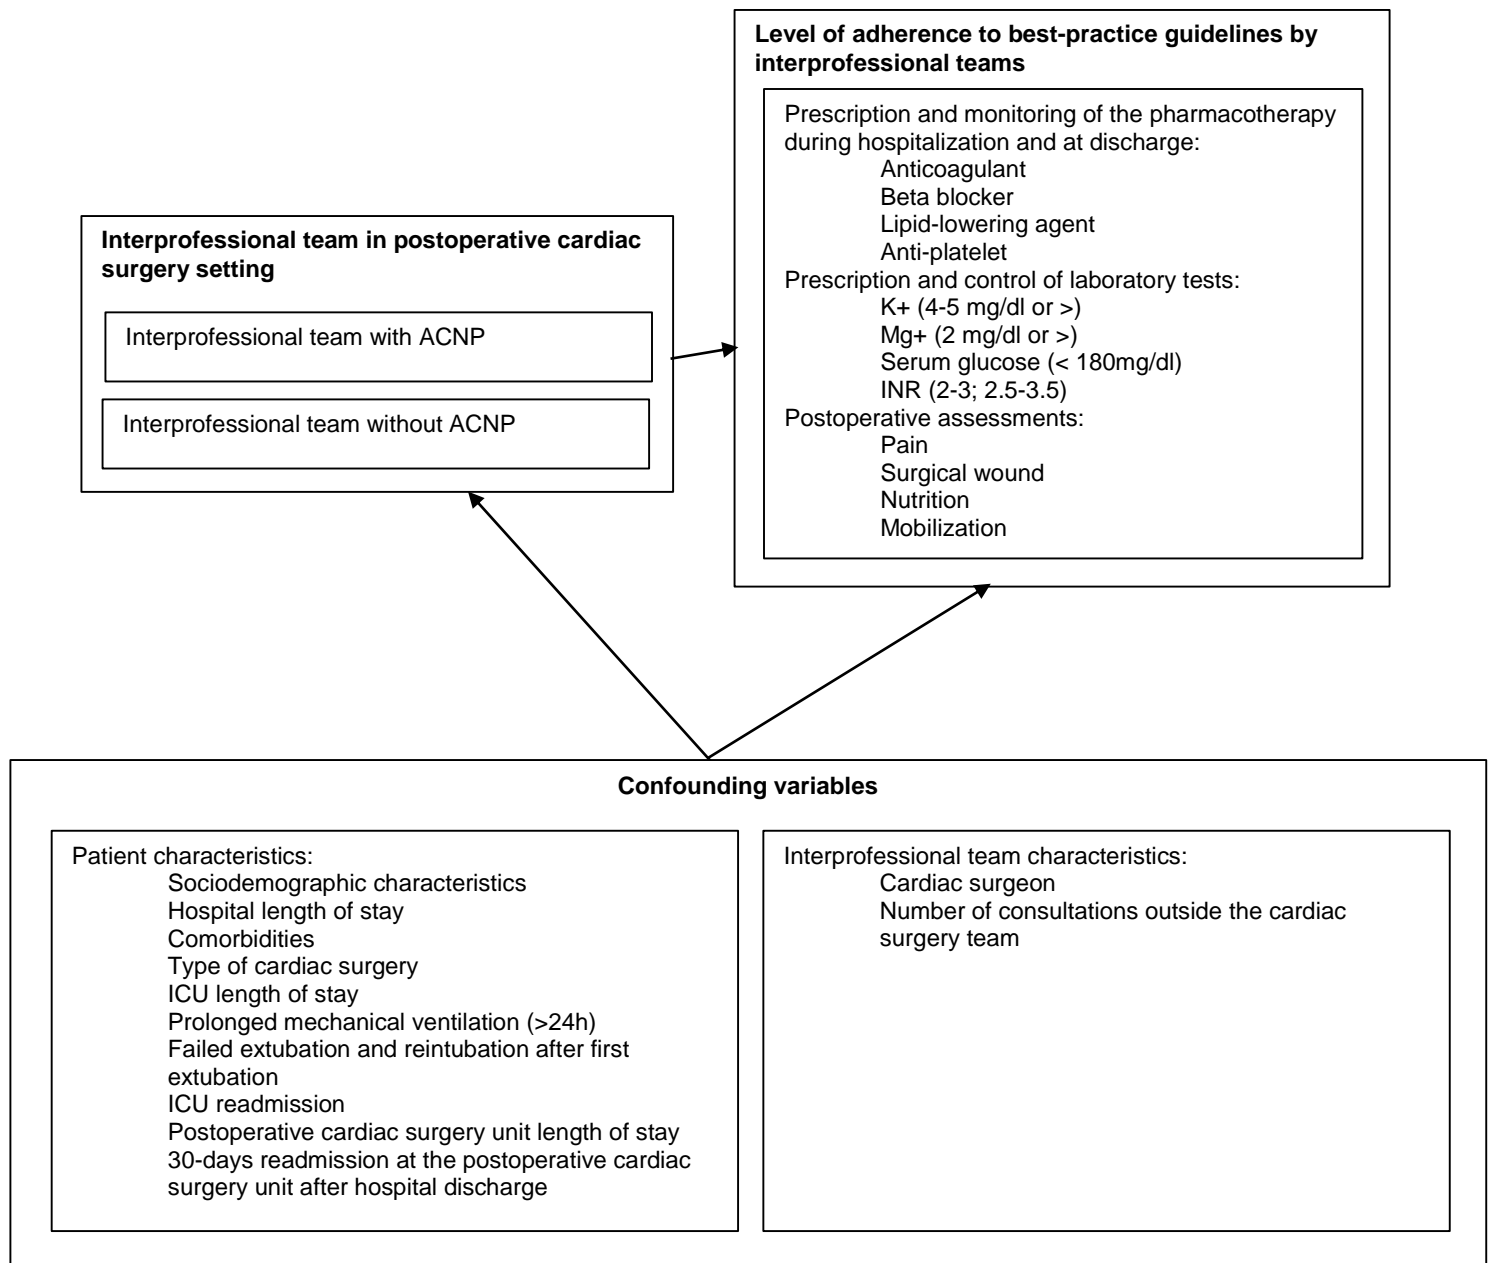

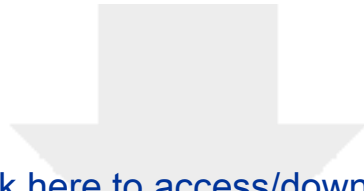

Click here to access/download  
**Supporting Information**  
supporting\_information.docx

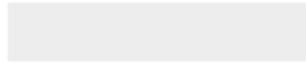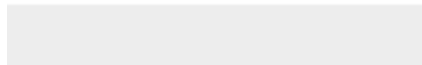

1  
2  
3  
4  
5  
6  
7  
8  
9  
10  
11  
12  
13  
14  
15  
16  
17  
18  
19  
20  
21  
22  
23  
24  
25  
26  
27  
28  
29  
30  
31  
32  
33  
34  
35  
36  
37  
38

**The level of adherence to best-practice guidelines by interprofessional teams with and without acute care nurse practitioners in cardiac surgery: a study protocol**

Formatted: Numbering: Continuous

**Authors and affiliations:** Li-Anne Audet, RN.<sup>1</sup>, M.Sc, Mélanie Lavoie-Tremblay, RN.<sup>2</sup>, Ph.D, Éric Tchouaket, Ph.D<sup>3</sup>, Kelley Kilpatrick, RN., Ph.D<sup>1,4,5</sup>

<sup>1</sup> McGill University, Ingram School of Nursing, Faculty of Medicine and Health Sciences, 680 Sherbrooke West, Suite 1800, Montreal, QC, Canada, H3A2M7

<sup>2</sup> Université de Montréal, Faculté des sciences infirmières, Pavillon Marguerite-d'Youville, 2375 chemin de la Côte-Ste-Catherine, Montreal, QC, Canada, H3T1A8

Formatted: French (Canada)

<sup>3</sup> Université du Québec en Outaouais, Département des sciences infirmières, 5 rue Saint-Joseph, Saint-Jérôme, QC, Canada, J7Z0B7

<sup>4</sup> Centre intégré universitaire de santé et de services sociaux de l'Est-de-l'Île-de-Montréal-Hôpital Maisonneuve-Rosemont (CIUSSS-EMTL-HMR), 5415, boulevard de l'Assomption, Montreal, QC, Canada, H1T 2M4

<sup>5</sup> Susan E. French Chair in Nursing Research and Innovative Practice, McGill University, Ingram School of Nursing, Faculty of Medicine and Health Sciences, 680 Sherbrooke West, Suite 1800, Montreal, QC, Canada, H4A 2M7

**Corresponding author:** Li-Anne Audet, Ingram School of Nursing, McGill University, 680 Sherbrooke Street West, Montreal, QC, H3A2M7, Email address: [li-anne.audet@mail.mcgill.ca](mailto:li-anne.audet@mail.mcgill.ca)

Word count: 5,721

39

40 **The level of adherence to best-practice guidelines by interprofessional teams**  
41 **with and without acute care nurse practitioners in cardiac surgery: a study**  
42 **protocol**

43 **Short title**

44 Adherence to best-practice guidelines by interprofessional teams with and without acute  
45 care nurse practitioners

46 **Abstract**

47 **Background**

48 Acute care nurse practitioners (ACNP) ~~have been implemented~~ in postoperative cardiac  
49 surgery settings ~~and have shown to~~ provide significant benefits to patients and  
50 organizations. ~~To explain these associations,~~ recent studies have suggested that ACNP  
51 increase the level of adherence to best-practice guidelines by interprofessional teams.

52 **However, it is** unknown if interprofessional teams with ACNP are associated with higher  
53 levels of adherence to best-practice guidelines compared to interprofessional teams  
54 without ACNP. Furthermore, no extraction tool is available to measure the level of  
55 adherence to best-practice guidelines by interprofessional teams in postoperative  
56 cardiac surgery settings. This project aims to examine the level of adherence to best-  
57 practice guidelines of interprofessional teams with and without ACNP in a postoperative  
58 cardiac surgery setting in Québec, Canada.

59 **Methods**

60 A retrospective observational study will be conducted of 300 patients hospitalized  
61 between January 1, 2019 and January 31, 2020 in a postoperative cardiac surgery unit

62 in Québec, Canada. Data will be collected from patient health records and electronic  
63 databases. An extraction tool will be developed based on systematic review of the  
64 literature, and will include best-practice guidelines and confounding variables related to  
65 patient and interprofessional teams' characteristics. Content and criterion validation,  
66 and a pilot-test will be conducted for the development of the tool. A multivariate linear  
67 regression model will be developed and adjusted for ~~several~~ confounding variables, in  
68 order to examine the association between interprofessional teams with and without  
69 ACNP, and the level of adherence to best-practice guidelines.

#### 70 **Discussion**

71 This project represents the first study to examine the level of adherence to best-practice  
72 guidelines by interprofessional teams with and without ACNP in a postoperative cardiac  
73 surgery setting. The findings of this project will generate empirical data focusing on the  
74 contribution of ACNP within interprofessional teams, and ultimately enhance the  
75 delivery of high quality and evidence-based care for patients and families.

#### 76 **Keywords**

77 Acute care nurse practitioner, best-practice guidelines, cardiac surgery,  
78 interprofessional teams, quality of care

79

80

81

82

83

84

85 **Background**

86 Cardiac surgeries are one of the leading types of surgical procedures performed  
87 internationally. In 2017, approximately 1 million patients throughout the world underwent  
88 a cardiac surgery (1). Most of cardiac surgeries are performed in developed countries

Formatted: Highlight

89 (1). In 2018, the Society of Thoracic Surgeons (STS) reported 287,872 cardiac  
90 surgeries and procedures performed in the United States (2). In Canada, 42,989  
91 coronary artery bypass grafts (CABG) and 7,186 valve repairs were performed between  
92 2013 and 2016 (3, 4). 

93 In the postoperative phase after the surgery, many patients are at high risk of  
94 developing adverse events and postoperative complications such as myocardial  
95 infarction and wound infection (5). These complications are associated with higher risk  
96 of mortality and development of comorbidities (e.g., heart failure), as well as a decrease  
97 in the well-being and quality of life of patients and families (6). For healthcare  
98 organizations, adverse events and postoperative complications are associated with a  
99 longer length of stay at the hospital, higher rates of readmission in intensive care units,  
100 higher rates of surgical re exploration, and an increase in cost (7, 8).

101 To prevent the risk of adverse events and postoperative complications for  
102 patients and families, international healthcare organizations and research teams have  
103 developed best-practice guidelines (7, 9). Best-practice guidelines are defined as  
104 evidence-based practice of care, and aim to ensure the performance of  
105 interprofessional teams, enhancing the quality and safety of the care given to patients  
106 and families. In postoperative cardiac surgery settings, best-practice guidelines related  
107 to the pharmacotherapy, laboratory tests, clinical indicators, and lifestyle promotion

108 (e.g., diet, cardiac rehabilitation) have been developed and implemented in healthcare  
109 centres (2).

110 A consensus in the literature supports the importance of a high level of  
111 adherence by interprofessional teams to best-practice guidelines, in order to ensure  
112 their efficacy (7, 10). Adherence to best-practice guidelines is defined as the  
113 achievement of the guideline, as well as the associated interventions performed by  
114 clinicians (11). In surgical settings (e.g., neurosurgery, orthopedic surgery) international  
115 research teams (12-15) have developed composite scores to examine the level of  
116 adherence to best-practice guidelines by interprofessional teams. Their findings  
117 suggested that a higher level of adherence is associated with a higher quality of care  
118 given to patients and families.

119 In postoperative cardiac surgery settings, recent studies (5, 16) identified a  
120 significant association between a high level of adherence to best-practice guidelines by  
121 interprofessional teams and a lower risk of postoperative complications and adverse  
122 events for patients. Other studies (5, 16, 17) have shown a significant association  
123 between a lower level of adherence to best-practice guidelines by interprofessional  
124 teams and a higher risk of postoperative complications and adverse events for patients.  
125 Larrazzet et al. (2014) conducted a longitudinal study of 144 patients who died after  
126 cardiac surgery. The authors identified a significant association between a lack of  
127 adherence to best-practice guidelines by interprofessional teams, and a higher risk of  
128 mortality, highlighting the importance of the high adherence to best-practice guidelines  
129 by interprofessional teams (17).

130 Internationally, there is variability in the scope of practice and level of autonomy  
131 of ACNPs (18,19). Recent studies have examined the practice of nurse practitioners  
132 (NP) within primary and acute care settings, and suggested that their practice could  
133 increase the level of adherence to best-practice guidelines by interprofessional teams  
134 (18, 19). ~~The NP's support of the practice of different~~ care providers in the team with a  
135 focus on best evidence is believed to underpin providers' adherence to best-practice  
136 guidelines focused on pharmacotherapy, clinical indicators, and lifestyle promotion. NPs  
137 also enhance collaboration and communication among teams' members and facilitate  
138 continuity of care, contributing to ~~the~~ higher adherence to best-practice guidelines by  
139 interprofessional teams (18, 20).

Formatted: Highlight

140 Based on the International Council of Nurses guidelines, the NP is an advanced  
141 practice nursing role, based on a graduate or postgraduate education and an in-depth  
142 nursing and medical expertise (21-23). In ~~several acute care settings, including~~  
143 ~~postoperative cardiac surgery, acute care nurse practitioners (ACNP)~~ have been  
144 implemented in interprofessional teams and performed activities such as the clinical and  
145 psychosocial assessment of patients, the prescription and management of  
146 pharmacotherapy, laboratory tests and clinical interventions, lifestyle promotion,  
147 teaching of coping strategies, preparation for hospital discharge, and the management  
148 of consultations and external resources (24). International research teams (23, 25) have  
149 examined the practice of ACNPs within postoperative cardiac surgery settings. They  
150 identified significant associations between ~~the~~ ACNPs' practice and higher patient  
151 satisfaction, higher participation of patients to cardiac rehabilitation, and lower length of  
152 stay ~~at the~~ hospital after ~~the~~ cardiac surgery. However, other research teams (21, 26)

Formatted: Highlight

Formatted: Highlight



153 did not identify significant associations between ACNP practice and patient and  
154 organizational outcomes within postoperative cardiac surgery settings. More  
155 specifically, the authors suggested that the difficulty of recruiting participants, the high  
156 attrition rate, the small sample sizes, and the inability to adjust the data analysis for  
157 confounding variables related to the patient and interprofessional teams' characteristics were important limits contributing to the non-significant findings (21,26).  
158 Systematic reviews of randomized controlled trials (RCT) (21, 23) have been  
160 conducted to understand the inconsistent findings in the current literature. These  
161 systematic reviews have identified three important limits contributing to the inconsistent  
162 findings of the current literature. Firstly, although several RCT of the current literature  
163 focus on the efficacy of ACNP for patients and healthcare organizations, less attention  
164 has been paid to the efficacy of these providers for interprofessional teams. The  
165 qualitative study of Reich et al. (2018) suggested that the implementation of ACNP  
166 within interprofessional teams increases the level of adherence of those teams to best-  
167 practice guidelines in postoperative cardiac surgery settings, and represents an  
168 underlying factor contributing to the efficacy of NP (19). However, these propositions  
169 have not been subjected to statistical validation, thus it is unknown if interprofessional  
170 teams with ACNP are associated with higher levels of adherence to best-practice  
171 guidelines, compared to interprofessional teams without ACNP. Moreover, until today,  
172 no validated extraction tool is available to measure the level of adherence to best-  
173 practice guidelines of interprofessional teams with and without ACNP in postoperative  
174 cardiac surgery settings.

Formatted: Highlight

175 Secondly, systematic reviews have highlighted ~~the difficulty~~ in adequacy  
176 controlling confounding variables in ~~the existing~~ RCT (21, 23). Confounding variables  
177 represent important factors influencing the efficacy of ACNP on patient and  
178 organizational outcomes in postoperative cardiac surgery settings. Methodological limits  
179 of the existing RCT, such as the small sample size and high attrition rate, limit the  
180 capacity of research teams to develop robust multivariate statistical models adjusted for  
181 confounding variables related to patient, interprofessional teams, and organizational  
182 characteristics (21, 23). Interestingly, retrospective observational studies have shown to  
183 be a relevant alternative to examine the association between ACNP and patient and  
184 organizational outcomes in postoperative cardiac surgery settings. Existing studies (27-  
185 30) have used retrospective observational studies to ~~gather~~ a large cohort of patients,  
186 ~~limit attrition~~, and develop statistical models adjusted for many confounding variables.  
187 These studies (6, 27-29) have identified significant associations between ACNP within  
188 interprofessional teams, and lower ~~risks of mortality~~ and decreased costs in  
189 postoperative cardiac surgery settings.

190 Thirdly, the majority of the RCT **focus on ACNP practice** within primary care  
191 settings (e.g., in-home care, rehabilitation clinic) after the cardiac surgery. Less  
192 attention has been paid to ACNP **practice** in acute care settings; however, within these  
193 settings, ACNP works in collaboration with cardiac surgeons, nursing teams,  
194 rehabilitation teams, social workers, and other members of ~~the~~ interprofessional teams  
195 to ensure ~~the patient~~ optimal recovery after the **surgery**, and ~~prevents the risk of~~  
196 ~~adverse events and postoperative complications~~. Moreover, for patients and families,  
197 ~~the acute care hospitalization after the surgery~~ represents a crucial phase of ~~their~~

Formatted: Highlight

Formatted: Highlight

Formatted: Highlight

198 postoperative recovery and is associated with several physical, psychosocial, and  
199 emotional stressors (30). Future studies are needed to substantiate the contribution of  
200 ACNP in interprofessional teams within acute care settings, and identify the benefits of  
201 their practice for patients, families, interprofessional teams, and healthcare  
202 organizations. 

Formatted: Highlight

203 Consequently, the aim of this project is to examine the level of adherence to  
204 best-practice guidelines of interprofessional teams with and without ACNP in acute  
205 postoperative cardiac surgery settings in Québec, Canada.

Formatted: Highlight

## 206 **Study hypothesis and objectives**

Formatted: Highlight

207 **The hypothesis of this study is:**

208 **H1: This study will verify if interprofessional teams with ACNP are associated**  
209 **with a higher level of adherence to best-practice guidelines compared to**  
210 **interprofessional teams without ACNP, after controlling for the patient and**  
211 **interprofessional team characteristics.** 

212 The objectives of this study are as follows:

- 213 1. Develop and pilot-test an extraction tool to measure the level of adherence to  
214 best-practice guidelines of interprofessional teams within postoperative cardiac  
215 surgery setting.
- 216 2. Describe the patient and interprofessional teams' characteristics, as well as the  
217 level of adherence to best-practice guidelines, of patients under the care of  
218 interprofessional teams with and without ACNP.
- 219 3. Examine the association between interprofessional teams with ACNP and the  
220 level of adherence to best-practice guidelines, compared to interprofessional

221 teams without ACNP, ~~after adjusting patient and interprofessional team~~  
222 ~~characteristics in postoperative cardiac surgery setting.~~

## 223 **Methods and design**

### 224 **Study design**

225 A retrospective observational study (31, 32) will be conducted. De-identified data will be  
226 extracted from the UHC data **warehouse**, and the patient health records ~~to assemble~~  
227 ~~the retrospective cohort of patients and conduct the data collection.~~ Ethics approval was  
228 obtained from the McGill University Health Centre Research Ethics Board on  
229 September 15, 2021 (IPSSA chirurgie cardiaque/2022-8094). ~~This project uses the~~  
230 ~~guidelines from~~ *Strengthening the Reporting of Observational Studies in Epidemiology*  
231 *(STROBE) Statement: Guidelines for Reporting Observational Studies* (32) were used  
232 for this project (SA appendix).

### 233 **Study setting**

234 **This study will be conducted at a University healthcare centre (UHC) in Québec,**  
235 **Canada. Annually, this healthcare centre performs approximately 1,000 cardiac**  
236 **surgeries and has a 36-bed postoperative cardiac surgery unit.** 

237 After cardiac surgery, patients are admitted to the intensive care unit (ICU), and  
238 are under the care of ICU teams. At the time of data collection, the ICU teams in  
239 Québec, Canada do not include ACNP. On average, patients are hospitalized for 24  
240 hours in the ICU before being transferred to the postoperative cardiac surgery unit.  
241 Patients readmitted to the ICU are under the care of ICU teams.

242 Upon admission to the postoperative cardiac surgery unit, patients are assigned  
243 to the care of interprofessional teams with or without ACNP. Team assignment depends

Formatted: Font color: Red, Highlight

Formatted: Highlight

244 on the current workload of each team, and the availability of the beds in the unit.  
245 Interprofessional teams with ACNPs are assigned 16 of the unit's beds (44%) and  
246 interprofessional teams without ACNP are assigned 20 of the unit's beds (56%).  
247 Patients are followed by their respective teams from their admission to the cardiac  
248 surgery unit, until the hospital discharge or death. On average, the length of stay at the  
249 hospital after the surgery ranges from 9 to 11 days (33).

250 Interprofessional teams with and without ACNP include the following: cardiac  
251 surgeons and residents nursing teams, skin care and wound therapists,  
252 physiotherapists, nutritionists, respiratory therapists, social workers, and medical and  
253 other specialists. Interprofessional teams with and without ACNP ensure the daily  
254 follow-up of patients, the assessment of the patient's clinical and psychosocial condition,  
255 the management of pharmacotherapy, clinical intervention, laboratory tests, lifestyle  
256 promotion, and the preparation of patients upon hospital discharge.

257 **The practice of acute care nurse practitioners in postoperative cardiac surgery**  
258 **unit**

259 Since 2017, seven ACNPs practice in postoperative cardiac surgery, based on a  
260 monthly rotation system. Two ACNP simultaneously practice within interprofessional  
261 teams and collaborate with other clinicians to ensure the daily follow-up of the patients  
262 after cardiac surgery. ACNP practice includes the assessment of the clinical and  
263 psychosocial condition of the patient and families, the management of ~~the~~  
264 pharmacotherapy, clinical interventions, and laboratory tests. The ACNP also teaches  
265 coping strategies, lifestyle promotion, cardiac rehabilitation, preparation of the patients  
266 and families for the in-home recovery after discharge. **The ACNP supports the**

Formatted: Highlight

267 preparation for -hospital discharge (e.g., prescription of the patient medication after  
268 discharge, -summary for the family physician, etc.) (34).

### 269 Study population and sample

270 A dynamic cohort of patients will be assembled from hospitalized patients at the  
271 postoperative cardiac surgery unit between January 1, 2019, and January 31, 2020.  
272 This timeframe will avoid the recruitment of patients during the COVID-19 pandemic, a  
273 window of time during which the practice of ACNP within the unit was inconsistent.  
274 Patients will be selected, based on three inclusion criteria: 1) patient admitted for a  
275 diagnosis of CABG and/or valve repair, 2) patient age is over 18 years old, and 3)  
276 patient has been hospitalized for at least 24 hours in the postoperative cardiac surgery  
277 unit. The minimum 24-hour criteria will allow our team to examine the hospitalization of  
278 the patient in the postoperative cardiac surgery unit, which is the setting where ACNPs  
279 practice in Québec (35). Patients will be identified from the electronic databases of the  
280 UHC and the diagnostic codes of the Canadian Institute for Health Information (36) (SB  
281 appendix).

282 A sample size calculation was conducted in G\*power (37). This project will  
283 include 15 variables, including one independent variable, one dependent variable, and  
284 13 confounding variables. The variables selected for this project are described in the  
285 next section. To perform one multivariate linear regression model and detect an effect  
286 size of  $f^2=0.15$  with a power of 0.80 and a standard error of 5%, a minimum sample size  
287 of 183 patients was estimated.

288 A total of 300 patients will be selected, based on the sample size calculation and  
289 an over-estimation of at least 20%, to consider the risk of error from the presence of

Formatted: Highlight

290 missing data and incomplete patient health records (38, 39). A systematic random  
291 selection of 150 patients under the care of interprofessional teams with ACNP will be  
292 conducted and matched with 150 patients under the care of interprofessional teams  
293 without ACNP. Three criteria (40-43) will be used to match each pair (1:1): 1) age (i.e., a  
294 five-year gap will be tolerated) 2) sex, and 3) type of cardiac surgery (i.e., CABG, valve  
295 repair, or CABG/valve repair).

296 Patients will be followed from their admission to the ICU after the cardiac  
297 surgery, until the occurrence of the following events, whichever occurs first: 1)  
298 discharge from the hospital, 2) death, or 3) the cumulation of 14-days in hospital after  
299 the surgery. The 14-days' timeframe will allow our team to capture the acute phase of  
300 the patient hospitalization after the cardiac surgery (33). The total length of stay for  
301 patients hospitalized longer than 14-days will be measured.

#### 302 **Variables under study**

303 A systematic review of RCTs (24) and an extensive search in the literature and  
304 international healthcare organizations (e.g., American Heart Association, Society of  
305 Thoracic Surgeons) was conducted to retrieve best-practice guidelines for  
306 interprofessional teams in postoperative cardiac surgery settings, and confounding  
307 variables related to patient and interprofessional teams' characteristics. A total of 12  
308 best-practice guidelines and 13 confounding variables were identified and presented in  
309 Figure 1. The operationalization of each variable is presented in SC appendix.

310 *Independent variable: interprofessional teams with and without acute care nurse*  
311 *practitioner*

312 A dichotomous variable will be created to measure the inclusion of at least one ACNP  
313 within the interprofessional team. For patients under the care of an interprofessional  
314 team with ACNP, an additional descriptive variable will measure the number of days  
315 where the ACNP was implicated in the daily follow-up of the patient, on the entire  
316 hospitalization at the postoperative cardiac surgery unit.

317 *Dependant variable: the level of adherence to best-practice guidelines by*  
318 *interprofessional teams*

319 A composite score will be developed to measure the level of adherence to best-practice  
320 guidelines by interprofessional teams. An individual composite score will be calculated  
321 per patient per day of hospitalization at the postoperative cardiac surgery unit. A total of  
322 12 best-practice guidelines will be included in the composite score (Figure 1). Each  
323 best-practice guideline will be scored on two points based on the following: 1) the  
324 achievement of the guideline recommendation (e.g., prescription of beta blocker) and 2)  
325 the associated interventions performed by clinicians (e.g., follow-up of the blood  
326 pressure). All best-practice guidelines are divided into three categories: 1)  
327 pharmacotherapy (n=4), 2) laboratory tests (n=4), and 3) postoperative assessment  
328 (n=4).

329 Four best-practice guidelines are included in the category of pharmacotherapy.  
330 These guidelines are the prescription and monitoring of medications including: 1)  
331 anticoagulants, 2) beta blockers, 3) lipid-lowering agents, and 4) anti-platelets, during  
332 hospitalization and at hospital discharge of the patient. For each best-practice guideline,  
333 two additional descriptive variables will be collected, including the type of medication



334 prescribed and the presence of a contraindication, which precludes the possibility of  
335 achieving the guideline recommendation (e.g., allergy).

336 Four best-practice guidelines on laboratory tests are included, recommending the  
337 prescription and monitoring of the following: 1) potassium (K+), 2) magnesium (Mg+), 3)  
338 serum glucose, and 4) international normalized ratio (INR) by interprofessional teams  
339 during the patient's hospitalization in the postoperative cardiac surgery unit. The  
340 achievement of each best-practice guideline recommendation will be confirmed if the

341 laboratory result falls under the normal range supported by the current literature. An  
342 additional variable called "no INR needed" will be added specifically for the best-practice  
343 guideline related to the prescription and management of INR, to take into consideration  
344 patient who don't need a strict INR follow-up (e.g., administration of direct acting oral  
345 anticoagulant (DAOC)). A pilot test will be performed to assess the characteristics of the  
346 patients hospitalized at the post-operative cardiac surgery unit and the feasibility of the  
347 data collection. The following three additional descriptive variables will be measured for  
348 each guideline: 1) number of prescriptions requested by interprofessional teams, 2)  
349 proportion of abnormal values below or above normal range, and 3) average of all  
350 values of laboratory tests.

351 Four best-practice guidelines are included in the category of the postoperative  
352 assessment performed by interprofessional teams. A daily assessment of the patient's  
353 level of pain, surgical wound(s), nutrition, and mobilization will be measured. For each  
354 best-practice guideline recommendation, the achievement of the guideline will be  
355 confirmed if at least one postoperative assessment per day is performed by the ACNP  
356 or other members of the interprofessional teams during the patient's hospitalization in

Formatted: Highlight

357 the postoperative cardiac surgery unit. Two additional descriptive variables will be  
358 measured for each best-practice guideline, including: 1) the total number of  
359 postoperative assessments performed by interprofessional teams during the  
360 hospitalization, and 2) the type of associated interventions conducted by clinicians (e.g.,  
361 non-pharmacological, consultation, etc.).

362 *Confounding variables related to patient characteristics*

363 Eleven confounding variables related to patient characteristics will be measured. For  
364 each patient, sociodemographic characteristics (e.g., sex, age) will be measured. The  
365 total length of stay at the hospital will be measured, which includes the stay in the ICU  
366 and postoperative cardiac surgery unit. The type of cardiac surgery will be collected  
367 from a categorical variable with three categories: 1) CABG, 2) valve repair, and 3)  
368 CABG/valve repairs. Comorbidities will be measured and operationalized from the  
369 Charlson Comorbidity Index (CCI) (44, 45). A total score of 24 points will be calculated  
370 for each patient based on the 17 clinical conditions included in the CCI (SD appendix).  
371 The length of stay in the postoperative cardiac surgery unit will be collected for each  
372 patient. The hospital 30-days readmission at the postoperative cardiac surgery unit after  
373 discharge will be measured for each patient from a dichotomous variable.

374 Four confounding variables related to the patient characteristics in the ICU  
375 setting will be measured. The total number of hours hospitalized in the ICU will be  
376 measured from the time (in hours) of admission to the ICU after the surgery and the  
377 time (in hours) of discharge of the patient. The postoperative prolonged mechanical  
378 ventilation will be measured from a dichotomous variable. A prolonged mechanical  
379 ventilation will be confirmed if the time under mechanical ventilation exceeds 24 hours.

380 The failed extubation of the patient and reintubation after first extubation will be  
381 measured with a dichotomous variable. The number of episodes of ICU readmission  
382 after initial discharge will be measured for each patient.

### 383 *Confounding variables related to interprofessional teams' characteristics*

384 Two confounding variables related to interprofessional teams' characteristics will be  
385 measured. First, the cardiac surgeon who performed the surgery and ensured the  
386 follow-up of the patient's recovery will be noted. A confidential code will be created for  
387 each surgeon practising in the UHC. Second, a discrete variable will be created to  
388 measure the number of consultations conducted by clinicians from different expertises  
389 (e.g., nutrition, rehabilitation team) during the patient's hospitalization in the  
390 postoperative cardiac surgery unit. A categorical descriptive variable will be created to  
391 measure each clinician's expertise, including the following: 1) rehabilitation team (e.g.,  
392 physical therapist, occupational therapist), 2) respiratory therapist, 3) social worker, 4)  
393 skin and wound care therapist, 5) nutritionist, and 6) speciality consultation (e.g.,  
394 internal medicine, nephrology).

### 395 **Data collection**

396 An extraction tool will be developed and pilot-tested, based on the best-practice  
397 guidelines and the confounding variables related to the patient and interprofessional  
398 team characteristics (Figure 1). One extraction will be completed per patient per day  
399 during the hospitalization in the postoperative cardiac surgery unit, **by the first author or**  
400 **a research assistant.** The development of the extraction tool followed the Consensus-  
401 based Standards for the selection of health measurement instrument (COSMIN)

Formatted: Highlight

402 guidelines (46) and will include three stages: the content validation; the criteria  
403 validation; and the pilot-test.

404 *Data collection for the content validation*

405 **Content validation** will be performed following two steps (46). First, an expert committee  
406 will be recruited from clinicians, managers, and researchers who have expertise in  
407 postoperative cardiac surgery. The identification and recruitment of experts will be  
408 conducted by our research team and will include experts in Canada. A total of 10  
409 experts will be recruited, including at least the following five: 1) an ACNP who worked a  
410 minimum of one year within a postoperative cardiac surgery unit outside of our  
411 associated UHC, 2) a cardiac surgeon or fellow in cardiac surgery who worked at least  
412 two years in an acute care centre outside of our associated UHC, 3) a nurse manager  
413 who manages, at least one year, a postoperative cardiac surgery unit, within our  
414 associated UHC, 4) a healthcare professional who worked in the data warehouse of our  
415 associated UHC for at least one year, and 5) a researcher in nursing or healthcare  
416 sciences with an expertise in measurement instruments and/or cardiac surgery.

417 **Second, an electronic survey (47) will be created** and composed of all items of  
418 the extraction tool (best-practice guidelines and confounding variables). For each item,  
419 experts will assess its relevance using a 5-points Likert scale (48, 49). Additional  
420 spaces for qualitative comments and suggestions will be included in the survey. Two  
421 rounds of revision are planned. After the first round, our team will update the extraction  
422 tool and revise any unclear items based on the experts' recommendations, and an  
423 updated version will be resubmitted to the expert committee.

424 *Data collection for the criterion validation*

425 The criterion validation of the extraction tool will follow **three consecutive steps**. Firstly,  
426 the best-practice guidelines of The Society of Thoracic Surgeons (STS) have been  
427 selected as the gold standard of comparison for this study. For many years, the STS  
428 has been a leading healthcare organization in the development and validation of best-  
429 practice guidelines and performance measures in the care of patients in cardiac surgery  
430 settings (10). In 2007, the STS developed and validated 21 performance measures for  
431 the delivery of high quality of care for patients who underwent CABG, valve repair, and  
432 CABG/valve repairs (50, 51). For this project, five performance measures were  
433 selected, including: 1) prolonged mechanical ventilation higher than 24 hours in the ICU;  
434 2) a 30-day readmission rate at the postoperative cardiac surgery unit after hospital  
435 discharge; and prescription of the 3) anti-platelet, 4) beta blocker, 5) and lipid-lowering  
436 agent, during the hospitalization at the postoperative cardiac surgery unit and at  
437 discharge. Each performance measure is operationalized as the proportion of patients  
438 who achieved the outcome (e.g., proportion of patients who were under prolonged  
439 mechanical ventilation) over the total sample size (46, 47).

440 Secondly, 30 patient health records will be reviewed independently by two  
441 reviewers on two occasions, **including the first author and a research assistant**. For the  
442 first round of revision, the patient's health record will be reviewed with the extraction  
443 tool. For the second round of revision, the records will be reviewed with the five  
444 performance measures from the STS.

#### 445 *Data collection for the pilot-test*

446 A pilot-test will be conducted to assess the feasibility of the tool, standardize data  
447 collection among reviewers, examine the quality and accessibility of the retrospective

Formatted: Highlight

448 data, and update the tool if needed. Four iterative steps will be included in the pilot-test  
449 (52-55). First, two reviewers will conduct the pilot-test and data collection. Training  
450 sessions and documentation will be given to the reviewers.

451 Secondly, 30 patient health records from hospitalized patients in the  
452 postoperative cardiac surgery unit between January 1, 2019, and January 31, 2020, will  
453 be randomly selected. These patients will not be included in the retrospective cohort.  
454 Data will be collected by the two reviewers with the extraction tool. Inter-rater reliability  
455 will be assessed and a Cohen kappa higher than 0.60 will be targeted (55).

456 Thirdly, a triangulation of the available data will be performed to assess the  
457 quality and accessibility of the data. Multiple data sources will be screened between the  
458 electronic databases and patient health records. Items from the extraction tool with a  
459 high quantity of missing data or low quality of available data will be modified or  
460 removed.

461 Finally, frequent meetings among all research team members will be conducted  
462 to discuss divergences, reinforce convergences, and establish a consensus. The  
463 extraction tool will be updated after the pilot-test if needed (52).

464 During data collection from the retrospective cohort of patients, an additional 30  
465 patient health records will be reviewed by two independent reviewers to ensure the  
466 standardization of the data collection (49, 50). Inter-rater reliability will be assessed and  
467 a Cohen Kappa value higher than 0.60 will be targeted (55).

468 **Data analysis**

469 Statistical analysis will be conducted to meet objectives one, two and three. The unit of  
470 observation will be the patient-level and the unit of analysis will be the **interprofessional**  
471 **team-level.**

472 *Objective 1*

473 **The content validation** of the extraction tool will include two rounds of revisions, with  
474 additional rounds if needed (56, 57). For each round of revision, a Fleiss Kappa will be  
475 calculated and a value between 0.60 and 0.80 will be targeted (48, 49). The content  
476 validity index (CVI) of each individual item of the extraction tool will be calculated from  
477 the proportion of experts who rated a score of 4 or 5 on the Likert scale (58). A CVI of  
478 0.80 will be targeted for each item and items with a value below 0.80 will be removed or  
479 modified. Then, the proportion of items with a CVI value above 0.80 will be calculated to  
480 determine the overall CVI of the extraction tool. A value higher than 0.80 for the overall  
481 CVI of the extraction tool will be targeted (46). Qualitative comments and  
482 recommendations by experts will be analyzed by content analysis (59).

483 The criteria validation will be assessed using 30 patient health records. Five  
484 performance measures developed by the STS will serve as the gold standard for the  
485 comparison (10). First, the proportion of patients who achieved each performance  
486 measure over the total sample size (n=30) will be calculated, from the measures  
487 **collected with the gold standard**, as well as the measures collected with the extraction  
488 tool. Second, Spearman correlation will be calculated to assess the correlation between  
489 the proportions obtained from the measures of the gold standard, and the proportions  
490 obtained from the measures of the extraction tool. Values of Spearman correlation  
491 higher than 0.70 will be targeted (48, 49).

492 *Objective 2*

493 **Descriptive analysis** will be performed to assess the level of adherence by  
494 interprofessional teams with and without ACNP, as well as the confounding variables for  
495 patients under the care of both teams (60). An analysis of missing data will be  
496 conducted to examine the quality and distribution of missing data within patient health  
497 records and electronic databases. Team meetings and consultations with clinicians and  
498 statisticians will be held to discuss and identify potential causes of missing data, as well  
499 as to conduct a statistical analysis to manage them (61).

500 A composite score will be developed to measure the level of adherence to best-  
501 practice guidelines by interprofessional teams with and without ACNP. A composite  
502 score **per patient per day of hospitalization** in postoperative cardiac surgery will be  
503 developed and based on four consecutive steps. Firstly, for each best-practice  
504 guideline, a score on a scale of two will be created and points will be attributed for: 1)  
505 the achievement of the best-practice guideline recommendation, and 2) the associated  
506 intervention performed by clinicians. Points will be given based on the information  
507 contained in the patient health record and electronic databases. A missed intervention  
508 will be considered as a lack of adherence to best-practice guidelines, and no point will  
509 be given.

510 Secondly, all best-practice guidelines are divided into three categories: 1)  
511 pharmacotherapy, 2) laboratory tests, and 3) postoperative assessments. The sum of  
512 the individual score of each best-practice guideline will be calculated for each category.  
513 More specifically, each category includes four best-practice guidelines, and will be  
514 based on a total score ranging from zero to eight.



515 Thirdly, an overall composite score will be calculated from the sum of all the  
516 scores of the three categories, ranging from zero to 24. The overall composite score will  
517 be transformed into a value in percentage (0 to 100%) and an increase of the score will  
518 be associated with an increase of the level of adherence to best-practice guidelines by  
519 interprofessional teams. An overall score will be calculated per patient per each day  
520 hospitalized in the postoperative cardiac surgery unit.

521 Finally, an average composite score will be calculated from the average of all  
522 overall scores during the patient's hospitalization at the postoperative cardiac surgery  
523 unit. An average composite score will be calculated for all patients included in the  
524 retrospective cohort. A graphic illustration will be created from all average scores to  
525 visualize the tendency and distribution of the scores of the cohort.

### 526 *Objective 3*

527 Bivariate analysis will be conducted, and the statistical significance will be based on a  $p$ -  
528 value of 0.05 (60). The Bonferroni correction will be applied for the examination of each  
529 confounding variable related to the patient and interprofessional teams' characteristics  
530 (62).

531 A multivariate linear regression model will be developed to examine the  
532 association between interprofessional teams with and without ACNP and the level of  
533 adherence to best-practice guidelines (63-65). An examination of the distribution of the  
534 data will be performed. In the case of an abnormal distribution of the data, a  
535 transformation will be conducted to adjust the statistical model based on the observed  
536 data. The independent variables will include the interprofessional teams with and  
537 without ACNP, as well confounding variables. A correlation matrix will be developed,

538 and tolerance value lower than 0.2 and a variance inflation factor (VIF) value higher  
539 than 5 will be used to identify multicollinearity between independent variables (63-65).  
540 Independent variables with multicollinearity will be removed one at the time and a new  
541 regression will be calculated. The dependent variable of the regression model will be  
542 the average composite score (%) of the level of adherence to best-practice guidelines.

543 Statistical significance will be based on a  $p$ -value of 0.05. Sensitivity analysis will be  
544 conducted based on a selection of confounding variables related to the characteristics  
545 of the patient (e.g., length of stay, ICU readmission). The selection of these confounding  
546 variables will be based on the observed data and descriptive analysis. The residual  
547 analysis and the analysis of the  $R^2$  will be conducted to assess the goodness-of-fit of  
548 the multivariate linear regression model.

#### 549 **Interpretation of the findings**

550 Consultations with clinicians and managers practising in postoperative cardiac surgery  
551 settings in Québec and Canada will be conducted to gain an in-depth understanding of  
552 the findings. These consultations will allow our team to explore potential underlying  
553 factors and mechanisms which could influence the level of adherence to best-practice  
554 guidelines by interprofessional teams with and without ACNP. Field notes will be taken  
555 during these consultations and analyzed using content analysis (45).

#### 556 **Ethical considerations**

557 Ethics approval was obtained prior to the beginning of the study. No identifying  
558 information will be collected during the content validation with the expert committee and  
559 the data collection within electronic databases and patient health records. A confidential  
560 pairing system will be created to match the patient identification with a random number

Formatted: Highlight

561 (66). The database of the project will be kept in a secure server, protected by a  
562 confidential numeric code known only by the research team. During the dissemination of  
563 the findings, data will be shared in an aggregated form and the identity of the UHC, as  
564 well as the identity of the patients and clinicians, will remain confidential.

565 **Discussion**

566 ACNPs hold an important place within interprofessional teams caring for patients and  
567 families following cardiac surgery. For patients and families, ACNPs contribute to the  
568 management of pharmacotherapy, clinical and psychosocial conditions, as well as  
569 lifestyle promotion and teaching of coping strategies. For interprofessional teams,  
570 ACNPs enhance the collaboration and communication among team members and  
571 reinforce continuity of care. Until now studies examined the efficacy of ACNP on patient  
572 and organization outcomes within postoperative cardiac surgery settings; however, less  
573 attention has been paid to underlying factors contributing to the effect of ACNPs on  
574 these outcomes.

575 The findings of this study will further our understanding of the contributions of  
576 ACNPs in interprofessional teams, practising in postoperative cardiac surgery settings  
577 in Québec, Canada and internationally. This project will generate empirical data to  
578 support and document the practice of ACNPs within interprofessional teams in four  
579 important ways. Firstly, as part of this project, a systematic review of randomized  
580 controlled trials was published to retrieve the current literature on the efficacy of ACNP  
581 and advanced practice nursing roles in postoperative cardiac surgery settings, and to  
582 examine their adherence to best-practice guidelines (40). Secondly, an extraction tool  
583 focusing on the level of adherence to best-practice guidelines by interprofessional

Formatted: Highlight

584 teams in postoperative cardiac surgery will be available for the field of cardiac surgery  
585 research, and the scientific community more broadly. Thirdly, for patients under the care  
586 of interprofessional teams with and without ACNP, the findings will provide a description  
587 of the patient and interprofessional team characteristics, and as well as the adherence to  
588 best-practice guidelines for patients under the care of interprofessional teams with and  
589 without ACNP. Finally, this study will examine the effect of ACNPs on the adherence to  
590 best-practice guidelines in settings where ACNPs are incorporated within inter-  
591 professional teams, and provide evidence empirical data for those settings looking to  
592 introduce such roles in a postoperative cardiac surgery setting.

Formatted: Highlight

Formatted: Highlight

### 593 **Funding**

594 This project is funded by the Réseau de recherche en intervention en sciences  
595 infirmières du Québec (RRISIQ). Li-Anne Audet holds doctoral scholarships from the  
596 Fonds de recherche du Québec – santé as well as from the Québec Ministry of  
597 Education (Ministère de l'Éducation et de l'Enseignement Supérieur du Québec).  
598 Éric Tchouaket holds a career award from the Fonds de recherche du Québec – Santé  
599 (Junior 2 Research Salary Award). Kelley Kilpatrick holds a career award from the  
600 Fonds de recherche du Québec – Santé (Senior Research Salary Award) and holder of  
601 the Susan E. French Chair in Nursing Research and Innovative Practice. No funding  
602 sources were involved in the study conception and design, data collection, analysis,  
603 interpretation, or in the final decision to submit this manuscript for publication.

### 604 **Competing interest**

605 None to declare.

### 606 **Acknowledgments**

607 The authors would like to acknowledge the comments received from Christine Maheu,  
608 Andraea Van Hulst, and Alain Biron.

#### 609 **Author Contributions**

610 Conceptualization: Li-Anne Audet, Mélanie Lavoie-Tremblay, Éric Tchouaket, Kelley  
611 Kilpatrick

612 Methodology: Li-Anne Audet, Mélanie Lavoie-Tremblay, Éric Tchouaket, Kelley  
613 Kilpatrick

614 Supervision: Mélanie Lavoie-Tremblay, Éric Tchouaket, Kelley Kilpatrick

615 Writing – original draft: Li-Anne Audet

616 Writing – review & editing: Mélanie Lavoie-Tremblay, Éric Tchouaket, Kelley Kilpatrick

#### 617 **References**

618 1. Caplan LR. Primer on cerebrovascular diseases. London, United Kingdom:  
619 Academic Press is an imprint of Elsevier; 2017.

620  
621 2. Bowdish ME, D'Agostino RS, Thourani VH, Desai N, Shahian DM, Fernandez  
622 FG, et al. The Society of Thoracic Surgeons Adult Cardiac Surgery Database: 2020  
623 Update on Outcomes and Research. *The Annals of thoracic surgery*. 2020;109(6):1646-  
624 55.

Formatted: French (Canada)

Formatted: French (Canada)

625  
626 3. Philippon F, Racine N, Labrecque N, Paradis M-J. Réseau québécois de  
627 cardiologie tertiaire. Rapport d'activité 2010-2013. Québec, QC; 2013.

628  
629 4. Canadian Institute of Health Information. Cardiac Care Quality Indicators Report.  
630 Ottawa, ON: Canadian Institute for Health Information  
631 ; 2017.

632  
633 5. Bourgon Labelle J, Audet L, Farand P, Rochefort C. Are hospital nurse staffing  
634 practices associated with postoperative cardiac events and death? A systematic review.  
635 PLOS ONE [Internet]. 2019; 14(10).

636  
637 6. Lane-Fall MB, Ramaswamy TS, Brown SES, He X, Gutsche JT, Fleisher LA, et  
638 al. Structural, Nursing, and Physician Characteristics and 30-Day Mortality for Patients  
639 Undergoing Cardiac Surgery in Pennsylvania. *Critical care medicine*. 2017;45(9):1472-  
640 80.

641

- 642 7. Benjamin JE, Virani SS, Callaway WC, Chamberlain MA, Chang RA, Cheng ES,  
643 et al. Heart Disease and Stroke Statistics—2018 Update: A Report From the American  
644 Heart Association. *Circulation*. 2019;137(12):e67-e492.
- 645
- 646 8. Goldfarb M, Bendayan M, Rudski LG, Morin JF, Langlois Y, Ma F, et al. Cost of  
647 Cardiac Surgery in Frail Compared With Nonfrail Older Adults. *The Canadian journal of*  
648 *cardiology*. 2017;33(8):1020-6.
- 649
- 650 9. McConnell G, Woltz P, Bradford WT, Ledford JE, Williams JB. Enhanced  
651 recovery after cardiac surgery program to improve patient outcomes. *Nursing*.  
652 2018;48(11):24-31.
- 653
- 654 10. The Society of Thoracic Surgeons. Performance Measures 2019  
655 [internet], Chicago (USA): The Society of Thoracic Surgeons; 2019 [updated 2019; cited  
656 2021 Aug 24]. Available from: [https://www.sts.org/quality-safety/performance-](https://www.sts.org/quality-safety/performance-measures)  
657 [measures](https://www.sts.org/quality-safety/performance-measures)].
- 658
- 659 11. Khalil V, Danninger M, Wang W, Khalil H. An audit of adherence to heart failure  
660 guidelines in an Australian hospital: A pharmacist perspective. *Journal of Evaluation in*  
661 *Clinical Practice*. 2017;23(6):1195-202.
- 662
- 663 12. Burnier M, Egan BM. Adherence in Hypertension: A Review of Prevalence, Risk  
664 Factors, Impact, and Management. *Circulation Research*. 2019;124(7):1124-40.
- 665
- 666 13. Chan W, Chen A, Tiao D, Selinger C, Leong R. Medication adherence in  
667 inflammatory bowel disease. *Intestinal Research [Internet]*. 2017; 15(4):434-45.
- 668
- 669 14. López-Campos JL, Quintana Gallego E, Carrasco Hernández L. Status of and  
670 strategies for improving adherence to COPD treatment. *International Journal of COPD*  
671 [Internet]. 2019; 14:1503-15.
- 672
- 673 15. Moon SJ, Lee WY, Hwang JS, Hong YP, Morisky DE. Accuracy of a screening  
674 tool for medication adherence: A systematic review and meta-analysis of the Morisky  
675 Medication Adherence Scale-8. *PloS one*. 2017;12(11):e0187139.
- 676
- 677 16. Witwer M, Dobbins G, Uher C, McFarren M. Auditing CAUTI Best Practices  
678 Bundle Adherence in a 24-bed Neurovascular/Cardiovascular/Intensive Care Unit. *AJIC:*  
679 *American Journal of Infection Control*. 2019;47(6 Supplement):S30.
- 680
- 681 17. Larrazet F, Folliguet T, Laborde F, Bachet J, Hervé C. Mortality meetings: ethical  
682 considerations and adherence to evidence-based practice from 6 years of experience in  
683 a mixed cardiac department. *European journal of cardio-thoracic surgery : official*  
684 *journal of the European Association for Cardio-thoracic Surgery*. 2011;40(5):1039-45.
- 685

Formatted: French (Canada)

Formatted: French (Canada)

- 686 18. Norful AA, Ye S, Van der-Biezen M, Poghosyan L. Nurse Practitioner-Physician  
687 Comanagement of Patients in Primary Care. Policy, politics & nursing practice.  
688 2018;1527154418815024.  
689
- 690 19. Reich E, Then K, Rankin J. Barriers to Clinical Practice Guideline Implementation  
691 for Septic Patients in the Emergency Department. Journal of Emergency Nursing.  
692 2018;44(6):552-62.  
693
- 694 20. Kleinpell. Outcome assessment in advanced practice nursing. New York, NY:  
695 Springer Publishing Company, LLC; 2017.  
696
- 697 21. Smigorowsky MJ, Sebastianski M, Sean McMurtry M, Tsuyuki RT, Norris CM.  
698 Outcomes of nurse practitioner-led care in patients with cardiovascular disease: A  
699 systematic review and meta-analysis. Journal of advanced nursing. 2020;76(1):81-95.  
700
- 701 22. Yang BK, Johantgen ME, Trinkoff AM, Idzik SR, Wince J, Tomlinson C. State  
702 Nurse Practitioner Practice Regulations and U.S. Health Care Delivery Outcomes: A  
703 Systematic Review. Medical care research and review : MCRR.  
704 2020:1077558719901216.  
705
- 706 23. Mares M, McNally S, Fernandez R. Effectiveness of nurse-led cardiac  
707 rehabilitation programs following coronary artery bypass graft surgery: a systematic  
708 review. 2018;16(12):2304-29.  
709
- 710 24. Audet L, Paquette L, Bordeleau S, Lavoie-Tremblay M, Kilpatrick K. The  
711 association between advanced practice nursing roles and outcomes in adults following  
712 cardiac surgery: A systematic review of randomized controlled trials. International  
713 journal of Nursing Studies. 2021.  
714
- 715 25. Kwak C, Ko Y. Clinical Nurse Specialist–Led Implementation of an Early  
716 Discharge Protocol After Cardiac Surgery. Clin Nurse Spec. 2019;33(4):184-90.  
717
- 718 26. Doyle L. A systematic review to enquire is Advanced Nurse Practitioner care  
719 more effective for the cardiac surgery patient, compared to standard care. European  
720 Journal of Cardiovascular Nursing. 2015;1:90.  
721
- 722 27. Hall MH, Esposito RA, Jahn L, Blenderman R, Hartman AR, Pekmezaris R, et al.  
723 Cardiac surgery nurse practitioner home visits prevent coronary artery bypass graft  
724 readmissions. Annals of Thoracic Surgery. 2014;97(5):1488-95.  
725
- 726 28. Southey D, Mishra PK, Nevill A, Aktuerk D, Luckraz H. Continuity of care by  
727 cardiothoracic nurse practitioners: Impact on outcome. Asian Cardiovascular and  
728 Thoracic Annals. 2014;22(8):944-7.  
729
- 730 29. Skinner H, Skoyles J, Redfearn S, Jutley R, Mitchell I, Richens D. Advanced care  
731 nurse practitioners can safely provide sole resident cover for level three patients: impact

- 732 on outcomes, cost and work patterns in a cardiac surgery programme. European  
733 Journal Of Cardio-Thoracic Surgery. 2013;43(1):19-22.  
734
- 735 30. Bourgon Labelle J, Farand P, Vincelette C, Dumont M, Le Blanc M, Rochefort  
736 CM. Validation of an algorithm based on administrative data to detect new onset of atrial  
737 fibrillation after cardiac surgery. BMC Medical Research Methodology. 2020;20(1).  
738
- 739 31. Needleman J, Buerhaus P, Pankratz VS, Leibson CL, Stevens SR, Harris M.  
740 Nurse staffing and inpatient hospital mortality. New England Journal of Medicine.  
741 2011;364(11):1037-45.  
742
- 743 32. von Elm E, Altman DG, Egger M, Pocock SJ, Gøtzsche PC, Vandenbroucke JP.  
744 The Strengthening the Reporting of Observational Studies in Epidemiology (STROBE)  
745 Statement: guidelines for reporting observational studies. International Journal Of  
746 Surgery (London, England). 2014;12(12):1495-9.  
747
- 748 33. Bourgon Labelle J. Associations entre les pratiques quotidiennes de gestion du  
749 personnel de soins et l'incidence de la fibrillation auriculaire postopératoire en chirurgie  
750 cardiaque. Savoirs UdeS: Université de Sherbrooke; 2020.  
751
- 752 34. Ordre des infirmières et infirmiers du Québec. Encadrement de la pratique des  
753 IPS Montréal [internet]. Québec (Can):Ordre des infirmières et infirmiers du  
754 Québec;2021 [updated 2021 cited 2021 Aug 24]. Available from:  
755 [https://www.oiig.org/en/pratique-professionnelle/pratique-avancee/ips/encadrement-de-](https://www.oiig.org/en/pratique-professionnelle/pratique-avancee/ips/encadrement-de-la-pratique-des-ips)  
756 [la-pratique-des-ips](https://www.oiig.org/en/pratique-professionnelle/pratique-avancee/ips/encadrement-de-la-pratique-des-ips)  
757
- 758 35. Hoffman LA, Guttendorf J. Integrating Nurse Practitioners into the Critical Care  
759 Team. Critical Care Alert. 2014;21(12).  
760
- 761 36. Canadian Institute of Health Information. Canadian Coding Standards for ICD-10-  
762 CA and CCI [internet]. Ottawa (Can):Canadian Institute of Health Information; 2019  
763 [updated 2019 cited 2021 Aug 24]. Available from:  
764 <https://secure.cihi.ca/estore/productSeries.htm?pc=PCC189>.  
765
- 766 37. Yenipinar A, Koç Ş, Çanga D, Kaya F. Determining Sample Size in Logistic  
767 Regression with G-Power. Black Sea Journal of Engineering and Science.  
768 2019;2(1):16-22.  
769
- 770 38. Coleman N, Halas G, Peeler W, Casalang N, Williamson T, Katz A. From  
771 patient care to research: a validation study examining the factors contributing to data  
772 quality in a primary care electronic medical record database. BMC Family Practice  
773 [Internet]. 2015; 16(1):11.  
774
- 775 39. Sudeh C-S, Hardeep S, David R, Jill S, Morris R, Aneez E, et al. Missed  
776 diagnostic opportunities and English general practice: a study to determine their  
777 incidence, confounding and contributing factors and potential impact on patients through

Formatted: French (Canada)



778 retrospective review of electronic medical records. *Implementation Science* [Internet].  
779 2015; 10(1):105.

780

781 40. Tremblay J-A, Laramée P, Lamarche Y, Denault A, Beaubien-Souligny W,  
782 Frenette A-J, et al. Potential risks in using midodrine for persistent hypotension after  
783 cardiac surgery: a comparative cohort study. *Annals of intensive care*. 2020;10(1):1-8.  
784

785 41. Kuhns BD, Hannon CP, Makhni EC, Alter J, Mather RC, 3rd, Salata MJ, et al. A  
786 Comparison of Clinical Outcomes After Unilateral or Bilateral Hip Arthroscopic Surgery:  
787 Age- and Sex-Matched Cohort Study. *The American journal of sports medicine*.  
788 2017;45(13):3044-51.  
789

790 42. Ravi B, Pincus D, Wasserstein D, Govindarajan A, Huang A, Austin PC, et al.  
791 Association of Overlapping Surgery With Increased Risk for Complications Following  
792 Hip Surgery: A Population-Based, Matched Cohort Study. *JAMA internal medicine*.  
793 2018;178(1):75-83.  
794

795 43. Oichi T, Chikuda H, Ohya J, Ohtomo R, Morita K, Matsui H, et al. Mortality and  
796 morbidity after spinal surgery in patients with Parkinson's disease: a retrospective  
797 matched-pair cohort study. *Spine journal*. 2017;17(4):531-7.  
798

799 44. Charlson ME, Pompei P, Ales KL, MacKenzie CR. A new method of classifying  
800 prognostic comorbidity in longitudinal studies: development and validation. *Journal of*  
801 *chronic diseases*. 1987;40(5):373-83.  
802

803 45. Quan H, Li B, Couris CM, Fushimi K, Graham P, Hider P, et al. Updating and  
804 validating the Charlson comorbidity index and score for risk adjustment in hospital  
805 discharge abstracts using data from 6 countries. *American Journal of Epidemiology*.  
806 2011;173(6):676-82.  
807

808 46. Terwee CB, Prinsen C, Chiarotto A, de Vet H, Bouter LM, Alonso J, et al.  
809 COSMIN methodology for assessing the content validity of PROMs—user manual.  
810 Amsterdam: VU University Medical Center. 2018.  
811

812 47. Holt TP, Loraas TM. Using qualtrics panels to source external auditors: A  
813 replication study. *Journal of Information Systems*. 2019;33(1):29-41.  
814

815 48. Streiner DL, Norman GR, Cairney J. Health measurement scales : a practical  
816 guide to their development and use. Oxford: Oxford University Press; 2015.  
817

818 49. Grant JS, Davis LL. Selection and use of content experts for instrument  
819 development. *Research in nursing & health*. 1997;20(3):269-74.  
820

821 50. O'Brien SMP, Shahian DMMD, DeLong ERP, Normand S-LTP, Edwards FHMD,  
822 Ferraris VAMD, et al. Quality Measurement in Adult Cardiac Surgery: Part 2—Statistical

Formatted: French (Canada)

Formatted: French (Canada)

- 823 Considerations in Composite Measure Scoring and Provider Rating. *The Annals of*  
824 *Thoracic Surgery*. 2007;83(4 Supplement):S13-S26.
- 825
- 826 51. Shahian D, Edwards F, Ferraris V, Haan C, Rich J, Normand S, et al. Quality  
827 Measurement in Adult Cardiac Surgery: Part 1—Conceptual Framework and Measure  
828 Selection. *The Annals of Thoracic Surgery*. 2007;83(4 Supplement):S3-S12.
- 829
- 830 52. Dubois CA, D'Amour D, Tchouaket E, Clarke S, Rivard M, Blais R. Associations  
831 of patient safety outcomes with models of nursing care organization at unit level in  
832 hospitals. *International journal for quality in health care : journal of the International*  
833 *Society for Quality in Health Care*. 2013;25(2):110-7.
- 834
- 835 53. Gearing RE, Mian IA, Barber J, Ickowicz A. A methodology for conducting  
836 retrospective chart review research in child and adolescent psychiatry. *Journal of the*  
837 *Canadian Academy of Child and Adolescent Psychiatry*. 2006;15(3):126-34.
- 838
- 839
- 840 54. Vassar M, Holzmann M. The retrospective chart review: important  
841 methodological considerations. *Journal of educational evaluation for health professions*.  
842 2013;10:12.
- 843
- 844 55. McHugh ML. Interrater reliability: the kappa statistic. *Biochemia medica*.  
845 2012;22(3):276-82.
- 846
- 847 56. Tchouaket E, Boivin S, Robins S, Sia D, Kilpatrick K, Brousseau S, et al.  
848 Development and validation of a time and motion guide to assess the costs of  
849 prevention and control interventions for nosocomial infections: A Delphi method among  
850 experts. *PLoS ONE [Internet]*. 2020; 15(11).
- 851
- 852 57. Rym B, HENDY A, Marine L, Olivier S, Corinne A. Using and reporting the Delphi  
853 method for selecting healthcare quality indicators: a systematic review. *PLoS ONE*  
854 *[Internet]*. 2011; 6(6).
- 855
- 856 58. Polit DF, Beck CT, Owen SV. Is the CVI an acceptable indicator of content  
857 validity? Appraisal and recommendations. *Research in Nursing & Health*.  
858 2007;30(4):459-67.
- 859
- 860 59. Vaismoradi M, Salsali M, Turunen H, Bondas T. A qualitative study on Iranian  
861 nurses' experiences and perspectives on how to provide safe care in clinical practice.  
862 *Journal of Research in Nursing*. 2013;18(4):351-65.
- 863
- 864 60. Tabachnick, Fidell. *Using multivariate statistics*. Sixth edition.. ed. Fidell L, editor:  
865 Boston : Pearson Education; 2013.
- 866
- 867 61. Ibrahim JG, Chu H, Chen M-H. Missing data in clinical studies: issues and  
868 methods. *J Clin Oncol*. 2012;30(26):3297.

- 869  
870 62. Armstrong RA. When to use the Bonferroni correction. *Ophthalmic &*  
871 *physiological optics : the journal of the British College of Ophthalmic Opticians*  
872 *(Optometrists)*. 2014;34(5):502-8.  
873  
874 63. Daoud JI, editor *Multicollinearity and regression analysis*. *Journal of Physics:*  
875 *Conference Series*; 2017: IOP Publishing.  
876  
877 64. Kilpatrick K, Tchouaket E, Carter N, Bryant-Lukosius D, DiCenso A. Structural  
878 and Process Factors That Influence Clinical Nurse Specialist Role Implementation.  
879 *Clinical Nurse Specialist*. 2016;30(2):89-100.  
880  
881 65. Olive DJ. *Linear regression*. Cham, Switzerland: Springer; 2017.  
882  
883 66. Ramakrishnan N, Hanauer D, Keller B. Mining electronic health records.  
884 *Computer*. 2010;43(10):77-81.  
885  
886  
887  
888  
889  
890  
891  
892  
893
